# Supplementary material for: A somatic checkpoint through NHR-49/HNF4α governs reproductive investment and longevity in C. elegans
Source: Research Square preprint supplement (doi:10.21203/rs.3.rs-7217416/v1), 2025-09-03
Supplement: Supplementary file 1 [file 32635efd7b71e443f0d81c7b.xlsx]

## Sheet: Details
Sheet one shows the WBIDs of the common genes that are both bound by NHR-49 and are differentially expressed in nhr-49(-) mutants

## Sheet: Sheet1
ID: WBGene00006418
ID: WBGene00011150
ID: WBGene00004987
ID: WBGene00018731
ID: WBGene00000213
ID: WBGene00000298
ID: WBGene00016052
ID: WBGene00023069
ID: WBGene00012201
ID: WBGene00004989
ID: WBGene00009903
ID: WBGene00017103
ID: WBGene00011330
ID: WBGene00009902
ID: WBGene00021582
ID: WBGene00007362
ID: WBGene00045117
ID: WBGene00002259
ID: WBGene00022887
ID: WBGene00017964
ID: WBGene00011364
ID: WBGene00010597
ID: WBGene00001399
ID: WBGene00008629
ID: WBGene00022275
ID: WBGene00006418
ID: WBGene00021298
