# Supplementary material for: A somatic checkpoint through NHR-49/HNF4α governs reproductive investment and longevity in C. elegans
Source: Research Square preprint supplement (doi:10.21203/rs.3.rs-7217416/v1), 2025-09-03
Supplement: Supplementary file 2 [file 5b76928deeb821b183b21357.xlsx]

## Sheet: Details
Table 3 shows NHR-49 binding targets

## Sheet: Table 3
	seqnames	start	end	width
1	I	36045	36501	457
2	I	42054	42508	455
3	I	170980	171415	436
4	I	669844	670199	356
5	I	1068184	1068590	407
6	I	1069769	1069968	200
7	I	1690980	1691585	606
8	I	2084202	2084645	444
9	I	2291139	2291610	472
10	I	2542968	2543965	998
11	I	2587172	2587954	783
12	I	2666506	2666847	342
13	I	2667796	2668292	497
14	I	2688873	2689776	904
15	I	2857643	2857928	286
16	I	3085287	3085631	345
17	I	3113612	3114099	488
18	I	3118932	3119468	537
19	I	3501106	3501483	378
20	I	3664223	3666111	1889
21	I	3672571	3673024	454
22	I	3681808	3682314	507
23	I	3721345	3722009	665
24	I	3822629	3823133	505
25	I	3829685	3830882	1198
26	I	3991176	3991455	280
27	I	4174470	4175027	558
28	I	4178420	4179016	597
29	I	4314368	4314783	416
30	I	4328127	4328449	323
31	I	4434610	4435052	443
32	I	4436720	4437283	564
33	I	4486568	4487046	479
34	I	4489099	4489769	671
35	I	4516121	4516522	402
36	I	4516822	4517359	538
37	I	4653511	4654409	899
38	I	4699161	4699787	627
39	I	4701020	4701921	902
40	I	4703161	4703472	312
41	I	4720893	4721505	613
42	I	4804251	4805153	903
43	I	4914172	4914676	505
44	I	4916134	4917076	943
45	I	4917249	4917666	418
46	I	4932973	4933617	645
47	I	4996469	4996826	358
48	I	5025008	5025842	835
49	I	5031214	5031835	622
50	I	5032784	5033880	1097
51	I	5035522	5035936	415
52	I	5037151	5037650	500
53	I	5130712	5131587	876
54	I	5311442	5312106	665
55	I	5312778	5313431	654
56	I	5314492	5315185	694
57	I	5316120	5316804	685
58	I	5322226	5323233	1008
59	I	5345092	5345643	552
60	I	5353885	5354725	841
61	I	5388378	5389134	757
62	I	5408414	5408811	398
63	I	5415644	5416736	1093
64	I	5497394	5497887	494
65	I	5519506	5519926	421
66	I	5545621	5545924	304
67	I	5870476	5870974	499
68	I	5885231	5885710	480
69	I	5886015	5886401	387
70	I	6073494	6073855	362
71	I	6076304	6076901	598
72	I	6076936	6077613	678
73	I	6081417	6081814	398
74	I	6091464	6093117	1654
75	I	6103073	6103596	524
76	I	6119575	6119953	379
77	I	6120451	6121131	681
78	I	6200293	6200722	430
79	I	6203612	6204134	523
80	I	6210626	6211237	612
81	I	6292801	6293375	575
82	I	6293929	6295041	1113
83	I	6374021	6374769	749
84	I	6412227	6412941	715
85	I	6416733	6417346	614
86	I	6418362	6419197	836
87	I	6458853	6460612	1760
88	I	6496324	6496853	530
89	I	6497169	6497553	385
90	I	6498217	6499980	1764
91	I	6554497	6554977	481
92	I	6569080	6569764	685
93	I	6572474	6573109	636
94	I	6577789	6578641	853
95	I	6579713	6580114	402
96	I	6727704	6728523	820
97	I	6731515	6733485	1971
98	I	6736733	6737297	565
99	I	6838093	6838671	579
100	I	6862043	6862311	269
101	I	6863288	6863828	541
102	I	6963161	6963697	537
103	I	6963996	6964833	838
104	I	7054018	7055161	1144
105	I	7055588	7056026	439
106	I	7056391	7057442	1052
107	I	7058532	7059027	496
108	I	7059068	7059921	854
109	I	7082665	7083872	1208
110	I	7084542	7085135	594
111	I	7087151	7087738	588
112	I	7126830	7127722	893
113	I	7127789	7128665	877
114	I	7147518	7148077	560
115	I	7303052	7303463	412
116	I	7354307	7354625	319
117	I	7474709	7477347	2639
118	I	7477415	7477986	572
119	I	7479223	7479674	452
120	I	7489270	7493410	4141
121	I	7500147	7500841	695
122	I	7541947	7542500	554
123	I	7552599	7553290	692
124	I	7562971	7563519	549
125	I	7570756	7571639	884
126	I	7573715	7574307	593
127	I	7575224	7575750	527
128	I	7595312	7596639	1328
129	I	7596660	7598410	1751
130	I	7656239	7661580	5342
131	I	7662739	7663969	1231
132	I	7848851	7849707	857
133	I	7861403	7862404	1002
134	I	7865842	7866383	542
135	I	8009855	8010677	823
136	I	8018972	8019441	470
137	I	8124394	8125129	736
138	I	8133523	8134158	636
139	I	8218281	8218742	462
140	I	8344293	8344847	555
141	I	8411112	8411674	563
142	I	8426366	8427267	902
143	I	8614680	8615235	556
144	I	8792119	8792697	579
145	I	8852289	8853090	802
146	I	8863906	8866113	2208
147	I	8867316	8868653	1338
148	I	8917663	8918074	412
149	I	9014139	9014520	382
150	I	9042713	9043072	360
151	I	9046865	9047484	620
152	I	9055213	9055753	541
153	I	9057789	9058166	378
154	I	9067854	9068227	374
155	I	9082964	9083530	567
156	I	9095025	9095939	915
157	I	9103480	9104251	772
158	I	9112926	9113484	559
159	I	9115420	9115949	530
160	I	9128042	9130182	2141
161	I	9130241	9130782	542
162	I	9130932	9131620	689
163	I	9131631	9132181	551
164	I	9168312	9168982	671
165	I	9275203	9275597	395
166	I	9276307	9276583	277
167	I	9307521	9308196	676
168	I	9316843	9317348	506
169	I	9327652	9328170	519
170	I	9343568	9344328	761
171	I	9381170	9382224	1055
172	I	9383249	9384504	1256
173	I	9385600	9386376	777
174	I	9405221	9405675	455
175	I	9540816	9541448	633
176	I	9671493	9672252	760
177	I	9735523	9735929	407
178	I	9736189	9736644	456
179	I	9737326	9737692	367
180	I	9747695	9748190	496
181	I	9752276	9753402	1127
182	I	9789955	9791304	1350
183	I	9825857	9826578	722
184	I	9851983	9852575	593
185	I	9853793	9854997	1205
186	I	9869057	9869812	756
187	I	9870818	9871285	468
188	I	9872602	9873865	1264
189	I	9881972	9882505	534
190	I	9883167	9883887	721
191	I	9963474	9963991	518
192	I	10032492	10032994	503
193	I	10103100	10103869	770
194	I	10130710	10131045	336
195	I	10131948	10132396	449
196	I	10173519	10174088	570
197	I	10192513	10193080	568
198	I	10197029	10197905	877
199	I	10513813	10514341	529
200	I	10516729	10517462	734
201	I	10517665	10518161	497
202	I	10538954	10539744	791
203	I	10553944	10554465	522
204	I	10560199	10561155	957
205	I	10562029	10563038	1010
206	I	10564818	10565653	836
207	I	10565723	10566026	304
208	I	10586571	10587065	495
209	I	10747193	10747546	354
210	I	10748090	10748920	831
211	I	10749856	10750553	698
212	I	10751397	10752399	1003
213	I	10752555	10753487	933
214	I	10753821	10754594	774
215	I	10756940	10757337	398
216	I	10757871	10758659	789
217	I	10798607	10798924	318
218	I	10964989	10965557	569
219	I	10978161	10978631	471
220	I	11693446	11693957	512
221	I	11994828	11995139	312
222	I	11996100	11996656	557
223	I	12039569	12040363	795
224	I	12343355	12343939	585
225	I	12546735	12547087	353
226	I	12547889	12548349	461
227	I	12937520	12938216	697
228	I	12942221	12942745	525
229	I	12949692	12950549	858
230	I	12966593	12966999	407
231	I	12970104	12970565	462
232	I	13276931	13277312	382
233	I	13411350	13411754	405
234	I	13475294	13475969	676
235	I	13533854	13534315	462
236	I	13537238	13537813	576
237	I	13575651	13576101	451
238	I	13600404	13600732	329
239	I	15041445	15041987	543
240	I	15061816	15067967	6152
241	II	122009	122648	640
242	II	159310	159656	347
243	II	162162	162642	481
244	II	373078	373405	328
245	II	891402	891981	580
246	II	1188204	1188498	295
247	II	1870749	1871350	602
248	II	2320005	2320428	424
249	II	2800767	2801307	541
250	II	2802342	2803142	801
251	II	2804932	2805599	668
252	II	2833720	2834502	783
253	II	2975428	2975930	503
254	II	3111128	3111604	477
255	II	3318795	3319418	624
256	II	3322169	3322601	433
257	II	3952478	3952745	268
258	II	3952878	3953423	546
259	II	3994544	3994941	398
260	II	4506366	4507009	644
261	II	4507565	4508109	545
262	II	4642853	4643764	912
263	II	4728562	4729560	999
264	II	4769069	4769539	471
265	II	4856935	4857398	464
266	II	4881548	4882849	1302
267	II	4925399	4926191	793
268	II	4941522	4942214	693
269	II	4942594	4943238	645
270	II	4960457	4961193	737
271	II	4993545	4993968	424
272	II	5017148	5017751	604
273	II	5019208	5020073	866
274	II	5081220	5081514	295
275	II	5097434	5097770	337
276	II	5184661	5186674	2014
277	II	5186858	5187317	460
278	II	5201604	5202467	864
279	II	5234606	5235047	442
280	II	5307174	5308149	976
281	II	5320022	5320911	890
282	II	5321040	5323072	2033
283	II	5323550	5324375	826
284	II	5330027	5330888	862
285	II	5336503	5337778	1276
286	II	5373306	5373755	450
287	II	5378078	5378612	535
288	II	5425987	5426724	738
289	II	5496317	5497219	903
290	II	5512010	5513211	1202
291	II	5553441	5554237	797
292	II	5554621	5555163	543
293	II	5571723	5572896	1174
294	II	5585692	5586078	387
295	II	5599550	5599923	374
296	II	5605430	5606125	696
297	II	5619288	5619768	481
298	II	5660969	5661220	252
299	II	5698137	5699232	1096
300	II	5715484	5715888	405
301	II	5749706	5750062	357
302	II	5829925	5830326	402
303	II	5873474	5873973	500
304	II	5885638	5886607	970
305	II	5899895	5900901	1007
306	II	5911846	5912588	743
307	II	5913802	5914346	545
308	II	5929742	5930946	1205
309	II	5931814	5932749	936
310	II	5985214	5985654	441
311	II	6025725	6026054	330
312	II	6026601	6027083	483
313	II	6049617	6050127	511
314	II	6176277	6177081	805
315	II	6177817	6178623	807
316	II	6296798	6297134	337
317	II	6328466	6329120	655
318	II	6344477	6346202	1726
319	II	6346372	6347407	1036
320	II	6348376	6349091	716
321	II	6370114	6370598	485
322	II	6374548	6375120	573
323	II	6413764	6414337	574
324	II	6448131	6449159	1029
325	II	6449637	6450130	494
326	II	6520023	6520456	434
327	II	6524509	6525016	508
328	II	6561345	6562863	1519
329	II	6588898	6589618	721
330	II	6609375	6610039	665
331	II	6612456	6612966	511
332	II	6614509	6615746	1238
333	II	6629414	6630443	1030
334	II	6665130	6666381	1252
335	II	6683669	6684094	426
336	II	6782973	6783217	245
337	II	6800208	6800924	717
338	II	6821740	6822944	1205
339	II	6823984	6824998	1015
340	II	6825757	6826411	655
341	II	6826719	6827166	448
342	II	6827415	6828167	753
343	II	6829012	6829529	518
344	II	6833233	6834463	1231
345	II	6835509	6835844	336
346	II	6836018	6837706	1689
347	II	6841186	6841548	363
348	II	6842429	6843272	844
349	II	6847792	6848471	680
350	II	6849159	6849731	573
351	II	6887294	6888658	1365
352	II	6897441	6897956	516
353	II	6908611	6909056	446
354	II	6918914	6919853	940
355	II	6928219	6928919	701
356	II	6932940	6933792	853
357	II	6943072	6943851	780
358	II	6951325	6951901	577
359	II	6973532	6974252	721
360	II	7025414	7025840	427
361	II	7031288	7031683	396
362	II	7058853	7061067	2215
363	II	7072812	7073823	1012
364	II	7102352	7102815	464
365	II	7157223	7157863	641
366	II	7166845	7167193	349
367	II	7194804	7195479	676
368	II	7195921	7196410	490
369	II	7208215	7208622	408
370	II	7210145	7210546	402
371	II	7232362	7233178	817
372	II	7236952	7237362	411
373	II	7242792	7243317	526
374	II	7251907	7252453	547
375	II	7255635	7256138	504
376	II	7277187	7277658	472
377	II	7279752	7281112	1361
378	II	7287004	7288521	1518
379	II	7289184	7290540	1357
380	II	7337043	7338112	1070
381	II	7338785	7339563	779
382	II	7363927	7364470	544
383	II	7393089	7394298	1210
384	II	7457244	7457575	332
385	II	7478644	7479299	656
386	II	7528114	7529822	1709
387	II	7554842	7555372	531
388	II	7557923	7558414	492
389	II	7615337	7615820	484
390	II	7618324	7618649	326
391	II	7623038	7624128	1091
392	II	7661929	7662700	772
393	II	7705166	7705596	431
394	II	7776412	7778270	1859
395	II	7808719	7809342	624
396	II	7814849	7815290	442
397	II	7857478	7857842	365
398	II	7944289	7944842	554
399	II	8001469	8002071	603
400	II	8011818	8013135	1318
401	II	8015080	8017501	2422
402	II	8022237	8022671	435
403	II	8028071	8028736	666
404	II	8032524	8033115	592
405	II	8033824	8034352	529
406	II	8078049	8078502	454
407	II	8126071	8126478	408
408	II	8126797	8127650	854
409	II	8128098	8129983	1886
410	II	8205486	8205791	306
411	II	8226438	8226868	431
412	II	8263367	8263969	603
413	II	8382726	8383369	644
414	II	8383848	8384820	973
415	II	8384854	8386463	1610
416	II	8386641	8388639	1999
417	II	8388850	8391294	2445
418	II	8392141	8392614	474
419	II	8399184	8399637	454
420	II	8417324	8418038	715
421	II	8441357	8442451	1095
422	II	8478627	8479971	1345
423	II	8480406	8481761	1356
424	II	8483419	8485102	1684
425	II	8485325	8486381	1057
426	II	8487373	8487865	493
427	II	8506712	8507059	348
428	II	8561316	8561751	436
429	II	8566830	8567376	547
430	II	8648241	8648561	321
431	II	8650665	8651046	382
432	II	8704441	8704848	408
433	II	8738035	8739621	1587
434	II	8739713	8742780	3068
435	II	8743069	8743923	855
436	II	8743968	8745489	1522
437	II	8745584	8748909	3326
438	II	8769700	8770365	666
439	II	8784402	8784902	501
440	II	8787313	8787802	490
441	II	8819189	8819703	515
442	II	8884482	8884891	410
443	II	8914607	8915051	445
444	II	8991598	8991918	321
445	II	9060198	9060731	534
446	II	9061121	9062261	1141
447	II	9092564	9093426	863
448	II	9094336	9094785	450
449	II	9108492	9109691	1200
450	II	9112758	9114171	1414
451	II	9116235	9117143	909
452	II	9117867	9118392	526
453	II	9156369	9156832	464
454	II	9157161	9157695	535
455	II	9160141	9161099	959
456	II	9231182	9231639	458
457	II	9273851	9274408	558
458	II	9280431	9280933	503
459	II	9281606	9282117	512
460	II	9282725	9283302	578
461	II	9283463	9285396	1934
462	II	9291469	9292146	678
463	II	9419851	9420738	888
464	II	9468402	9469007	606
465	II	9482566	9482972	407
466	II	9483713	9484343	631
467	II	9500776	9501644	869
468	II	9501738	9502558	821
469	II	9586828	9587217	390
470	II	9600326	9600774	449
471	II	9600836	9602180	1345
472	II	9602574	9603076	503
473	II	9603232	9603919	688
474	II	9604031	9605273	1243
475	II	9605325	9607592	2268
476	II	9618958	9621586	2629
477	II	9621590	9622425	836
478	II	9645244	9645676	433
479	II	9646023	9646472	450
480	II	9655340	9656729	1390
481	II	9660299	9660783	485
482	II	9686426	9687279	854
483	II	9731792	9732199	408
484	II	9740373	9741066	694
485	II	9770064	9770557	494
486	II	9781879	9782297	419
487	II	9787300	9787909	610
488	II	9791135	9791573	439
489	II	9797606	9798138	533
490	II	9800281	9800732	452
491	II	9807570	9807982	413
492	II	9891627	9892324	698
493	II	9931373	9931980	608
494	II	9935019	9935704	686
495	II	9937545	9938159	615
496	II	10001064	10001560	497
497	II	10029080	10029510	431
498	II	10094212	10094566	355
499	II	10336051	10336514	464
500	II	10382130	10382689	560
501	II	10388274	10389539	1266
502	II	10389713	10390122	410
503	II	10390270	10390850	581
504	II	10402955	10403376	422
505	II	10443839	10444250	412
506	II	10445947	10447131	1185
507	II	10447217	10448076	860
508	II	10527677	10528278	602
509	II	10542041	10542565	525
510	II	10548800	10549961	1162
511	II	10551931	10553152	1222
512	II	10555380	10557639	2260
513	II	10820603	10821050	448
514	II	10850773	10851674	902
515	II	10860784	10861379	596
516	II	10861905	10863165	1261
517	II	10918258	10918659	402
518	II	10924599	10925130	532
519	II	10925697	10926020	324
520	II	11042636	11043320	685
521	II	11153196	11154303	1108
522	II	11154908	11155785	878
523	II	11181222	11181679	458
524	II	11239052	11239397	346
525	II	11418504	11418911	408
526	II	11448678	11449183	506
527	II	11464110	11465014	905
528	II	11469726	11470224	499
529	II	11472571	11473023	453
530	II	11595680	11596876	1197
531	II	11604746	11604990	245
532	II	11611563	11611893	331
533	II	11619107	11620916	1810
534	II	11634128	11634594	467
535	II	11635022	11636229	1208
536	II	11728427	11729234	808
537	II	11758262	11763102	4841
538	II	11813369	11814417	1049
539	II	12040010	12040586	577
540	II	12051666	12052810	1145
541	II	12425721	12426218	498
542	II	12577629	12578141	513
543	II	12798780	12799237	458
544	II	12894857	12895391	535
545	II	12944709	12945099	391
546	II	13073215	13073579	365
547	II	13076145	13076671	527
548	II	13077527	13078259	733
549	II	13461958	13462592	635
550	II	13465123	13465898	776
551	II	13467709	13468218	510
552	II	13638602	13638946	345
553	II	13664380	13664804	425
554	II	13671977	13672425	449
555	II	13780737	13781272	536
556	II	13829455	13830103	649
557	II	13834559	13834881	323
558	II	13957437	13958741	1305
559	II	14017080	14017707	628
560	II	14039414	14040765	1352
561	II	14043257	14043627	371
562	II	14049005	14049525	521
563	II	14050304	14050828	525
564	II	14250148	14250610	463
565	II	14296354	14296825	472
566	II	14301996	14302460	465
567	II	14302675	14303263	589
568	II	14306182	14306715	534
569	II	14306818	14307440	623
570	II	14415623	14416177	555
571	II	14438074	14438451	378
572	II	14496818	14497136	319
573	II	14528327	14528599	273
574	II	14598301	14599095	795
575	II	14812550	14813040	491
576	II	14822351	14822804	454
577	II	14864295	14864721	427
578	II	15025646	15026045	400
579	II	15074732	15075134	403
580	II	15111287	15111806	520
581	II	15169895	15170304	410
582	II	15197450	15197937	488
583	II	15251505	15252208	704
584	II	15263064	15263560	497
585	III	14679	15719	1041
586	III	107933	108891	959
587	III	354633	355289	657
588	III	434244	434680	437
589	III	600566	601056	491
590	III	623748	624184	437
591	III	640404	640620	217
592	III	709337	709695	359
593	III	831924	832404	481
594	III	832580	834046	1467
595	III	844578	845028	451
596	III	845451	845776	326
597	III	873341	873916	576
598	III	891068	891422	355
599	III	901363	902079	717
600	III	1002528	1002874	347
601	III	1017421	1018349	929
602	III	1018441	1020550	2110
603	III	1252466	1253077	612
604	III	1384028	1385045	1018
605	III	1818824	1819321	498
606	III	1920796	1921806	1011
607	III	1924821	1925670	850
608	III	1926244	1926968	725
609	III	2090787	2091058	272
610	III	2647562	2647843	282
611	III	2739455	2740040	586
612	III	3520238	3520529	292
613	III	3571183	3571833	651
614	III	3620970	3621859	890
615	III	3637258	3637736	479
616	III	3650241	3650734	494
617	III	3766797	3767229	433
618	III	3786381	3786912	532
619	III	3801258	3802492	1235
620	III	3832284	3833034	751
621	III	3834728	3835315	588
622	III	3839407	3840018	612
623	III	3857933	3858374	442
624	III	3862983	3863294	312
625	III	3866867	3867533	667
626	III	3873449	3874312	864
627	III	3980170	3980676	507
628	III	3987113	3987673	561
629	III	4223500	4224200	701
630	III	4225978	4226507	530
631	III	4227123	4227814	692
632	III	4237528	4238615	1088
633	III	4239869	4240817	949
634	III	4276830	4277170	341
635	III	4280465	4281126	662
636	III	4281959	4282445	487
637	III	4284274	4285118	845
638	III	4467618	4468001	384
639	III	4468329	4468894	566
640	III	4494471	4495023	553
641	III	4496044	4496629	586
642	III	4502760	4503429	670
643	III	4505631	4507178	1548
644	III	4540497	4540966	470
645	III	4568334	4568646	313
646	III	4648769	4649793	1025
647	III	4779842	4780279	438
648	III	4899581	4900088	508
649	III	5014898	5015435	538
650	III	5077036	5077661	626
651	III	5078055	5078641	587
652	III	5089484	5089834	351
653	III	5101592	5102075	484
654	III	5102249	5102680	432
655	III	5108792	5109225	434
656	III	5146345	5147017	673
657	III	5200286	5200884	599
658	III	5201121	5202236	1116
659	III	5202494	5203711	1218
660	III	5267154	5268003	850
661	III	5354938	5355605	668
662	III	5357456	5358348	893
663	III	5368034	5368637	604
664	III	5501448	5502503	1056
665	III	5502779	5503540	762
666	III	5546344	5546991	648
667	III	5552295	5553650	1356
668	III	5621144	5621575	432
669	III	5715157	5715770	614
670	III	5812610	5813316	707
671	III	5813594	5814281	688
672	III	5814850	5815130	281
673	III	5835449	5835990	542
674	III	5838011	5838742	732
675	III	5839019	5839763	745
676	III	5840344	5841200	857
677	III	5863664	5864000	337
678	III	5876791	5877576	786
679	III	5900834	5901117	284
680	III	5937950	5939200	1251
681	III	5939439	5940023	585
682	III	5948355	5949169	815
683	III	5964279	5964604	326
684	III	6116768	6117425	658
685	III	6144584	6146185	1602
686	III	6158701	6159602	902
687	III	6178776	6179590	815
688	III	6180225	6180742	518
689	III	6185331	6186069	739
690	III	6231787	6232343	557
691	III	6278373	6278973	601
692	III	6279975	6280640	666
693	III	6360017	6362050	2034
694	III	6375049	6375368	320
695	III	6395814	6397138	1325
696	III	6402854	6403135	282
697	III	6420017	6423221	3205
698	III	6442186	6443182	997
699	III	6444286	6444787	502
700	III	6453606	6453995	390
701	III	6464055	6464815	761
702	III	6551755	6552094	340
703	III	6604300	6604904	605
704	III	6849799	6850628	830
705	III	6857294	6857993	700
706	III	6895115	6896371	1257
707	III	6897498	6898128	631
708	III	6961994	6962486	493
709	III	6988907	6990245	1339
710	III	6990984	6991821	838
711	III	7029470	7030578	1109
712	III	7116156	7117049	894
713	III	7118381	7119570	1190
714	III	7120323	7120971	649
715	III	7153800	7156174	2375
716	III	7165776	7166300	525
717	III	7199357	7200154	798
718	III	7210595	7211137	543
719	III	7270981	7271701	721
720	III	7272076	7273331	1256
721	III	7317384	7317839	456
722	III	7335152	7335744	593
723	III	7363275	7363879	605
724	III	7363945	7364597	653
725	III	7375353	7375942	590
726	III	7453623	7454193	571
727	III	7465388	7465792	405
728	III	7498013	7498719	707
729	III	7504507	7505099	593
730	III	7570097	7570773	677
731	III	7583906	7584455	550
732	III	7717870	7718912	1043
733	III	7719355	7720595	1241
734	III	7720810	7721760	951
735	III	7728401	7729059	659
736	III	7730150	7730689	540
737	III	7865249	7865569	321
738	III	7891734	7892719	986
739	III	7959040	7959642	603
740	III	7973802	7974678	877
741	III	8124322	8124793	472
742	III	8125194	8126251	1058
743	III	8126717	8127280	564
744	III	8240064	8240700	637
745	III	8244037	8244329	293
746	III	8291193	8291983	791
747	III	8326013	8326439	427
748	III	8356316	8356923	608
749	III	8411798	8412431	634
750	III	8417243	8418126	884
751	III	8424981	8425693	713
752	III	8656846	8657378	533
753	III	8657618	8658816	1199
754	III	8688521	8688966	446
755	III	8696679	8697257	579
756	III	8732883	8734085	1203
757	III	8734263	8735110	848
758	III	8739067	8739520	454
759	III	8749396	8749967	572
760	III	8772490	8773018	529
761	III	8782157	8783464	1308
762	III	8785333	8785832	500
763	III	8794065	8795261	1197
764	III	8795382	8796171	790
765	III	8797169	8797900	732
766	III	8801520	8802499	980
767	III	8868259	8868792	534
768	III	8983169	8984175	1007
769	III	8984349	8984842	494
770	III	8986731	8987304	574
771	III	9007057	9007648	592
772	III	9058909	9059244	336
773	III	9175886	9176239	354
774	III	9237525	9238015	491
775	III	9254737	9255412	676
776	III	9268983	9269487	505
777	III	9289523	9290217	695
778	III	9326474	9326893	420
779	III	9456042	9456601	560
780	III	9474624	9475081	458
781	III	9475573	9476453	881
782	III	9500329	9500758	430
783	III	9619118	9620012	895
784	III	9622000	9622468	469
785	III	9638192	9638795	604
786	III	9664765	9665264	500
787	III	9665327	9668842	3516
788	III	9696988	9697804	817
789	III	9698530	9699053	524
790	III	9719817	9720590	774
791	III	9721962	9722436	475
792	III	9807392	9808017	626
793	III	9825354	9826510	1157
794	III	9827162	9827863	702
795	III	9848275	9848642	368
796	III	9849979	9850574	596
797	III	9850820	9851393	574
798	III	9857126	9858793	1668
799	III	9912736	9914140	1405
800	III	9922255	9922626	372
801	III	9930390	9930973	584
802	III	9932006	9932467	462
803	III	9956616	9957029	414
804	III	10095348	10095703	356
805	III	10096343	10096911	569
806	III	10216707	10217417	711
807	III	10224686	10225474	789
808	III	10533252	10533862	611
809	III	10534040	10534714	675
810	III	10628380	10628765	386
811	III	10717342	10717868	527
812	III	11004725	11006376	1652
813	III	11197282	11197531	250
814	III	11240761	11241224	464
815	III	11243336	11243798	463
816	III	11444890	11445361	472
817	III	11689296	11689765	470
818	III	12003147	12003686	540
819	III	12318843	12319236	394
820	III	12325240	12325721	482
821	III	12327650	12328001	352
822	III	12335372	12335835	464
823	III	12614567	12615167	601
824	III	12658466	12659099	634
825	III	12839246	12839749	504
826	III	13062449	13062989	541
827	III	13527759	13528158	400
828	III	13528472	13529011	540
829	III	13544510	13545064	555
830	III	13694059	13694444	386
831	III	13748668	13749275	608
832	III	13766550	13767392	843
833	IV	50952	51582	631
834	IV	210424	211280	857
835	IV	274110	275003	894
836	IV	275134	275613	480
837	IV	280268	280657	390
838	IV	291716	292367	652
839	IV	294181	295387	1207
840	IV	295556	296512	957
841	IV	296776	297204	429
842	IV	428943	429308	366
843	IV	620964	621412	449
844	IV	626005	626778	774
845	IV	675810	676122	313
846	IV	781091	781398	308
847	IV	782399	782739	341
848	IV	891001	891323	323
849	IV	903548	903824	277
850	IV	907578	907957	380
851	IV	1035208	1035491	284
852	IV	1454973	1455601	629
853	IV	1476283	1476987	705
854	IV	1496186	1496559	374
855	IV	1497382	1497767	386
856	IV	1553302	1553754	453
857	IV	1624514	1624958	445
858	IV	1655326	1655626	301
859	IV	1859309	1859804	496
860	IV	2281112	2281883	772
861	IV	2601866	2602800	935
862	IV	2798448	2798905	458
863	IV	2841037	2841697	661
864	IV	3227609	3228129	521
865	IV	3384527	3384882	356
866	IV	3611883	3612512	630
867	IV	3742191	3742804	614
868	IV	3874483	3874719	237
869	IV	3941976	3942318	343
870	IV	4019057	4020342	1286
871	IV	4027383	4027864	482
872	IV	4093056	4093479	424
873	IV	4212572	4213084	513
874	IV	4276288	4276764	477
875	IV	4277601	4278150	550
876	IV	4284983	4285514	532
877	IV	4294463	4295139	677
878	IV	4386058	4386499	442
879	IV	4405806	4406638	833
880	IV	4406918	4407168	251
881	IV	4449680	4450210	531
882	IV	4469798	4470592	795
883	IV	4477965	4478324	360
884	IV	4478471	4479008	538
885	IV	4544336	4544665	330
886	IV	4748541	4748970	430
887	IV	4788279	4788872	594
888	IV	4821163	4821565	403
889	IV	4821773	4822331	559
890	IV	5082856	5083553	698
891	IV	5377221	5377456	236
892	IV	5388719	5389193	475
893	IV	5589789	5590665	877
894	IV	5590788	5591607	820
895	IV	5654017	5654626	610
896	IV	5655738	5657554	1817
897	IV	5658044	5660084	2041
898	IV	5665093	5666839	1747
899	IV	5667007	5667571	565
900	IV	5749835	5750404	570
901	IV	5753345	5754615	1271
902	IV	5755829	5756596	768
903	IV	5762683	5763180	498
904	IV	5764282	5764790	509
905	IV	5778113	5778914	802
906	IV	5966891	5967551	661
907	IV	6083527	6084084	558
908	IV	6093389	6093902	514
909	IV	6097020	6097884	865
910	IV	6248432	6248780	349
911	IV	6327581	6328193	613
912	IV	6357862	6361012	3151
913	IV	6441804	6442600	797
914	IV	6469009	6469756	748
915	IV	6474429	6475301	873
916	IV	6554787	6556826	2040
917	IV	6576693	6577139	447
918	IV	6756244	6756574	331
919	IV	6790407	6790923	517
920	IV	6802147	6802602	456
921	IV	6879289	6880148	860
922	IV	7016522	7016859	338
923	IV	7024716	7025170	455
924	IV	7045555	7046015	461
925	IV	7046160	7050442	4283
926	IV	7180001	7180614	614
927	IV	7188470	7189338	869
928	IV	7190370	7190794	425
929	IV	7234836	7236000	1165
930	IV	7237463	7238217	755
931	IV	7319869	7320607	739
932	IV	7497211	7497523	313
933	IV	7553116	7553650	535
934	IV	7678944	7679447	504
935	IV	7710748	7711173	426
936	IV	7784039	7784367	329
937	IV	7791960	7792489	530
938	IV	7829237	7829825	589
939	IV	7844272	7844699	428
940	IV	7845550	7845976	427
941	IV	7898598	7898913	316
942	IV	7946786	7947313	528
943	IV	8027904	8028656	753
944	IV	8073201	8073527	327
945	IV	8133556	8133963	408
946	IV	8146161	8146662	502
947	IV	8151779	8152188	410
948	IV	8163569	8164259	691
949	IV	8170297	8170693	397
950	IV	8199780	8200128	349
951	IV	8225291	8225763	473
952	IV	8228727	8230642	1916
953	IV	8233153	8234534	1382
954	IV	8239506	8239923	418
955	IV	8240696	8241590	895
956	IV	8249896	8250947	1052
957	IV	8251250	8251822	573
958	IV	8260628	8261408	781
959	IV	8266178	8266954	777
960	IV	8379330	8379721	392
961	IV	8380157	8380678	522
962	IV	8453053	8453568	516
963	IV	8453955	8454581	627
964	IV	8475211	8476457	1247
965	IV	8481201	8481584	384
966	IV	8525819	8530021	4203
967	IV	8530074	8531495	1422
968	IV	8531856	8535557	3702
969	IV	8537898	8538468	571
970	IV	8539214	8540749	1536
971	IV	8542278	8542694	417
972	IV	8585134	8586237	1104
973	IV	8612146	8612590	445
974	IV	8614687	8615064	378
975	IV	8650573	8651136	564
976	IV	8730496	8730835	340
977	IV	8793142	8793910	769
978	IV	8794790	8795692	903
979	IV	8830527	8831539	1013
980	IV	8865304	8865843	540
981	IV	8948990	8950231	1242
982	IV	8952118	8952764	647
983	IV	8973219	8973710	492
984	IV	9062584	9064022	1439
985	IV	9158964	9159416	453
986	IV	9159722	9160382	661
987	IV	9197988	9198856	869
988	IV	9198899	9199878	980
989	IV	9310982	9312319	1338
990	IV	9377223	9378778	1556
991	IV	9399375	9399730	356
992	IV	9401703	9402131	429
993	IV	9441190	9442915	1726
994	IV	9444306	9444817	512
995	IV	9511393	9511879	487
996	IV	9513082	9513934	853
997	IV	9525696	9526464	769
998	IV	9537329	9537944	616
999	IV	9647746	9648332	587
1000	IV	9651043	9651741	699
1001	IV	9653240	9653645	406
1002	IV	9667950	9668639	690
1003	IV	9669656	9670515	860
1004	IV	9670786	9671459	674
1005	IV	9672014	9672917	904
1006	IV	9673743	9674473	731
1007	IV	9676129	9678503	2375
1008	IV	9682490	9682783	294
1009	IV	9716313	9716975	663
1010	IV	9717918	9718926	1009
1011	IV	9735689	9736334	646
1012	IV	9737114	9737931	818
1013	IV	9756957	9757462	506
1014	IV	9797573	9798852	1280
1015	IV	9799729	9800030	302
1016	IV	9801261	9801965	705
1017	IV	9802507	9803226	720
1018	IV	9803456	9804059	604
1019	IV	9804580	9804998	419
1020	IV	9825143	9825404	262
1021	IV	9851350	9851911	562
1022	IV	9869106	9869617	512
1023	IV	9872669	9873226	558
1024	IV	9873699	9874240	542
1025	IV	9875386	9876162	777
1026	IV	9993433	9994188	756
1027	IV	9998396	9999276	881
1028	IV	10058495	10058941	447
1029	IV	10059067	10059754	688
1030	IV	10059830	10060404	575
1031	IV	10060629	10061396	768
1032	IV	10175150	10175653	504
1033	IV	10180129	10180936	808
1034	IV	10235422	10236517	1096
1035	IV	10242994	10243493	500
1036	IV	10252161	10253675	1515
1037	IV	10331632	10332416	785
1038	IV	10342156	10342791	636
1039	IV	10349723	10350381	659
1040	IV	10380742	10381121	380
1041	IV	10420150	10421413	1264
1042	IV	10462626	10463620	995
1043	IV	10466197	10466994	798
1044	IV	10467084	10467800	717
1045	IV	10483675	10484056	382
1046	IV	10502247	10503018	772
1047	IV	10511253	10511889	637
1048	IV	10606514	10606970	457
1049	IV	10612437	10612869	433
1050	IV	10630989	10631594	606
1051	IV	10656597	10657503	907
1052	IV	10659969	10661673	1705
1053	IV	10694165	10694605	441
1054	IV	10761305	10761813	509
1055	IV	10795371	10796526	1156
1056	IV	10798264	10798868	605
1057	IV	10808343	10809126	784
1058	IV	10810663	10811296	634
1059	IV	10820037	10820574	538
1060	IV	10909464	10910299	836
1061	IV	10913646	10914130	485
1062	IV	10915281	10915824	544
1063	IV	10919154	10919647	494
1064	IV	10935223	10937208	1986
1065	IV	10970248	10970931	684
1066	IV	10971543	10972157	615
1067	IV	11015763	11016264	502
1068	IV	11021045	11021669	625
1069	IV	11027540	11028125	586
1070	IV	11029396	11029873	478
1071	IV	11125229	11125698	470
1072	IV	11180021	11180528	508
1073	IV	11211566	11212443	878
1074	IV	11257705	11258139	435
1075	IV	11259464	11260074	611
1076	IV	11283974	11284711	738
1077	IV	11298750	11298972	223
1078	IV	11315840	11316813	974
1079	IV	11487767	11488552	786
1080	IV	11488946	11489346	401
1081	IV	11522359	11523043	685
1082	IV	11593267	11594758	1492
1083	IV	11623531	11624176	646
1084	IV	11691413	11691930	518
1085	IV	11692416	11692874	459
1086	IV	11821912	11822828	917
1087	IV	11897345	11898076	732
1088	IV	11912853	11915258	2406
1089	IV	11915632	11916483	852
1090	IV	11916705	11917428	724
1091	IV	11917773	11918241	469
1092	IV	11952526	11952862	337
1093	IV	11955510	11957821	2312
1094	IV	11961562	11962361	800
1095	IV	12021362	12021708	347
1096	IV	12044860	12045580	721
1097	IV	12046318	12047281	964
1098	IV	12600999	12601384	386
1099	IV	12689709	12690175	467
1100	IV	12715775	12716559	785
1101	IV	12833782	12834707	926
1102	IV	12835335	12835927	593
1103	IV	12840171	12840613	443
1104	IV	12841825	12842625	801
1105	IV	12869430	12869760	331
1106	IV	12871158	12871454	297
1107	IV	12871561	12871979	419
1108	IV	12905424	12905722	299
1109	IV	12906555	12907053	499
1110	IV	12910031	12910367	337
1111	IV	13026649	13027288	640
1112	IV	13075548	13076130	583
1113	IV	13252463	13252810	348
1114	IV	13253784	13254224	441
1115	IV	13313022	13313523	502
1116	IV	13314041	13314705	665
1117	IV	13318404	13319311	908
1118	IV	13322332	13323017	686
1119	IV	13327055	13327420	366
1120	IV	13334164	13334583	420
1121	IV	13393155	13393868	714
1122	IV	13396339	13396805	467
1123	IV	13826256	13826746	491
1124	IV	13887353	13888036	684
1125	IV	14032840	14033960	1121
1126	IV	14050383	14050824	442
1127	IV	14326807	14327447	641
1128	IV	14414043	14414848	806
1129	IV	14445057	14445602	546
1130	IV	14589863	14590241	379
1131	IV	14593820	14594845	1026
1132	IV	14606391	14606744	354
1133	IV	14609626	14611943	2318
1134	IV	14612089	14613419	1331
1135	IV	14614082	14614586	505
1136	IV	14619895	14621456	1562
1137	IV	14776631	14777081	451
1138	IV	14786697	14787178	482
1139	IV	14874840	14875431	592
1140	IV	14883820	14884280	461
1141	IV	15076899	15077851	953
1142	IV	15081116	15081933	818
1143	IV	15385186	15385641	456
1144	IV	15646478	15646949	472
1145	IV	15849675	15849967	293
1146	IV	16169605	16170022	418
1147	IV	16178402	16178818	417
1148	IV	16180590	16181330	741
1149	IV	16359214	16359577	364
1150	IV	16491288	16491956	669
1151	IV	17060928	17061273	346
1152	IV	17244788	17245559	772
1153	IV	17263800	17264138	339
1154	IV	17342185	17342634	450
1155	IV	17405869	17406685	817
1156	IV	17467784	17468468	685
1157	V	59081	59316	236
1158	V	151355	151775	421
1159	V	155083	155781	699
1160	V	203798	204257	460
1161	V	211588	212230	643
1162	V	266815	267042	228
1163	V	333385	334178	794
1164	V	384563	384884	322
1165	V	459408	459840	433
1166	V	477642	478219	578
1167	V	483460	483864	405
1168	V	484061	485071	1011
1169	V	493835	494745	911
1170	V	532000	532352	353
1171	V	727832	728537	706
1172	V	730173	730665	493
1173	V	731162	731861	700
1174	V	903143	904013	871
1175	V	1100315	1100639	325
1176	V	1176231	1176622	392
1177	V	1456706	1457223	518
1178	V	1474586	1475054	469
1179	V	1621436	1622039	604
1180	V	1966959	1967371	413
1181	V	2055967	2056426	460
1182	V	2066862	2067212	351
1183	V	2109267	2109582	316
1184	V	2122565	2122985	421
1185	V	2123076	2123678	603
1186	V	2126594	2127142	549
1187	V	2136987	2137630	644
1188	V	2192153	2192606	454
1189	V	2201214	2201725	512
1190	V	2214708	2215060	353
1191	V	2218851	2219311	461
1192	V	2235795	2236190	396
1193	V	2250018	2250573	556
1194	V	2259773	2260113	341
1195	V	2281561	2281913	353
1196	V	2308177	2308800	624
1197	V	2321412	2324834	3423
1198	V	2325005	2325719	715
1199	V	2327028	2327684	657
1200	V	2329138	2331554	2417
1201	V	2615179	2615661	483
1202	V	2730922	2731518	597
1203	V	2765044	2765351	308
1204	V	2872277	2872589	313
1205	V	3094369	3094718	350
1206	V	3391007	3391511	505
1207	V	3468354	3468917	564
1208	V	3505846	3506241	396
1209	V	3579750	3580631	882
1210	V	3632226	3632557	332
1211	V	3634466	3634867	402
1212	V	3644295	3644675	381
1213	V	3703907	3704305	399
1214	V	3843902	3844348	447
1215	V	3935869	3936333	465
1216	V	3962406	3962844	439
1217	V	3967461	3968275	815
1218	V	3969644	3970027	384
1219	V	4024701	4025162	462
1220	V	4131236	4132001	766
1221	V	4143068	4143415	348
1222	V	4185996	4186512	517
1223	V	4186603	4187112	510
1224	V	4482924	4483530	607
1225	V	4640576	4641163	588
1226	V	4847398	4847828	431
1227	V	4862654	4863222	569
1228	V	4889466	4889898	433
1229	V	4899928	4900378	451
1230	V	4964663	4965408	746
1231	V	5031790	5032579	790
1232	V	5049396	5049875	480
1233	V	5064802	5065655	854
1234	V	5080759	5081503	745
1235	V	5177999	5178353	355
1236	V	5192414	5193036	623
1237	V	5271568	5272538	971
1238	V	5272775	5273602	828
1239	V	5329620	5330236	617
1240	V	5393013	5393504	492
1241	V	5426527	5427038	512
1242	V	5509891	5510333	443
1243	V	5512589	5512965	377
1244	V	5580505	5580889	385
1245	V	5640525	5640971	447
1246	V	5687420	5688199	780
1247	V	5695528	5696121	594
1248	V	5712629	5713125	497
1249	V	5747460	5747882	423
1250	V	5763479	5764487	1009
1251	V	5790203	5791044	842
1252	V	5812896	5813571	676
1253	V	5814763	5815157	395
1254	V	5815997	5816786	790
1255	V	5819717	5820514	798
1256	V	5821421	5822410	990
1257	V	5822832	5823700	869
1258	V	5824382	5825009	628
1259	V	5843006	5844007	1002
1260	V	5844259	5845171	913
1261	V	5845328	5846553	1226
1262	V	5847776	5848356	581
1263	V	5930507	5931201	695
1264	V	6043541	6044288	748
1265	V	6053237	6053756	520
1266	V	6100654	6101009	356
1267	V	6211443	6211913	471
1268	V	6212350	6213291	942
1269	V	6227404	6228119	716
1270	V	6228350	6231192	2843
1271	V	6238540	6239295	756
1272	V	6239841	6240434	594
1273	V	6240595	6241477	883
1274	V	6242840	6244256	1417
1275	V	6246423	6247911	1489
1276	V	6248117	6248466	350
1277	V	6251001	6251866	866
1278	V	6267314	6267599	286
1279	V	6275154	6276886	1733
1280	V	6277052	6278990	1939
1281	V	6292288	6292760	473
1282	V	6319233	6319686	454
1283	V	6346807	6347822	1016
1284	V	6400472	6401028	557
1285	V	6408763	6409384	622
1286	V	6411183	6411609	427
1287	V	6412912	6413458	547
1288	V	6425918	6426387	470
1289	V	6428740	6429257	518
1290	V	6429984	6431578	1595
1291	V	6436177	6436663	487
1292	V	6450267	6450945	679
1293	V	6462459	6463555	1097
1294	V	6488874	6489357	484
1295	V	6498468	6499188	721
1296	V	6522809	6523488	680
1297	V	6524482	6525176	695
1298	V	6606286	6606796	511
1299	V	6656879	6657352	474
1300	V	6665633	6666292	660
1301	V	6666605	6667075	471
1302	V	6676157	6676599	443
1303	V	6691644	6692302	659
1304	V	6796824	6797351	528
1305	V	6881635	6882191	557
1306	V	6982369	6982956	588
1307	V	6993066	6994504	1439
1308	V	6997161	6997739	579
1309	V	6998017	6998933	917
1310	V	7075375	7076505	1131
1311	V	7093542	7094514	973
1312	V	7095172	7096107	936
1313	V	7096301	7097158	858
1314	V	7145131	7145972	842
1315	V	7150459	7151216	758
1316	V	7153148	7154469	1322
1317	V	7155794	7157593	1800
1318	V	7163414	7164123	710
1319	V	7198287	7198869	583
1320	V	7364071	7364432	362
1321	V	7412973	7413775	803
1322	V	7414902	7416613	1712
1323	V	7432266	7433437	1172
1324	V	7521305	7521755	451
1325	V	7681444	7681733	290
1326	V	7719407	7720462	1056
1327	V	7809802	7810235	434
1328	V	7853953	7854270	318
1329	V	7855265	7855589	325
1330	V	7978148	7978545	398
1331	V	8000715	8001449	735
1332	V	8021951	8022604	654
1333	V	8178783	8179351	569
1334	V	8217573	8218127	555
1335	V	8268970	8269819	850
1336	V	8269864	8270224	361
1337	V	8306940	8307430	491
1338	V	8307672	8308057	386
1339	V	8383481	8384162	682
1340	V	8384192	8384928	737
1341	V	8402229	8402935	707
1342	V	8424273	8424809	537
1343	V	8425140	8425761	622
1344	V	8425902	8427551	1650
1345	V	8434311	8434888	578
1346	V	8445558	8446084	527
1347	V	8460321	8460763	443
1348	V	8587040	8587280	241
1349	V	8603254	8603787	534
1350	V	8610488	8611424	937
1351	V	8643217	8643505	289
1352	V	8651128	8652044	917
1353	V	8652534	8653240	707
1354	V	8653324	8654018	695
1355	V	8654844	8655559	716
1356	V	8657909	8658847	939
1357	V	8661306	8662008	703
1358	V	8767477	8768774	1298
1359	V	8768927	8769513	587
1360	V	8773779	8774210	432
1361	V	8934991	8935607	617
1362	V	8936860	8937452	593
1363	V	8948848	8949762	915
1364	V	8974993	8975812	820
1365	V	8977421	8978167	747
1366	V	9076804	9077556	753
1367	V	9077974	9080465	2492
1368	V	9084181	9091114	6934
1369	V	9095094	9096161	1068
1370	V	9098165	9098925	761
1371	V	9146218	9147711	1494
1372	V	9147935	9149432	1498
1373	V	9152114	9152670	557
1374	V	9172974	9173484	511
1375	V	9202677	9203742	1066
1376	V	9218655	9219073	419
1377	V	9243371	9243779	409
1378	V	9253889	9254510	622
1379	V	9255424	9256047	624
1380	V	9324130	9324651	522
1381	V	9327549	9328425	877
1382	V	9328609	9329028	420
1383	V	9333404	9334553	1150
1384	V	9344079	9345181	1103
1385	V	9356180	9356699	520
1386	V	9424768	9425180	413
1387	V	9491516	9492364	849
1388	V	9492412	9492902	491
1389	V	9503400	9503652	253
1390	V	9506950	9507223	274
1391	V	9507507	9508255	749
1392	V	9516215	9516806	592
1393	V	9526535	9527039	505
1394	V	9654115	9654697	583
1395	V	9679122	9679523	402
1396	V	9709683	9710332	650
1397	V	9710970	9711414	445
1398	V	9729860	9730433	574
1399	V	9730792	9732164	1373
1400	V	9856471	9856792	322
1401	V	9888983	9889402	420
1402	V	9889458	9890073	616
1403	V	9925666	9926055	390
1404	V	9984796	9985846	1051
1405	V	10003172	10004070	899
1406	V	10030975	10031951	977
1407	V	10033271	10033667	397
1408	V	10040526	10041255	730
1409	V	10042198	10042857	660
1410	V	10098516	10098856	341
1411	V	10104784	10105106	323
1412	V	10110982	10111337	356
1413	V	10178249	10178685	437
1414	V	10203212	10204084	873
1415	V	10244279	10244763	485
1416	V	10255790	10256532	743
1417	V	10281354	10281942	589
1418	V	10333721	10334246	526
1419	V	10357366	10358020	655
1420	V	10371113	10371735	623
1421	V	10395359	10395878	520
1422	V	10398278	10398957	680
1423	V	10399206	10399685	480
1424	V	10432532	10433076	545
1425	V	10433476	10433967	492
1426	V	10466464	10467616	1153
1427	V	10467922	10468860	939
1428	V	10483915	10484476	562
1429	V	10485321	10486049	729
1430	V	10536030	10537160	1131
1431	V	10546754	10547362	609
1432	V	10562948	10563527	580
1433	V	10580745	10581081	337
1434	V	10589689	10590539	851
1435	V	10681095	10682051	957
1436	V	10693680	10694445	766
1437	V	10714950	10715223	274
1438	V	10719685	10720229	545
1439	V	10725335	10725900	566
1440	V	10726648	10726955	308
1441	V	10728944	10730003	1060
1442	V	10801917	10802410	494
1443	V	10855239	10856028	790
1444	V	10856959	10857384	426
1445	V	10857808	10860566	2759
1446	V	10861560	10862461	902
1447	V	10870017	10871085	1069
1448	V	10871195	10872096	902
1449	V	10877760	10878974	1215
1450	V	10890950	10891469	520
1451	V	10897144	10897481	338
1452	V	10901058	10901554	497
1453	V	10932138	10932940	803
1454	V	10936572	10937982	1411
1455	V	10938658	10939303	646
1456	V	10939784	10941372	1589
1457	V	10951276	10952919	1644
1458	V	10954801	10955553	753
1459	V	10955703	10956108	406
1460	V	10960550	10960979	430
1461	V	10961513	10961934	422
1462	V	10967944	10968397	454
1463	V	11007456	11008154	699
1464	V	11008871	11009609	739
1465	V	11046684	11047277	594
1466	V	11069153	11069919	767
1467	V	11070269	11070880	612
1468	V	11086984	11087699	716
1469	V	11122450	11122939	490
1470	V	11175457	11176024	568
1471	V	11176625	11177192	568
1472	V	11216822	11218037	1216
1473	V	11228782	11229245	464
1474	V	11265271	11265635	365
1475	V	11374626	11375001	376
1476	V	11375135	11375672	538
1477	V	11470062	11470549	488
1478	V	11486092	11486882	791
1479	V	11488656	11489110	455
1480	V	11490246	11491101	856
1481	V	11500995	11501341	347
1482	V	11502406	11503803	1398
1483	V	11504285	11504967	683
1484	V	11505014	11505440	427
1485	V	11531712	11532707	996
1486	V	11534121	11535060	940
1487	V	11535580	11536064	485
1488	V	11537181	11538009	829
1489	V	11569946	11570661	716
1490	V	11572386	11573521	1136
1491	V	11574025	11574965	941
1492	V	11585180	11585601	422
1493	V	11603522	11605146	1625
1494	V	11614419	11615335	917
1495	V	11615707	11616398	692
1496	V	11629336	11629926	591
1497	V	11648143	11648919	777
1498	V	11655212	11655676	465
1499	V	11716875	11717394	520
1500	V	11755982	11756288	307
1501	V	11762848	11763325	478
1502	V	11777843	11778372	530
1503	V	11782813	11783091	279
1504	V	11801062	11801840	779
1505	V	11820405	11821013	609
1506	V	11822439	11823147	709
1507	V	11823438	11824986	1549
1508	V	11858875	11859899	1025
1509	V	11882994	11883498	505
1510	V	11885040	11886447	1408
1511	V	11896426	11896839	414
1512	V	11899820	11900325	506
1513	V	11921177	11921748	572
1514	V	11922143	11922567	425
1515	V	11933214	11933606	393
1516	V	11941540	11941982	443
1517	V	11980094	11980425	332
1518	V	12001968	12003252	1285
1519	V	12013248	12014048	801
1520	V	12083065	12083445	381
1521	V	12091538	12092216	679
1522	V	12100709	12101193	485
1523	V	12103866	12104391	526
1524	V	12113590	12114133	544
1525	V	12115045	12115740	696
1526	V	12300865	12301530	666
1527	V	12301832	12302695	864
1528	V	12347512	12348548	1037
1529	V	12413600	12414167	568
1530	V	12415715	12416054	340
1531	V	12432121	12432552	432
1532	V	12465508	12466146	639
1533	V	12466960	12468250	1291
1534	V	12475245	12476011	767
1535	V	12599300	12599977	678
1536	V	12633916	12634450	535
1537	V	12634788	12635775	988
1538	V	12636077	12636851	775
1539	V	12637003	12639208	2206
1540	V	12733214	12733892	679
1541	V	12763454	12763825	372
1542	V	12792748	12793258	511
1543	V	12794849	12795647	799
1544	V	12795892	12796417	526
1545	V	12796793	12797444	652
1546	V	12798073	12798391	319
1547	V	12822107	12822518	412
1548	V	12849702	12850380	679
1549	V	12852332	12852843	512
1550	V	12876786	12877652	867
1551	V	12909568	12910045	478
1552	V	12921535	12922750	1216
1553	V	12933607	12934122	516
1554	V	12934795	12935417	623
1555	V	12937020	12937496	477
1556	V	13003167	13003794	628
1557	V	13009783	13010281	499
1558	V	13011585	13012671	1087
1559	V	13042622	13043646	1025
1560	V	13046089	13047109	1021
1561	V	13047484	13048087	604
1562	V	13049016	13049861	846
1563	V	13080952	13082176	1225
1564	V	13082256	13083885	1630
1565	V	13085146	13085763	618
1566	V	13085818	13086613	796
1567	V	13092066	13092833	768
1568	V	13130224	13130849	626
1569	V	13212460	13212860	401
1570	V	13262685	13263552	868
1571	V	13267782	13268496	715
1572	V	13268940	13269957	1018
1573	V	13301967	13302491	525
1574	V	13304639	13305015	377
1575	V	13368715	13369060	346
1576	V	13369360	13370137	778
1577	V	13372796	13374325	1530
1578	V	13377100	13377693	594
1579	V	13377784	13378381	598
1580	V	13417956	13418767	812
1581	V	13418782	13419329	548
1582	V	13421641	13421975	335
1583	V	13462855	13463492	638
1584	V	13530597	13531148	552
1585	V	13556626	13557044	419
1586	V	13565063	13565694	632
1587	V	13576893	13577809	917
1588	V	13649796	13650312	517
1589	V	13653782	13654692	911
1590	V	13656105	13657132	1028
1591	V	13657156	13657832	677
1592	V	13658225	13659689	1465
1593	V	13660541	13661119	579
1594	V	13664687	13665224	538
1595	V	13716151	13716975	825
1596	V	13736188	13736507	320
1597	V	13744818	13745354	537
1598	V	13748307	13748917	611
1599	V	13751694	13752303	610
1600	V	13782024	13782724	701
1601	V	13787518	13788700	1183
1602	V	13789021	13790216	1196
1603	V	13872757	13874022	1266
1604	V	13878084	13880575	2492
1605	V	13891544	13893255	1712
1606	V	13908520	13909860	1341
1607	V	14018669	14018942	274
1608	V	14134814	14135402	589
1609	V	14135823	14136700	878
1610	V	14160197	14161066	870
1611	V	14171358	14171742	385
1612	V	14197547	14197958	412
1613	V	14200040	14200613	574
1614	V	14362886	14363369	484
1615	V	14363859	14365373	1515
1616	V	14366474	14366972	499
1617	V	14415142	14415660	519
1618	V	14502833	14503480	648
1619	V	14848436	14849086	651
1620	V	14850463	14850980	518
1621	V	15002340	15002584	245
1622	V	15016825	15017684	860
1623	V	15192374	15192766	393
1624	V	15337821	15338216	396
1625	V	15354544	15355086	543
1626	V	15361105	15361669	565
1627	V	15370573	15370879	307
1628	V	15434246	15435116	871
1629	V	15478703	15479667	965
1630	V	15497737	15498135	399
1631	V	15563998	15564367	370
1632	V	15663934	15664615	682
1633	V	15666713	15667079	367
1634	V	15880081	15881220	1140
1635	V	15978320	15978706	387
1636	V	16071191	16071528	338
1637	V	16080035	16081016	982
1638	V	16081722	16082035	314
1639	V	16100115	16100594	480
1640	V	16143129	16143752	624
1641	V	16160144	16160497	354
1642	V	16338564	16339081	518
1643	V	16592223	16592806	584
1644	V	16595331	16595859	529
1645	V	16605543	16605863	321
1646	V	16707258	16709404	2147
1647	V	16775100	16775509	410
1648	V	16911021	16911491	471
1649	V	17089647	17090403	757
1650	V	17322532	17322884	353
1651	V	17547076	17547398	323
1652	V	17549390	17549810	421
1653	V	17659155	17659685	531
1654	V	17661424	17661991	568
1655	V	17662217	17662660	444
1656	V	17721787	17722257	471
1657	V	17723381	17723873	493
1658	V	17754925	17755294	370
1659	V	18346119	18346439	321
1660	V	18354189	18354621	433
1661	V	18400367	18401782	1416
1662	V	18461296	18461762	467
1663	V	18577480	18577879	400
1664	V	18727711	18728596	886
1665	V	19051398	19051884	487
1666	V	19212270	19212705	436
1667	V	19527642	19527955	314
1668	V	19955234	19955501	268
1669	V	20010952	20011332	381
1670	V	20424242	20424650	409
1671	V	20712262	20713290	1029
1672	V	20728886	20729441	556
1673	V	20776692	20777541	850
1674	V	20777902	20779327	1426
1675	V	20779532	20780135	604
1676	V	20830070	20830556	487
1677	V	20903209	20903976	768
1678	X	440397	440869	473
1679	X	812999	813605	607
1680	X	825911	826299	389
1681	X	827087	827995	909
1682	X	924411	925204	794
1683	X	974669	975181	513
1684	X	977252	977722	471
1685	X	978158	978787	630
1686	X	1010559	1011459	901
1687	X	1093000	1093550	551
1688	X	1125369	1125714	346
1689	X	1272416	1272955	540
1690	X	1302330	1302615	286
1691	X	1336914	1337635	722
1692	X	1337721	1338326	606
1693	X	1446724	1447193	470
1694	X	1454190	1455490	1301
1695	X	1456230	1457285	1056
1696	X	1477997	1478479	483
1697	X	1486085	1486681	597
1698	X	1541063	1541513	451
1699	X	1945527	1946174	648
1700	X	2234011	2234401	391
1701	X	2287868	2288435	568
1702	X	2401897	2402370	474
1703	X	2421969	2422820	852
1704	X	2435409	2435790	382
1705	X	2482643	2483033	391
1706	X	2541061	2541593	533
1707	X	2553278	2553815	538
1708	X	2567760	2568255	496
1709	X	2568880	2569621	742
1710	X	2587991	2588691	701
1711	X	2592683	2593647	965
1712	X	2667728	2668203	476
1713	X	2692921	2693794	874
1714	X	2694966	2695780	815
1715	X	2838669	2839035	367
1716	X	2841804	2842260	457
1717	X	2892719	2893812	1094
1718	X	2903716	2904271	556
1719	X	2931704	2932670	967
1720	X	2970805	2972106	1302
1721	X	2972294	2973069	776
1722	X	3007239	3008001	763
1723	X	3089771	3090287	517
1724	X	3116384	3117645	1262
1725	X	3127437	3128140	704
1726	X	3153112	3153643	532
1727	X	3181930	3182278	349
1728	X	3245906	3246342	437
1729	X	3290038	3290646	609
1730	X	3297914	3298328	415
1731	X	3300617	3300984	368
1732	X	3306524	3307088	565
1733	X	3334026	3334558	533
1734	X	3403033	3403745	713
1735	X	3407984	3409408	1425
1736	X	3494051	3494571	521
1737	X	3500916	3501182	267
1738	X	3505179	3505526	348
1739	X	3533838	3534765	928
1740	X	3548525	3549099	575
1741	X	3563857	3564256	400
1742	X	3572424	3572889	466
1743	X	3576296	3577047	752
1744	X	3600425	3600808	384
1745	X	3605780	3606134	355
1746	X	3613696	3613988	293
1747	X	3728938	3729446	509
1748	X	3820698	3821091	394
1749	X	3822029	3822501	473
1750	X	3823762	3824261	500
1751	X	3824834	3825250	417
1752	X	3831860	3833036	1177
1753	X	3842461	3843035	575
1754	X	3945837	3946084	248
1755	X	3948971	3949500	530
1756	X	3952659	3953138	480
1757	X	3969714	3970225	512
1758	X	4018504	4019424	921
1759	X	4026182	4026604	423
1760	X	4026888	4027440	553
1761	X	4137565	4138173	609
1762	X	4141003	4141584	582
1763	X	4142805	4145564	2760
1764	X	4147480	4148105	626
1765	X	4208442	4210237	1796
1766	X	4215474	4216327	854
1767	X	4222160	4223367	1208
1768	X	4244170	4245720	1551
1769	X	4246139	4246854	716
1770	X	4247098	4247705	608
1771	X	4266366	4266936	571
1772	X	4284034	4284841	808
1773	X	4295054	4295440	387
1774	X	4497864	4498623	760
1775	X	4507145	4507617	473
1776	X	4523441	4524321	881
1777	X	4528794	4529788	995
1778	X	4530141	4531846	1706
1779	X	4531901	4532766	866
1780	X	4564802	4565136	335
1781	X	4635645	4636648	1004
1782	X	4661884	4662776	893
1783	X	4672930	4673677	748
1784	X	4699930	4700614	685
1785	X	4706779	4707271	493
1786	X	4794026	4794595	570
1787	X	4818872	4819287	416
1788	X	4822232	4822686	455
1789	X	4905777	4906277	501
1790	X	4927909	4928717	809
1791	X	4974431	4974928	498
1792	X	5047568	5048559	992
1793	X	5084957	5086049	1093
1794	X	5100537	5101662	1126
1795	X	5105234	5106654	1421
1796	X	5119060	5120333	1274
1797	X	5122109	5123260	1152
1798	X	5159672	5160220	549
1799	X	5207799	5208141	343
1800	X	5211217	5211983	767
1801	X	5213048	5214117	1070
1802	X	5261739	5262417	679
1803	X	5279048	5279496	449
1804	X	5336450	5337163	714
1805	X	5346275	5346783	509
1806	X	5354185	5354828	644
1807	X	5355218	5355758	541
1808	X	5365489	5365920	432
1809	X	5467264	5468190	927
1810	X	5475098	5475567	470
1811	X	5479573	5480311	739
1812	X	5522744	5523534	791
1813	X	5524263	5524746	484
1814	X	5653612	5655341	1730
1815	X	5685946	5686444	499
1816	X	5714012	5714623	612
1817	X	5715336	5715816	481
1818	X	5812669	5813815	1147
1819	X	5814141	5814589	449
1820	X	5839130	5840280	1151
1821	X	5962426	5962752	327
1822	X	5978943	5979278	336
1823	X	5984462	5984915	454
1824	X	6024896	6025447	552
1825	X	6041938	6042811	874
1826	X	6043329	6044028	700
1827	X	6057109	6058142	1034
1828	X	6059242	6059694	453
1829	X	6092092	6092645	554
1830	X	6092984	6093708	725
1831	X	6097151	6097665	515
1832	X	6098326	6098901	576
1833	X	6100591	6101010	420
1834	X	6109397	6109780	384
1835	X	6121241	6122492	1252
1836	X	6129248	6129858	611
1837	X	6240486	6241148	663
1838	X	6248889	6249927	1039
1839	X	6250333	6250894	562
1840	X	6251953	6252384	432
1841	X	6253493	6258150	4658
1842	X	6271598	6272153	556
1843	X	6274056	6274811	756
1844	X	6295956	6296536	581
1845	X	6338364	6338977	614
1846	X	6377854	6378729	876
1847	X	6448819	6449637	819
1848	X	6456487	6457109	623
1849	X	6458334	6458649	316
1850	X	6462439	6463423	985
1851	X	6470792	6471140	349
1852	X	6473719	6474173	455
1853	X	6503032	6503757	726
1854	X	6505649	6506131	483
1855	X	6514370	6514888	519
1856	X	6517368	6517898	531
1857	X	6518414	6519192	779
1858	X	6522356	6523315	960
1859	X	6530694	6531278	585
1860	X	6536359	6537201	843
1861	X	6537891	6538783	893
1862	X	6551084	6552303	1220
1863	X	6606608	6607187	580
1864	X	6642707	6643547	841
1865	X	6646426	6647341	916
1866	X	6653106	6654636	1531
1867	X	6655046	6655567	522
1868	X	6656777	6657147	371
1869	X	6665066	6666190	1125
1870	X	6667447	6668729	1283
1871	X	6668842	6669382	541
1872	X	6728786	6729905	1120
1873	X	6735336	6739836	4501
1874	X	6740952	6742491	1540
1875	X	6743528	6745321	1794
1876	X	6747019	6751100	4082
1877	X	6784198	6784664	467
1878	X	6788846	6789654	809
1879	X	6790231	6790922	692
1880	X	6792609	6792924	316
1881	X	6804467	6805463	997
1882	X	6806943	6808020	1078
1883	X	6808576	6809184	609
1884	X	6817900	6818553	654
1885	X	6819691	6820473	783
1886	X	7019184	7019856	673
1887	X	7170876	7171381	506
1888	X	7199759	7200921	1163
1889	X	7200964	7201342	379
1890	X	7232319	7232833	515
1891	X	7233051	7234250	1200
1892	X	7242694	7243275	582
1893	X	7243585	7245288	1704
1894	X	7260669	7260938	270
1895	X	7264860	7265348	489
1896	X	7290483	7292237	1755
1897	X	7296092	7296742	651
1898	X	7303166	7303549	384
1899	X	7305534	7306186	653
1900	X	7306405	7306979	575
1901	X	7314698	7315046	349
1902	X	7315285	7316035	751
1903	X	7316471	7317303	833
1904	X	7320229	7320758	530
1905	X	7334025	7334842	818
1906	X	7340767	7341371	605
1907	X	7445712	7446180	469
1908	X	7478128	7478634	507
1909	X	7558805	7559512	708
1910	X	7569880	7570551	672
1911	X	7575534	7576981	1448
1912	X	7578398	7578778	381
1913	X	7660994	7662161	1168
1914	X	7725608	7726003	396
1915	X	7727515	7728065	551
1916	X	7793575	7794214	640
1917	X	7811797	7812513	717
1918	X	7814584	7815057	474
1919	X	7822723	7823513	791
1920	X	7951225	7953378	2154
1921	X	7962028	7963406	1379
1922	X	7997764	7998435	672
1923	X	8014269	8015175	907
1924	X	8018351	8019209	859
1925	X	8019526	8020245	720
1926	X	8069152	8069778	627
1927	X	8074416	8074933	518
1928	X	8077822	8078940	1119
1929	X	8083319	8084698	1380
1930	X	8089392	8090327	936
1931	X	8210927	8211622	696
1932	X	8235960	8237094	1135
1933	X	8238466	8239293	828
1934	X	8241887	8242333	447
1935	X	8323326	8323737	412
1936	X	8355411	8355882	472
1937	X	8385199	8385952	754
1938	X	8421773	8422499	727
1939	X	8423022	8423696	675
1940	X	8439785	8440938	1154
1941	X	8463234	8463635	402
1942	X	8472908	8473908	1001
1943	X	8475109	8475781	673
1944	X	8476375	8477110	736
1945	X	8477172	8477807	636
1946	X	8480227	8480749	523
1947	X	8548775	8549748	974
1948	X	8549860	8550687	828
1949	X	8563550	8564254	705
1950	X	8567185	8567731	547
1951	X	8672871	8673822	952
1952	X	8674385	8675590	1206
1953	X	8675891	8676621	731
1954	X	8677732	8678468	737
1955	X	8712353	8713114	762
1956	X	8719722	8720323	602
1957	X	8754245	8754961	717
1958	X	8755449	8756630	1182
1959	X	8757011	8757305	295
1960	X	8810944	8811400	457
1961	X	8835759	8836213	455
1962	X	8931619	8933041	1423
1963	X	8933069	8933448	380
1964	X	8933835	8934753	919
1965	X	9210042	9210496	455
1966	X	9213601	9214431	831
1967	X	9247988	9248413	426
1968	X	9264646	9265187	542
1969	X	9271914	9272270	357
1970	X	9369714	9370281	568
1971	X	9427962	9428589	628
1972	X	9430812	9431442	631
1973	X	9438668	9439275	608
1974	X	9441703	9442031	329
1975	X	9446081	9446637	557
1976	X	9465105	9466384	1280
1977	X	9540259	9540924	666
1978	X	9549904	9551624	1721
1979	X	9552187	9552832	646
1980	X	9637413	9638267	855
1981	X	9822581	9822983	403
1982	X	9837964	9839841	1878
1983	X	9863071	9863646	576
1984	X	9882413	9883011	599
1985	X	9932236	9932824	589
1986	X	9933969	9934576	608
1987	X	9954531	9954932	402
1988	X	9957500	9957968	469
1989	X	9958032	9958988	957
1990	X	9964726	9965405	680
1991	X	10051518	10052207	690
1992	X	10052822	10053352	531
1993	X	10053491	10055269	1779
1994	X	10074159	10074657	499
1995	X	10083794	10084622	829
1996	X	10141944	10142547	604
1997	X	10146518	10147146	629
1998	X	10197060	10197642	583
1999	X	10218639	10219444	806
[truncated: 310 more rows]
