# Supplementary material for: A somatic checkpoint through NHR-49/HNF4α governs reproductive investment and longevity in C. elegans
Source: Research Square preprint supplement (doi:10.21203/rs.3.rs-7217416/v1), 2025-09-03
Supplement: Supplementary file 4 [file a93621310e9baeefcd9901b7.xlsx]

## Sheet: Details
	nhr-49(-) vs N2 (A)	List of all genes with log2 fold change and adjusted p-value in nhr-49(-) mutants vs. N2 (no cutoffs applied)
	padj<0.05 (B)	Differentially expressed genes (nhr-49(-) vs. N2) filtered by adjusted p-value < 0.05.
	Down (C)	Downregulated genes in nhr-49(-) vs. N2 (adjusted p-value < 0.05; no log2FC cutoff).
	Up (D)	Upregulated genes in nhr-49(-) vs. N2 (adjusted p-value < 0.05; no log2FC cutoff).

## Sheet: nhr-49(-) vs N2 (A)
Wormbase ID	baseMean	log2FoldChange	lfcSE	p value	Adjusted p value
WBGene00006418	156.195	4.29304	0.464291	5.46442e-22	6.90484e-18
WBGene00001399	189.561	-11.9435	3.20808	5.93255e-16	3.74818e-12
WBGene00011150	86.7894	9.99842	1.4442	4.27535e-15	1.80078e-11
WBGene00015152	99.5839	7.4489	1.01348	9.80182e-15	3.09639e-11
WBGene00004987	288.186	4.44969	0.638513	1.20427e-13	3.04343e-10
WBGene00018731	2006.92	5.55853	0.848967	2.62107e-12	5.51998e-09
WBGene00013939	32.5659	10.1069	2.84112	4.07094e-11	7.34863e-08
WBGene00018903	41.4157	3.31249	0.559943	1.7489e-10	2.76239e-07
WBGene00010062	43.7876	5.97276	1.02068	2.30406e-10	3.23489e-07
WBGene00044471	195.769	4.62004	0.790045	5.52956e-10	6.98716e-07
WBGene00044811	90.8582	3.44241	0.619133	9.52105e-10	1.09371e-06
WBGene00000708	5747.03	2.90624	0.53482	2.47199e-09	2.603e-06
WBGene00004056	69.6163	2.4578	0.475082	9.54913e-09	9.28175e-06
WBGene00019105	152.397	4.17475	0.818611	1.0609e-08	9.57541e-06
WBGene00077616	33.0309	8.16208	1.6932	1.7932e-08	1.51059e-05
WBGene00000732	614.221	-0.115719	0.229335	3.42074e-08	2.70153e-05
WBGene00004055	134.936	2.21933	0.461421	5.51121e-08	3.86887e-05
WBGene00019029	44.9033	3.62026	0.78148	5.44868e-08	3.86887e-05
WBGene00000719	42.8402	-0.00329162	0.13698	7.08297e-08	4.71055e-05
WBGene00000712	1682.21	-0.0415585	0.146543	1.95178e-07	0.000119462
WBGene00017105	189.675	1.68591	0.368875	1.98536e-07	0.000119462
WBGene00008323	11.9644	4.46829	0.976984	2.77844e-07	0.000159583
WBGene00000703	1199.87	-0.0445615	0.148045	3.10784e-07	0.000170742
WBGene00000657	1289.26	-0.0403552	0.145995	4.74262e-07	0.000249699
WBGene00045132	3942.38	3.72447	0.856863	5.05255e-07	0.000255376
WBGene00007283	286.252	2.54561	0.588578	5.73833e-07	0.000278883
WBGene00021818	154.666	-2.04986	0.470643	6.41975e-07	0.000300444
WBGene00021772	15.6921	3.93905	0.934122	7.7323e-07	0.000348947
WBGene00002090	85.027	3.3939	0.811918	1.05454e-06	0.000459489
WBGene00012595	37.2698	-0.0456424	0.148566	1.35566e-06	0.000571003
WBGene00005327	9.44085	8.3828	2.96108	1.42349e-06	0.000580232
WBGene00044292	94.8392	0.148047	0.321535	1.58802e-06	0.000608068
WBGene00045208	62.7872	3.46944	0.846556	1.57177e-06	0.000608068
WBGene00003463	56.2427	-0.0612206	0.158353	2.34214e-06	0.000824371
WBGene00021581	28.8323	2.86856	0.722529	2.34864e-06	0.000824371
WBGene00003470	41.0987	-0.0578165	0.155908	2.22986e-06	0.000824371
WBGene00012867	132.072	-1.70446	0.423702	2.41827e-06	0.000825873
WBGene00003094	108.69	3.52394	0.892037	2.60611e-06	0.0008666
WBGene00009221	41.1635	-2.4117	0.62028	3.07036e-06	0.000994798
WBGene00000256	66.721	-0.0619493	0.158879	3.4615e-06	0.00109349
WBGene00007307	37.7813	-0.0525774	0.152499	3.72192e-06	0.00114708
WBGene00001677	17.8391	3.60856	0.967942	4.64794e-06	0.00139837
WBGene00001387	149.146	-4.50697	1.0731	5.36613e-06	0.00157689
WBGene00003429	64.1109	-0.058706	0.156454	5.52402e-06	0.0015864
WBGene00009397	120.511	1.84717	0.497961	7.33505e-06	0.00205968
WBGene00021996	127.731	-0.0265558	0.140796	8.38325e-06	0.00230284
WBGene00000715	1944.89	-0.072377	0.167409	8.78148e-06	0.00236091
WBGene00000649	43.6593	-0.038432	0.145067	9.24777e-06	0.00238479
WBGene00003457	33.299	-0.0579865	0.155926	9.23312e-06	0.00238479
WBGene00003467	42.2743	-4.09714	1.16268	9.92042e-06	0.00250709
WBGene00019368	20.8568	2.70971	0.744394	1.02066e-05	0.00252883
WBGene00011214	30.895	-0.0484687	0.150064	1.23121e-05	0.00299185
WBGene00000213	13.844	4.43906	1.2298	1.46734e-05	0.00349835
WBGene00020016	13.3508	5.55378	1.54436	1.53774e-05	0.00359832
WBGene00000298	386.768	2.03305	0.581888	1.63937e-05	0.00376637
WBGene00010005	1090.85	4.37486	1.28764	1.79514e-05	0.00393984
WBGene00021993	18.0773	-0.0490953	0.15033	1.79981e-05	0.00393984
WBGene00009192	257.188	1.54821	0.442702	1.83959e-05	0.00393984
WBGene00020900	9.44248	5.09486	1.4324	1.83226e-05	0.00393984
WBGene00044723	13.4862	3.93295	1.17343	2.10329e-05	0.00442954
WBGene00000733	6226.9	-2.26532	0.667794	2.25555e-05	0.00449691
WBGene00000986	45.5912	3.48824	1.01744	2.2585e-05	0.00449691
WBGene00016052	144.891	2.18625	0.644664	2.21052e-05	0.00449691
WBGene00003443	39.6569	-0.0473819	0.149372	2.27764e-05	0.00449691
WBGene00021779	74.0899	-0.10017	0.199793	2.39763e-05	0.00466099
WBGene00022564	101.717	2.04169	0.605406	2.49718e-05	0.00478097
WBGene00023069	6105.3	4.5283	1.37532	2.65947e-05	0.00501568
WBGene00016745	93.112	1.40532	0.418307	3.15582e-05	0.00586425
WBGene00007875	44.8337	-0.0716525	0.166432	3.47338e-05	0.00636081
WBGene00008629	25.9911	-0.0844002	0.179319	3.57318e-05	0.00645009
WBGene00013900	11.454	5.27146	1.59311	3.90286e-05	0.00680673
WBGene00016670	15.9629	5.16233	1.55035	3.93235e-05	0.00680673
WBGene00003246	297.434	-1.50735	0.456943	3.89729e-05	0.00680673
WBGene00013101	8.85123	3.52652	1.07505	4.01325e-05	0.00685289
WBGene00015024	27.7884	-0.0373	0.144564	4.25467e-05	0.00716827
WBGene00017498	111.997	2.18424	0.679803	4.37379e-05	0.00718285
WBGene00001938	64.6825	1.74148	0.544836	4.38026e-05	0.00718285
WBGene00013474	18.3213	-0.0629103	0.159317	4.43386e-05	0.00718285
WBGene00012201	101.841	1.20472	0.373363	4.62964e-05	0.00740508
WBGene00000606	22.397	-0.0385458	0.145062	5.00237e-05	0.00774992
WBGene00007892	90.4806	-2.36887	0.713121	4.97691e-05	0.00774992
WBGene00012139	180.995	1.55197	0.48321	5.02923e-05	0.00774992
WBGene00009787	637.018	-1.56121	0.489291	5.13728e-05	0.00782104
WBGene00005016	21.0038	-0.0352999	0.143756	5.35678e-05	0.00805812
WBGene00004622	1.31376e+06	3.98115	1.29309	5.8692e-05	0.00872508
WBGene00004989	388.28	1.53124	0.489447	6.2947e-05	0.00924882
WBGene00009522	13.9061	3.49131	1.15274	6.40042e-05	0.00929605
WBGene00018099	261.057	-1.52469	0.492638	7.12783e-05	0.0102349
WBGene00044974	39.7295	3.98045	1.32112	7.80896e-05	0.0110404
WBGene00022040	40.7601	3.53609	1.18307	7.86355e-05	0.0110404
WBGene00008681	31.1102	3.10168	1.02994	8.54199e-05	0.0118612
WBGene00001702	39.3779	-0.0730175	0.167624	8.84442e-05	0.0121476
WBGene00219748	15.2166	2.52033	0.850642	0.000104348	0.0141778
WBGene00009903	17.672	3.15681	1.09357	0.000105881	0.0142331
WBGene00004057	100.44	2.32757	0.796971	0.000111126	0.0147809
WBGene00021055	26.8574	1.89192	0.641408	0.000112625	0.0148243
WBGene00000753	22.9655	-0.0275496	0.141037	0.000113844	0.0148302
WBGene00018971	12.7382	3.45409	1.22948	0.000117107	0.0150996
WBGene00017103	29.1765	1.94684	0.670181	0.000120461	0.0153751
WBGene00003424	21.8156	-0.0422654	0.146701	0.000134272	0.0167986
WBGene00011059	1758.95	1.26582	0.437268	0.000133512	0.0167986
WBGene00016054	48.8974	-0.0180375	0.138693	0.000136808	0.0169421
WBGene00019540	2652.98	-0.0965621	0.193621	0.0001381	0.0169421
WBGene00004196	117.238	-1.39421	0.482417	0.000140083	0.01702
WBGene00020860	25.6452	-0.0401495	0.145722	0.000148047	0.0178164
WBGene00004398	19.2379	-0.0330431	0.142828	0.00015039	0.0179277
WBGene00001694	647.921	-1.47281	0.523063	0.000161168	0.0188777
WBGene00015052	195.652	3.82079	1.4267	0.000161348	0.0188777
WBGene00011330	216.324	1.71605	0.61682	0.000167413	0.0194076
WBGene00045171	830.549	3.63864	1.36012	0.00017103	0.0194298
WBGene00302993	42.3201	2.22074	0.802568	0.000173755	0.0194298
WBGene00021335	101.583	1.87818	0.680111	0.000171244	0.0194298
WBGene00016447	68.8481	-0.0446689	0.147835	0.00017329	0.0194298
WBGene00194821	20.5622	3.30012	1.25433	0.000187705	0.0208056
WBGene00017093	25.4235	1.75669	0.645217	0.000191248	0.021014
WBGene00044183	10.1298	3.02944	1.06488	0.000194173	0.0211515
WBGene00000696	10011.5	-1.06646	0.387452	0.000205249	0.0221669
WBGene00003469	17.9383	-0.0446769	0.147826	0.000216874	0.0232239
WBGene00009581	25.7318	-0.0322956	0.142592	0.000225772	0.0237738
WBGene00011114	12.2154	-0.0252034	0.140351	0.000224271	0.0237738
WBGene00000368	84.1916	2.55152	0.978081	0.000233142	0.0243469
WBGene00284858	1994.51	2.49411	0.953652	0.000239019	0.024756
WBGene00021296	248.266	-1.10335	0.408518	0.000247281	0.0252297
WBGene00010769	379.46	1.79966	0.681622	0.000247585	0.0252297
WBGene00017293	1024.45	1.03616	0.387385	0.000266497	0.0269397
WBGene00008358	90.8845	2.29296	0.894926	0.00028259	0.0278522
WBGene00077757	58.5625	2.10385	0.839309	0.000291949	0.0278522
WBGene00001713	91.332	-0.116962	0.225733	0.000291919	0.0278522
WBGene00004904	13.09	-0.0464506	0.148747	0.000290344	0.0278522
WBGene00009902	284.029	1.40889	0.542336	0.000292764	0.0278522
WBGene00012910	24.466	2.33447	0.926091	0.000287608	0.0278522
WBGene00015688	20.3975	-0.0354232	0.143749	0.00028617	0.0278522
WBGene00016440	20.6212	-0.0435088	0.147207	0.000293158	0.0278522
WBGene00011434	402.539	1.04824	0.399125	0.000303088	0.0285807
WBGene00021582	6.53167	3.97274	1.52421	0.000307668	0.028586
WBGene00010563	21.0657	-0.0473317	0.149188	0.000307663	0.028586
WBGene00016833	13.5313	5.22297	2.14514	0.000320378	0.0291683
WBGene00019586	24.4277	-0.057383	0.15517	0.00031688	0.0291683
WBGene00220198	35.2595	3.0734	1.29702	0.000320861	0.0291683
WBGene00022090	9.00673	-0.0281938	0.141192	0.00032496	0.02933
WBGene00007362	143.885	1.25822	0.491991	0.000331828	0.029528
WBGene00021072	6.51591	4.37255	1.66582	0.000331418	0.029528
WBGene00194926	17.0499	2.62934	1.08162	0.000338098	0.0298756
WBGene00000656	4967.38	-1.60459	0.639628	0.000342733	0.0300748
WBGene00045117	9.07951	3.26272	1.28885	0.000364467	0.0317614
WBGene00016659	32.8782	-0.0657709	0.161071	0.000370773	0.0320897
WBGene00018384	48.1603	1.31701	0.53338	0.000378919	0.0325716
WBGene00002259	130.342	1.32725	0.533221	0.000395261	0.0337112
WBGene00022887	80.679	1.64535	0.667364	0.000397513	0.0337112
WBGene00008955	10.7494	-0.0632555	0.158749	0.000402314	0.0338909
WBGene00010486	13.4855	-0.0279578	0.141143	0.000436612	0.0365366
WBGene00007601	23.0201	-0.0388671	0.145099	0.000441407	0.0366948
WBGene00017964	317.157	1.69254	0.705454	0.000457025	0.0377449
WBGene00000757	5773.52	-1.09946	0.45167	0.000473233	0.0385792
WBGene00008577	23.6767	2.53695	1.07129	0.000471563	0.0385792
WBGene00015355	47.2215	-0.0980582	0.194237	0.000483373	0.0391191
WBGene00009215	693.849	1.34076	0.55885	0.000486048	0.0391191
WBGene00011144	365.328	0.919216	0.376958	0.000500461	0.0400242
WBGene00044472	285.823	2.39156	1.03646	0.000514217	0.0406103
WBGene00021662	75.3719	1.58801	0.673034	0.000513039	0.0406103
WBGene00007303	201.414	1.13737	0.471161	0.000521133	0.0406483
WBGene00000668	3880.95	-0.0978416	0.194406	0.000518025	0.0406483
WBGene00220238	67.1581	2.71287	1.18666	0.000526604	0.0408231
WBGene00013035	179.087	1.43491	0.612569	0.000533103	0.0410749
WBGene00010212	170.358	1.62571	0.693049	0.000544575	0.0417046
WBGene00011364	55.5957	1.70971	0.747909	0.000552713	0.0420728
WBGene00010597	5082.34	1.47691	0.643744	0.000575064	0.043512
WBGene00021381	14.8433	-0.0365781	0.144129	0.000590161	0.0441259
WBGene00194985	11.8964	2.56988	1.14605	0.000587546	0.0441259
WBGene00000698	7641.88	-1.77246	0.789203	0.000602613	0.0447919
WBGene00194787	8.3218	-0.0247375	0.140194	0.000635595	0.0469671
WBGene00194997	21.3462	0.0618187	0.157874	0.000671422	0.0493261
WBGene00016322	33.2274	-0.0405356	0.145767	0.000677686	0.049452
WBGene00021207	13.2827	-0.0271006	0.140851	0.000683928	0.049452
WBGene00006986	44.8732	1.31969	0.590504	0.000684876	0.049452
WBGene00005012	11.0032	-0.0296833	0.141596	0.000702759	0.0504549
WBGene00020881	6.69707	3.90148	2.12872	0.000733082	0.0523346
WBGene00016587	68.2887	1.72404	0.791291	0.000749398	0.0531988
WBGene00015153	8.95064	2.2677	1.03845	0.000767236	0.0536599
WBGene00000458	35.8787	1.70561	0.804015	0.000768633	0.0536599
WBGene00014104	8.24771	-0.0237524	0.139935	0.000760524	0.0536599
WBGene00011176	17.3419	-0.0446816	0.147666	0.000777979	0.054014
WBGene00003093	1923.99	1.49291	0.686573	0.000790409	0.0545771
WBGene00235297	13.5643	-0.0354996	0.143676	0.000839232	0.0573218
WBGene00010366	10.2781	-0.0204904	0.139171	0.000838966	0.0573218
WBGene00001158	14.1742	3.15172	1.51285	0.000860399	0.0584516
WBGene00008097	17.1142	2.2055	1.06833	0.00086738	0.0586107
WBGene00000783	54.5599	1.45598	0.698969	0.000874318	0.0587653
WBGene00004965	51.479	-0.0207769	0.139242	0.000880247	0.0588508
WBGene00271827	164.825	3.3872	1.79398	0.000887135	0.0589709
WBGene00009740	1140.07	-0.751654	0.334308	0.000891378	0.0589709
WBGene00045238	24.824	0.0269284	0.140816	0.000902535	0.0593981
WBGene00000988	1257.08	1.15974	0.541559	0.000933842	0.0595961
WBGene00006351	428.856	1.00319	0.462824	0.000923009	0.0595961
WBGene00000699	48.3136	-0.0340256	0.143115	0.000927067	0.0595961
WBGene00001186	372.136	-1.14282	0.530916	0.000929231	0.0595961
WBGene00012637	6.40344	-0.0316922	0.142234	0.000932595	0.0595961
WBGene00005017	13.4208	-0.0382378	0.144755	0.000932043	0.0595961
WBGene00011486	30.0597	1.68874	0.851494	0.000947755	0.0596722
WBGene00017485	1945.84	1.34235	0.644974	0.000949202	0.0596722
WBGene00010613	391.39	1.3838	0.66069	0.000943087	0.0596722
WBGene00020353	8.63424	-0.0223957	0.139598	0.000965056	0.0603686
WBGene00011671	9.88895	3.00601	1.49421	0.000989465	0.0615905
WBGene00018448	10.8809	0.0292063	0.141494	0.000996114	0.0617004
WBGene00219666	24.6034	2.13027	1.11203	0.00104134	0.0638756
WBGene00021641	15.6761	-0.0296473	0.141645	0.0010364	0.0638756
WBGene00008163	10.4256	4.34027	2.18224	0.0010568	0.0645107
WBGene00006650	15191.6	3.39742	1.93748	0.00107269	0.0648706
WBGene00016420	7.80806	-0.0224654	0.13961	0.0010774	0.0648706
WBGene00016680	10.1447	-0.0269819	0.140818	0.0010781	0.0648706
WBGene00045110	21.4015	2.61397	1.50341	0.00108879	0.0648963
WBGene00012062	18.6254	2.02728	1.04033	0.00108575	0.0648963
WBGene00012744	12.3485	2.40571	1.22573	0.00109649	0.0650474
WBGene00021791	9.40775	-0.0272285	0.140848	0.00110163	0.0650474
WBGene00008707	2188.32	-1.21441	0.601287	0.00111611	0.0652925
WBGene00017325	16.7876	-0.0356533	0.143737	0.00111098	0.0652925
WBGene00015514	2782.03	-1.10703	0.547882	0.00112306	0.0653962
WBGene00018119	16.4825	-0.0309924	0.14203	0.00113835	0.0659823
WBGene00006039	28.3634	-0.0598453	0.156498	0.00117228	0.0676387
WBGene00000716	6018.83	-1.13047	0.566914	0.00120239	0.0690414
WBGene00019148	16.7742	-0.0490539	0.149865	0.00120751	0.0690414
WBGene00011446	1174.14	-1.1245	0.564812	0.00124426	0.0703379
WBGene00018803	12.3451	3.09693	1.63769	0.00125737	0.0703379
WBGene00019221	194.528	1.17127	0.59398	0.0012475	0.0703379
WBGene00015908	17.1391	-0.0256151	0.140435	0.00125802	0.0703379
WBGene00013548	26.7895	1.91326	1.0386	0.0012366	0.0703379
WBGene00021619	10.8252	-0.0208846	0.139246	0.00127637	0.070738
WBGene00013449	6.74786	-0.0236559	0.13989	0.00127104	0.070738
WBGene00008360	125.787	2.05538	1.1158	0.00128374	0.0708356
WBGene00007744	74.4865	0.960678	0.47592	0.00131173	0.0720654
WBGene00022188	355.957	-0.917204	0.452819	0.00132658	0.0725657
WBGene00006038	46.1119	-0.0118333	0.137679	0.0013402	0.0726815
WBGene00195016	14.6753	2.75276	1.62013	0.00133972	0.0726815
WBGene00044942	27.6287	2.50832	1.41953	0.00136333	0.07362
WBGene00003452	93.1893	-0.0208605	0.139249	0.00137504	0.0736229
WBGene00008584	89.8007	1.12565	0.581216	0.00137412	0.0736229
WBGene00009096	220.783	1.54395	0.829876	0.00142408	0.0759271
WBGene00044181	5.02632	3.96605	2.03957	0.00145181	0.0766948
WBGene00009959	49.5404	-0.0409276	0.145896	0.00145669	0.0766948
WBGene00018253	12.2299	-0.0238266	0.139936	0.00144958	0.0766948
WBGene00044772	17.7993	2.13247	1.20541	0.00148332	0.0771328
WBGene00000677	3259.98	-0.107152	0.206014	0.00147896	0.0771328
WBGene00009548	7.51156	-0.02134	0.139341	0.00147114	0.0771328
WBGene00001066	68.0783	-0.0138931	0.137967	0.00153228	0.0788601
WBGene00001523	23.4891	1.80437	1.05269	0.0015415	0.0788601
WBGene00011120	6.54301	-0.0228541	0.139687	0.00152994	0.0788601
WBGene00018342	191.734	1.13309	0.603754	0.00154123	0.0788601
WBGene00021412	45.2298	1.32919	0.710155	0.00155933	0.0791315
WBGene00005180	15.9861	2.19205	1.19058	0.00155712	0.0791315
WBGene00009786	6.58056	0.0196672	0.138989	0.00157913	0.0798156
WBGene00000781	5161.5	1.26507	0.689861	0.00159155	0.0799244
WBGene00011401	11.8033	-0.0274773	0.14096	0.00159393	0.0799244
WBGene00009681	27.3212	-0.0144646	0.138041	0.0016047	0.0801464
WBGene00007597	9.07306	-0.0188485	0.138815	0.00166498	0.0828295
WBGene00000608	6965.1	-0.111129	0.211886	0.00168287	0.0828598
WBGene00004394	19.5442	-0.0229263	0.139739	0.00167958	0.0828598
WBGene00045160	5.28322	3.90079	2.25009	0.00168526	0.0828598
WBGene00015929	7.13951	-0.0209106	0.13924	0.00171905	0.0838682
WBGene00020905	8.29557	-0.0287388	0.141242	0.00171245	0.0838682
WBGene00016097	96.0739	0.924198	0.493073	0.00174113	0.0846187
WBGene00004413	6627.1	-1.07787	0.624945	0.00183881	0.0888129
WBGene00005001	88.5289	1.03672	0.587122	0.00184148	0.0888129
WBGene00020326	4.55448	3.82766	2.23105	0.00184914	0.088843
WBGene00003533	8.85684	-0.0311041	0.141965	0.00187174	0.0895883
WBGene00044177	6.16805	-0.0249772	0.140204	0.00188881	0.0900643
WBGene00013931	911.736	1.3727	0.806851	0.00190058	0.0902846
WBGene00015236	101.072	2.12584	1.35488	0.00190975	0.0903807
WBGene00020187	14.0535	-0.0281464	0.141125	0.00192439	0.0907333
WBGene00012294	75.0893	-0.0647802	0.159666	0.001963	0.0916003
WBGene00235094	480.919	1.77042	1.10842	0.00196963	0.0916003
WBGene00045371	15.9367	2.56587	1.62022	0.00197177	0.0916003
WBGene00000681	38.3355	-0.0322442	0.142451	0.00195297	0.0916003
WBGene00018701	633.097	-0.535181	0.265983	0.00199659	0.0924136
WBGene00009470	6.39738	-0.0213813	0.139337	0.00203045	0.0932974
WBGene00013879	11.2762	-0.0230817	0.139737	0.00202665	0.0932974
WBGene00004840	5.61122	0.0281949	0.141117	0.00205116	0.0939075
WBGene00016923	70.2553	1.66956	1.0537	0.00207257	0.0945453
WBGene00007985	588.324	0.821557	0.464565	0.00213686	0.0969353
WBGene00017808	10.423	-0.0348418	0.143288	0.00214031	0.0969353
WBGene00185118	63.6084	1.47797	0.917493	0.00215168	0.0971025
WBGene00014468	12.7728	2.64674	1.75155	0.0021868	0.098336
WBGene00000672	33.5826	-0.0290728	0.141385	0.00219709	0.0984486
WBGene00000707	67.38	-0.0132316	0.137866	0.00220677	0.0985327
WBGene00019978	221.739	1.32065	0.833855	0.0022252	0.0990059
WBGene00015907	79.5558	-0.0210439	0.139283	0.00224553	0.0995596
WBGene00012431	200.418	0.921233	0.547641	0.00225344	0.099561
WBGene00016258	923.096	0.818327	0.471462	0.00231372	0.101868
WBGene00001971	17131.7	-1.12276	0.712156	0.00233457	0.102075
WBGene00013007	32.0969	-1.114	0.680616	0.0023267	0.102075
WBGene00004166	4538.67	-0.0989725	0.193783	0.00237078	0.1033
WBGene00001699	31.2909	-0.0465173	0.148419	0.00241963	0.105067
WBGene00004997	30.8172	-0.0715062	0.16496	0.00243484	0.105365
WBGene00010265	9.77892	-0.0367284	0.144073	0.00250321	0.107954
WBGene00000740	203.012	-0.0205232	0.139165	0.00255694	0.109698
WBGene00007778	14.4758	-0.0280444	0.141052	0.0025697	0.109698
WBGene00000616	104.07	-0.0128961	0.137817	0.00256349	0.109698
WBGene00045114	16.5036	0.0249825	0.140232	0.00257853	0.109705
WBGene00003426	9.21994	-0.0234237	0.13978	0.00263164	0.111421
WBGene00007752	124.113	0.868622	0.536162	0.00265388	0.111421
WBGene00011911	10.4244	-0.0285556	0.141207	0.00266296	0.111421
WBGene00014000	111.668	-0.122555	0.229961	0.00264423	0.111421
WBGene00004264	37.9475	-0.0313434	0.142096	0.00265714	0.111421
WBGene00021105	10.6323	1.80159	1.45645	0.00273509	0.114061
WBGene00008597	6.35883	0.0381879	0.144562	0.00275177	0.114305
WBGene00009634	248.198	1.41364	1.01696	0.00275903	0.114305
WBGene00000212	34.3151	1.65664	1.26897	0.00279757	0.114448
WBGene00008903	44.4207	0.0310235	0.142001	0.0027987	0.114448
WBGene00022705	15.4779	-0.034215	0.14309	0.00279558	0.114448
WBGene00013723	25.1909	-0.0370533	0.144146	0.00279164	0.114448
WBGene00000597	5135.74	-1.00406	0.682758	0.00282503	0.115152
WBGene00000722	167.83	-0.0199758	0.139045	0.0028356	0.115211
WBGene00010407	123.459	0.93924	0.638893	0.00289382	0.116971
WBGene00017678	189.113	1.45418	1.10074	0.00289744	0.116971
WBGene00006648	694.147	-0.133653	0.252103	0.00293765	0.118217
WBGene00007460	21.242	1.48307	1.27766	0.00297673	0.119409
WBGene00220203	24.0088	0.033971	0.14302	0.00300211	0.120046
WBGene00000063	9537.71	-0.977429	0.692937	0.00306438	0.121005
WBGene00003473	236.812	1.30317	0.985775	0.00306318	0.121005
WBGene00044175	39.7098	1.52597	1.18958	0.00305439	0.121005
WBGene00012977	138.192	0.692211	0.429093	0.00304297	0.121005
WBGene00003431	51.7305	-0.0187298	0.138785	0.00308179	0.121313
WBGene00000711	47.7079	-0.0100338	0.137467	0.00309857	0.121508
WBGene00045458	11.3752	2.11435	1.74879	0.00310598	0.121508
WBGene00195185	102.264	1.38296	1.11074	0.0031569	0.123119
WBGene00016669	16.6905	1.8542	1.56235	0.00318784	0.123207
WBGene00017089	19.735	-0.0854013	0.177499	0.00318329	0.123207
WBGene00195017	10.4553	0.0233958	0.139794	0.00318841	0.123207
WBGene00000611	18.7653	-0.0716931	0.164875	0.00321892	0.124007
WBGene00219566	12.7065	2.03824	1.68218	0.00332715	0.127787
WBGene00002263	2742.61	1.26166	1.02494	0.00335348	0.128408
WBGene00010470	86.2648	1.22059	1.03714	0.00339485	0.128821
WBGene00045133	17.1902	0.032528	0.142501	0.00338676	0.128821
WBGene00000013	17.5079	0.0568247	0.154069	0.00338545	0.128821
WBGene00020350	14.491	-0.0239405	0.139942	0.0034262	0.129621
WBGene00004397	6.43288	-0.0197773	0.138977	0.00344436	0.129919
WBGene00022390	226.629	-0.834784	0.596771	0.00349045	0.131266
WBGene00045457	14.1386	1.94908	2.9236	0.00352839	0.132299
WBGene00023477	68.4442	1.4678	1.39675	0.00354047	0.132359
WBGene00004839	7.96631	0.0347786	0.143271	0.00355269	0.132424
WBGene00005522	100.332	0.0227209	0.139642	0.0036929	0.13565
WBGene00194784	17.372	0.0342707	0.14309	0.00368002	0.13565
WBGene00001074	69.4323	-0.0125329	0.137765	0.00367314	0.13565
WBGene00004300	106.3	-0.0192457	0.138886	0.00366281	0.13565
WBGene00012582	28.5019	1.29167	1.21272	0.00368986	0.13565
WBGene00044891	294.847	-0.601699	0.381135	0.00371784	0.13617
WBGene00008357	41.9452	1.5512	2.09896	0.00383236	0.137573
WBGene00043980	8.49289	1.66754	1.76459	0.00382342	0.137573
WBGene00000252	6.72958	-0.0193262	0.138882	0.00378429	0.137573
WBGene00004436	51391.4	-0.132148	0.247124	0.00377132	0.137573
WBGene00008541	22.9672	-0.0441324	0.147183	0.00382929	0.137573
WBGene00010804	47.7165	0.0197689	0.138985	0.00381603	0.137573
WBGene00044242	6.01477	0.0308047	0.141898	0.00379977	0.137573
WBGene00021035	24380.1	-0.0888653	0.180937	0.00386237	0.137867
WBGene00012968	207.477	0.937572	0.749354	0.00385268	0.137867
WBGene00006053	137.448	-0.0118679	0.137678	0.00387489	0.137924
WBGene00019473	34.9458	1.29046	1.36613	0.00391624	0.138074
WBGene00018724	235.982	1.14601	1.06812	0.00395001	0.138074
WBGene00001937	72.8163	0.753676	0.551628	0.00395559	0.138074
WBGene00219399	4.76146	1.99185	2.03929	0.00389115	0.138074
WBGene00012223	6.60056	-0.0173711	0.138509	0.00394529	0.138074
WBGene00001941	437.094	0.703403	0.494534	0.00393665	0.138074
WBGene00018989	160.22	0.0483561	0.149264	0.0039176	0.138074
WBGene00000175	547.786	-0.129619	0.240235	0.00397878	0.138501
WBGene00015216	50.424	1.07139	1.03686	0.00401002	0.138948
WBGene00000639	6.34872	-0.0193643	0.138887	0.00401361	0.138948
WBGene00045400	19.5458	1.2056	1.27179	0.00403896	0.139443
WBGene00010655	10.0581	1.63218	1.47337	0.0040825	0.140563
WBGene00019406	18.2033	-0.028139	0.141052	0.00412955	0.141796
WBGene00044457	19.22	1.49886	1.99747	0.0041992	0.143797
WBGene00001716	6.96195	-0.0189253	0.1388	0.00422672	0.144348
WBGene00014252	757.234	0.774092	0.600654	0.0042477	0.144674
WBGene00001067	54.0208	-0.0111204	0.137588	0.00428533	0.145522
WBGene00007156	7.77646	-0.0215551	0.139368	0.00429565	0.145522
WBGene00010928	3.21347	0.024406	0.140035	0.00431825	0.145897
WBGene00016161	49.7848	-0.0135912	0.137908	0.00433181	0.145965
WBGene00009110	44.2618	0.0522388	0.151277	0.00437619	0.146694
WBGene00000989	131.245	-1.48936	0.991953	0.00437668	0.146694
WBGene00020391	781.78	-0.698822	0.547419	0.00444094	0.147673
WBGene00016327	25.2564	-0.0275191	0.140878	0.00443963	0.147673
WBGene00000202	117.659	0.753617	0.636623	0.00442366	0.147673
WBGene00045411	7.88429	0.0258665	0.140438	0.00450729	0.149486
WBGene00044763	4.47949	-0.0225887	0.139576	0.00454844	0.150456
WBGene00198777	7.7412	0.0433045	0.146721	0.00457447	0.150529
WBGene00004415	44224.8	-0.774972	0.691934	0.00457073	0.150529
WBGene00008379	179.364	0.675828	0.530685	0.00459317	0.150751
WBGene00000741	97.2653	-0.0120743	0.137704	0.00462551	0.151173
WBGene00017114	9.89236	-0.0190491	0.138801	0.00462995	0.151173
WBGene00000981	35.5432	-0.0598498	0.155769	0.0046542	0.151278
WBGene00014955	342.187	0.937576	0.930746	0.0046571	0.151278
WBGene00015689	8.54562	-0.0209653	0.139209	0.00470356	0.152395
WBGene00000609	10177.8	-0.118336	0.220155	0.00472576	0.15246
WBGene00007919	40.4761	0.0534426	0.151945	0.00474176	0.15246
WBGene00009377	51.5645	-0.0177259	0.138581	0.00473297	0.15246
WBGene00012781	42.2401	-0.0507769	0.150421	0.00477279	0.153068
WBGene00194695	4.93723	0.0224016	0.139505	0.00480321	0.153292
WBGene00001692	309.919	-0.1481	0.283129	0.00480403	0.153292
WBGene00044280	30.3005	0.0573451	0.154226	0.00483879	0.153761
WBGene00008063	73.2836	-0.0138373	0.137941	0.00484307	0.153761
WBGene00012600	202.79	0.972447	1.53525	0.00489618	0.155058
WBGene00001423	9859.1	-0.689749	0.597133	0.00491065	0.155127
WBGene00009973	391.558	-0.641691	0.545648	0.00511826	0.161283
WBGene00018314	11.1953	-0.0316466	0.142187	0.00515834	0.161739
WBGene00019913	4.24571	-0.0296187	0.141389	0.00515335	0.161739
WBGene00006861	350.138	-0.123592	0.228995	0.00517446	0.161777
WBGene00023490	10.5728	-0.0283855	0.141075	0.00518517	0.161777
WBGene00003637	104.516	0.771881	0.875963	0.00528815	0.16418
WBGene00189950	4.61252	0.0243988	0.140039	0.00528818	0.16418
WBGene00015756	74.3091	0.808186	3.51954	0.00532159	0.164429
WBGene00195146	9.22188	0.04559	0.147694	0.00532221	0.164429
WBGene00014454	20973.5	0.0722805	0.164987	0.00537851	0.165763
WBGene00006787	181.196	-0.108723	0.20483	0.00544312	0.166536
WBGene00009459	9.29042	-0.027539	0.140904	0.00543889	0.166536
WBGene00045399	1074.22	-0.175212	0.368078	0.00543989	0.166536
WBGene00010241	5.3061	-0.0178449	0.138585	0.00550868	0.168135
WBGene00004391	2226.37	-0.56378	0.452362	0.00558609	0.170086
WBGene00009031	15.4416	-0.0277645	0.140907	0.00566329	0.172022
WBGene00015947	60.5956	0.0762847	0.168161	0.00571443	0.172745
WBGene00007248	6.20289	-0.0249313	0.140076	0.00570759	0.172745
WBGene00008743	36.5038	0.0381815	0.144516	0.00574703	0.172903
WBGene00004428	26897.8	-0.607813	0.559866	0.00574372	0.172903
WBGene00008590	22.0384	-0.0355395	0.143443	0.00581568	0.17291
WBGene00015046	229.184	0.0565173	0.153731	0.00578277	0.17291
WBGene00011124	167.025	0.667089	0.722088	0.00579335	0.17291
WBGene00018594	11.1997	0.0642424	0.158535	0.00581557	0.17291
WBGene00219709	9.03335	0.028071	0.14102	0.00578975	0.17291
WBGene00077437	125.681	0.0711785	0.163953	0.00594474	0.176333
WBGene00077728	100.159	0.0628217	0.157786	0.00598531	0.17712
WBGene00004346	24.9786	0.0307541	0.141827	0.00603773	0.178254
WBGene00044206	97.9599	0.023362	0.139778	0.00608817	0.179324
WBGene00011011	526.859	-0.569133	0.525232	0.0061671	0.181227
WBGene00018356	10.3112	0.0511494	0.150419	0.00622961	0.182639
WBGene00000214	11630.3	0.662111	0.818029	0.00624505	0.182668
WBGene00022708	13.9364	-0.0285754	0.141174	0.00631207	0.184202
WBGene00019204	28.0854	0.0642448	0.158659	0.00634174	0.184217
WBGene00015094	17.3694	-0.0349638	0.143214	0.0063287	0.184217
WBGene00014450	7.28733	0.0200789	0.139017	0.00641464	0.185907
WBGene00013219	1898.62	-0.525682	0.45447	0.00646844	0.187037
WBGene00206459	105.214	0.0401289	0.145274	0.00651604	0.187983
WBGene00003947	8191.79	-0.12743	0.233821	0.00653823	0.188194
WBGene00007507	92.7967	0.130899	0.240176	0.00662004	0.189684
WBGene00015455	18.533	0.051085	0.15041	0.00660905	0.189684
WBGene00004512	57.412	0.034405	0.143055	0.0066857	0.191132
WBGene00007541	9.19513	-0.0189772	0.13881	0.0067296	0.191521
WBGene00009308	23.3156	-0.0478978	0.148799	0.00672783	0.191521
WBGene00019899	12.3435	0.0555358	0.152925	0.00682735	0.193602
WBGene00015230	9.81499	0.0423408	0.146243	0.00683338	0.193602
WBGene00021398	37.562	-0.00864035	0.13732	0.00692098	0.195646
WBGene00045388	33.5815	0.0510244	0.150423	0.00695083	0.196051
WBGene00017698	14.643	0.0654515	0.159256	0.0069685	0.196111
WBGene00013489	2164.96	-0.102518	0.195737	0.00700709	0.196759
WBGene00003449	55.369	-0.00728114	0.137207	0.00705295	0.197608
WBGene00000713	16741.8	-0.5473	1.04696	0.00714931	0.199423
WBGene00019220	723.196	-0.519516	0.512593	0.00714185	0.199423
WBGene00044109	4.24812	-0.0199705	0.138976	0.00717259	0.199632
WBGene00015305	4.70894	-0.017659	0.13854	0.00720443	0.199638
WBGene00023180	6.82598	0.0305511	0.141736	0.00720389	0.199638
WBGene00016796	639.329	-0.531042	0.57581	0.00728164	0.201336
WBGene00044921	129.562	0.0761035	0.16777	0.00738829	0.203395
WBGene00001933	255.53	0.513997	0.469266	0.00738347	0.203395
WBGene00013078	120.767	0.14595	0.270376	0.00745975	0.203879
WBGene00195233	89.2177	0.0940623	0.185447	0.00745491	0.203879
WBGene00195245	7.89979	0.0230647	0.139683	0.00747038	0.203879
WBGene00001247	5.29756	0.0281882	0.140972	0.00746888	0.203879
WBGene00020509	131.222	0.122567	0.22447	0.00751443	0.204639
WBGene00009846	5.98547	-0.0256828	0.140312	0.0075785	0.20594
WBGene00016094	8.86887	0.0527329	0.151289	0.00759859	0.206043
WBGene00010035	26.5573	-0.0537109	0.151855	0.0076622	0.207322
WBGene00001444	83.9098	0.0919736	0.182941	0.0076841	0.207471
WBGene00000883	30115.9	-0.13665	0.250154	0.00775386	0.208712
WBGene00017488	37.3785	0.043593	0.146687	0.00776311	0.208712
WBGene00019977	17.2135	0.0712045	0.163506	0.00782664	0.208946
WBGene00010126	4.09312	0.0147462	0.138059	0.00783795	0.208946
WBGene00018755	30.3244	0.0521599	0.150981	0.00782547	0.208946
WBGene00006509	4.5314	-0.0175526	0.138519	0.0078312	0.208946
WBGene00003446	43.2221	-0.0104288	0.137501	0.0079001	0.209297
WBGene00006051	88.3954	-0.0216361	0.139341	0.0079008	0.209297
WBGene00008856	490.452	-0.11346	0.210265	0.00788966	0.209297
WBGene00008519	8.27705	-0.0487423	0.149273	0.00793732	0.209615
WBGene00016319	33.8049	0.0505293	0.150103	0.00794598	0.209615
WBGene00019805	314.007	0.104711	0.198136	0.00796821	0.209763
WBGene00003464	19.0572	-0.0284411	0.141066	0.00798636	0.209804
WBGene00000535	592.073	-0.471234	0.435443	0.00807483	0.210324
WBGene00020981	22.7958	0.0544773	0.15227	0.00808299	0.210324
WBGene00022775	623.232	-0.234956	0.74534	0.00805164	0.210324
WBGene00255375	14.9514	-0.0311854	0.141898	0.0080894	0.210324
WBGene00008295	11.248	0.0261095	0.140459	0.00802483	0.210324
WBGene00012527	566.781	0.476658	1.3301	0.00814944	0.210646
WBGene00012357	15.1435	-0.0274777	0.140784	0.00815179	0.210646
WBGene00014466	3.79299	0.027149	0.140732	0.00813191	0.210646
WBGene00018250	43.2677	-0.0618132	0.156752	0.00822551	0.212117
WBGene00019563	25.1966	0.054487	0.152331	0.00826036	0.212582
WBGene00001855	8464.89	-0.47954	0.734975	0.0083147	0.213546
WBGene00019236	13.076	-0.0468355	0.148166	0.00842294	0.215015
WBGene00000197	1608.26	-0.119161	0.218124	0.00839385	0.215015
WBGene00016462	5.45117	-0.0232987	0.139723	0.00841458	0.215015
WBGene00000219	4611.72	0.090903	0.181747	0.00848104	0.216061
WBGene00003706	9.88873	0.053819	0.151765	0.00856933	0.217871
WBGene00010202	5.7132	0.0363798	0.143658	0.0087515	0.221428
WBGene00235332	4.5512	-0.0319365	0.142107	0.00876178	0.221428
WBGene00000754	12494.3	-0.238924	0.734129	0.00873349	0.221428
WBGene00008359	57.3601	0.0506309	0.150162	0.00887775	0.223911
WBGene00020223	7.90887	-0.0180186	0.13857	0.00890146	0.224062
WBGene00020064	373.132	0.466848	0.643053	0.00895791	0.225034
WBGene00021239	142.449	0.274855	1.36613	0.00898565	0.225283
WBGene00269337	4.12851	-0.0174885	0.138499	0.00907539	0.227083
WBGene00004990	5589	0.125823	0.229016	0.00910907	0.227475
WBGene00018153	27.8572	0.0563586	0.153314	0.00914032	0.227805
WBGene00008244	80.4335	0.0388423	0.144695	0.00922752	0.228623
WBGene00000991	185.563	-0.118	0.215811	0.00924383	0.228623
WBGene00019683	18.5607	-0.0416652	0.145762	0.00926363	0.228623
WBGene00021690	18.4065	-0.0102236	0.13748	0.00924918	0.228623
WBGene00015106	6.07802	-0.021543	0.139282	0.00920822	0.228623
WBGene00219735	3.42216	0.0197472	0.138938	0.00930429	0.229179
WBGene00022297	365.927	-0.419063	0.386318	0.00936674	0.230269
WBGene00004754	734.123	-0.20927	0.497223	0.00940061	0.230614
WBGene00008854	3.49874	-0.0246255	0.13997	0.00941729	0.230614
WBGene00000684	7.54699	-0.02084	0.139132	0.00965483	0.235974
WBGene00002078	1532.66	-0.0996746	0.191448	0.00971653	0.236112
WBGene00007130	20.2019	-0.061674	0.156415	0.00969769	0.236112
WBGene00015680	71.5464	0.08338	0.173731	0.00971416	0.236112
WBGene00001157	93.1925	-0.078009	0.168832	0.0097587	0.236681
WBGene00001395	369.325	0.0774712	0.168585	0.00984234	0.237575
WBGene00017384	19.3073	-0.0246682	0.140032	0.00981437	0.237575
WBGene00001996	900.784	-0.385276	0.314598	0.0098537	0.237575
WBGene00004472	65504.3	-0.123677	0.224435	0.00987078	0.237575
WBGene00000993	162.465	-0.228391	0.590974	0.00991401	0.238162
WBGene00019061	3022.48	-0.416369	0.59934	0.0099441	0.238432
WBGene00000683	28.1177	-0.0132439	0.137843	0.00998658	0.238997
WBGene00000377	3170.29	-0.223626	0.554383	0.0100718	0.240581
WBGene00219707	88.3944	0.0512883	0.150451	0.0101536	0.240789
WBGene00004408	29409.3	-0.209523	0.475499	0.0101561	0.240789
WBGene00007603	588.767	0.216634	0.51591	0.0101567	0.240789
WBGene00045149	3.91379	0.0178251	0.138561	0.0101209	0.240789
WBGene00012482	3.88813	-0.0242684	0.13988	0.0102738	0.243108
WBGene00010719	8.38907	-0.0252678	0.140226	0.0103668	0.244047
WBGene00007301	12.8391	-0.0239445	0.139853	0.0103714	0.244047
WBGene00044646	8.70872	0.0307369	0.141744	0.010335	0.244047
WBGene00004094	1282.68	-0.398395	0.556111	0.0105974	0.248902
WBGene00044338	23.1908	0.0392889	0.144813	0.0107376	0.25054
WBGene00003958	49.5056	0.100965	0.191987	0.010729	0.25054
WBGene00006315	58.5908	0.0400041	0.14502	0.0107465	0.25054
WBGene00020778	68.4995	-0.0960306	0.186662	0.0107289	0.25054
WBGene00007613	3.94699	-0.016849	0.138381	0.0108081	0.251512
WBGene00007765	582.563	0.0718019	0.163816	0.0108284	0.251521
WBGene00045367	10.8955	0.0324443	0.14228	0.0108711	0.251561
WBGene00284851	25.0795	0.052495	0.150983	0.0108898	0.251561
WBGene00013713	24.4468	-0.0131243	0.137835	0.0108732	0.251561
WBGene00023153	165.049	0.0195751	0.138907	0.0109747	0.252912
WBGene00045091	32.641	0.0360436	0.14341	0.0109883	0.252912
WBGene00009143	5.15169	-0.0238766	0.139782	0.011043	0.253707
WBGene00013937	4.50942	0.0202437	0.138985	0.0111115	0.253899
WBGene00017335	13.1317	-0.0413294	0.145602	0.0110733	0.253899
WBGene00021835	107.445	-0.114815	0.209949	0.0111317	0.253899
WBGene00044762	579.117	0.176789	0.342839	0.0111147	0.253899
WBGene00022064	4.45912	-0.0161613	0.138268	0.011163	0.254153
WBGene00219800	41800	0.048907	0.149185	0.0111954	0.254433
WBGene00012970	11.9145	-0.0475113	0.148362	0.0112505	0.255226
WBGene00020760	75.4706	0.0468977	0.148156	0.0113971	0.258089
WBGene00003994	1912.68	-0.171556	0.325577	0.011461	0.259071
WBGene00006764	3381.56	-0.0874561	0.177368	0.0115568	0.260097
WBGene00016583	419.855	-0.120994	0.219377	0.0115681	0.260097
WBGene00004433	63831.8	-0.141089	0.253759	0.0115272	0.260097
WBGene00011493	5.2936	-0.0212366	0.139159	0.0116147	0.260595
WBGene00010541	78.057	0.104001	0.195461	0.0116315	0.260595
WBGene00015043	66.1057	0.0858325	0.175683	0.0116602	0.260659
WBGene00001455	45.6176	0.100813	0.191667	0.0116766	0.260659
WBGene00194687	23.0182	0.0479607	0.148633	0.0116962	0.260659
WBGene00000533	172.186	0.114811	0.20996	0.0118719	0.26238
WBGene00008388	73.0184	0.0947045	0.184788	0.0119188	0.26238
WBGene00000245	102.234	-0.15444	0.281626	0.0118024	0.26238
WBGene00011748	4.47618	-0.0150602	0.138094	0.0118643	0.26238
WBGene00023083	16.059	0.0227695	0.139588	0.0118801	0.26238
WBGene00022140	16.3782	-0.049867	0.149645	0.0119056	0.26238
WBGene00014472	16718	0.0327934	0.142426	0.0118442	0.26238
WBGene00023498	124.631	0.354439	0.591868	0.0120659	0.264696
WBGene00007190	12.8042	-0.0254406	0.140193	0.0120546	0.264696
WBGene00010633	238.035	-0.0149043	0.138078	0.0121534	0.26608
WBGene00018073	54.1665	-0.120996	0.217968	0.0121711	0.26608
WBGene00013569	55.8397	0.16441	0.303517	0.0122466	0.266905
WBGene00018942	3.31982	0.0257905	0.140301	0.0122699	0.266905
WBGene00000230	4095.15	-0.173471	0.327554	0.0122722	0.266905
WBGene00017501	247.044	0.0855147	0.175416	0.0123468	0.268065
WBGene00008791	7.1917	0.032209	0.14218	0.0124749	0.270379
WBGene00007599	43.5576	0.0643711	0.158182	0.0124961	0.270379
WBGene00009028	38.9559	-0.0169397	0.138403	0.0125939	0.272029
WBGene00023467	290.536	0.0235705	0.139774	0.0126363	0.272479
WBGene00007129	297.119	-0.355916	0.408037	0.0128407	0.275475
WBGene00219571	39.0214	0.070857	0.162718	0.0128062	0.275475
WBGene00009126	2137.31	-0.330221	0.591746	0.0128405	0.275475
WBGene00015638	230.714	0.137564	0.245697	0.012952	0.276983
WBGene00010960	15277.2	0.112567	0.206328	0.0129548	0.276983
WBGene00015171	132.214	0.0663846	0.159497	0.0130445	0.27843
WBGene00044674	10.3584	-0.0174744	0.138472	0.0131382	0.279957
WBGene00017258	128.02	0.0763322	0.167061	0.0133844	0.281406
WBGene00012638	4.33991	-0.0147946	0.13805	0.0133813	0.281406
WBGene00017578	28.449	0.0501046	0.149596	0.0133043	0.281406
WBGene00219456	6.14122	0.0238244	0.139804	0.0133189	0.281406
WBGene00045095	5.39073	0.0239066	0.13984	0.0133698	0.281406
WBGene00011957	9.24238	0.0327425	0.142324	0.0133171	0.281406
WBGene00015104	455.554	0.302407	0.617685	0.0133817	0.281406
WBGene00016981	552.079	-0.110122	0.20289	0.0132395	0.281406
WBGene00012827	5.90265	-0.0186256	0.138642	0.0137591	0.287627
WBGene00010113	1960	-0.0820157	0.171878	0.0137713	0.287627
WBGene00020840	52.503	-0.0172315	0.138449	0.013737	0.287627
WBGene00194738	10.9019	0.0355069	0.143286	0.0137595	0.287627
WBGene00000720	39.138	-0.0148922	0.138071	0.0139297	0.2895
WBGene00009605	5.4872	-0.0180943	0.138605	0.0139226	0.2895
WBGene00009983	22.2059	-0.0238031	0.139785	0.0139126	0.2895
WBGene00016174	21.7569	0.05022	0.149636	0.013987	0.290214
WBGene00000748	27.4077	-0.013455	0.137872	0.014082	0.291705
WBGene00043062	56.8677	0.0749247	0.16574	0.0142724	0.295165
WBGene00018046	724.646	0.121399	0.216849	0.0142959	0.295169
WBGene00006050	139.109	-0.0413527	0.145535	0.014347	0.29574
WBGene00044182	16.1467	0.0337672	0.142745	0.0144345	0.297059
WBGene00008125	6.91972	-0.0160953	0.138215	0.0145111	0.297657
WBGene00012985	15.6242	0.0663909	0.159235	0.0145578	0.297657
WBGene00016772	8.82867	0.0151057	0.138097	0.0145479	0.297657
WBGene00007045	433.589	-0.18696	0.356662	0.0145481	0.297657
WBGene00019785	6.41217	-0.0242636	0.139866	0.0146137	0.298319
WBGene00019780	189.791	0.125863	0.224375	0.0146541	0.29866
WBGene00003766	1562.42	0.0883836	0.177795	0.0147645	0.300426
WBGene00020216	580.779	-0.304975	0.502063	0.0147967	0.300596
WBGene00001000	388.543	-0.0698932	0.161912	0.0149373	0.302966
WBGene00001480	87.5806	0.063993	0.15769	0.0150317	0.304391
WBGene00019722	10.7452	0.0189197	0.138737	0.0151727	0.306033
WBGene00001767	39.0121	0.0175845	0.138502	0.01515	0.306033
WBGene00194700	6.14238	-0.0177755	0.138512	0.0151854	0.306033
WBGene00011466	3.50007	-0.0160605	0.138236	0.0152629	0.307095
WBGene00013181	163.393	0.138047	0.243994	0.0152867	0.307095
WBGene00019808	421.167	0.169325	0.308723	0.0153156	0.307186
WBGene00009773	15.8618	0.0219785	0.139337	0.0153413	0.307215
WBGene00004420	45423.3	-0.113577	0.206167	0.0155497	0.310896
WBGene00001671	12.494	0.0360656	0.143453	0.0156227	0.311861
WBGene00006587	1662.41	-0.0738314	0.16473	0.0160811	0.316665
WBGene00006952	4.99202	-0.0246419	0.139909	0.0160527	0.316665
WBGene00009640	263.848	0.0464927	0.1478	0.0162141	0.316665
WBGene00010940	21.035	0.0615465	0.156022	0.0161996	0.316665
WBGene00000675	6236.36	-0.0943308	0.183297	0.0161346	0.316665
WBGene00006052	34.125	-0.00913582	0.137362	0.0161897	0.316665
WBGene00007384	41.0269	-0.0759041	0.166472	0.0160437	0.316665
WBGene00012014	93.0979	0.102315	0.191946	0.0160042	0.316665
WBGene00013375	56.5738	0.0581958	0.154033	0.0161167	0.316665
WBGene00016083	4.59784	-0.0256693	0.140147	0.0161591	0.316665
WBGene00006651	9.29078	-0.0332189	0.142419	0.0159146	0.316665
WBGene00009656	52.5234	-0.064844	0.158149	0.0162068	0.316665
WBGene00009754	3.47253	-0.0167564	0.138345	0.0161566	0.316665
WBGene00021471	3.36006	-0.0173986	0.138455	0.0159498	0.316665
WBGene00020401	19.6628	-0.0538227	0.15143	0.0164665	0.321097
WBGene00012738	1652.82	-0.0792297	0.169271	0.0164971	0.321198
WBGene00017998	35.0238	-0.012296	0.137714	0.0165574	0.321623
WBGene00000378	3747.43	-0.10042	0.189769	0.0165698	0.321623
WBGene00004991	5.11783	0.0247789	0.140024	0.016614	0.321986
WBGene00002184	49.5032	0.0822506	0.171509	0.0168081	0.325248
WBGene00015044	26.9478	0.0483793	0.14857	0.0169069	0.326661
WBGene00003964	2299	-0.288064	0.421192	0.0170036	0.327526
WBGene00020987	7.74307	-0.0261986	0.140364	0.0169795	0.327526
WBGene00000475	4469.11	-0.297936	0.461501	0.0171514	0.32987
WBGene00014247	10.0887	-0.0265201	0.140447	0.0173915	0.333939
WBGene00271817	42.2408	0.0576993	0.153649	0.0174158	0.333939
WBGene00021709	42.4738	0.0615931	0.155964	0.0174758	0.334582
WBGene00003795	6262.22	-0.13645	0.238789	0.0175315	0.33514
WBGene00009218	31.1904	-0.0434336	0.14643	0.017688	0.335994
WBGene00018334	27.6712	0.0655608	0.158397	0.0176403	0.335994
WBGene00018772	22.3946	0.0667483	0.159288	0.0177091	0.335994
WBGene00023020	115.063	0.052053	0.150508	0.0176297	0.335994
WBGene00220074	3.24327	0.0146201	0.138014	0.0176681	0.335994
WBGene00007630	2583.36	-0.141952	0.247772	0.0177575	0.336408
WBGene00016335	22.5871	0.0536913	0.151282	0.0178478	0.337107
WBGene00010650	5.33902	-0.0179721	0.138532	0.0178403	0.337107
WBGene00044210	48.0783	-0.0900943	0.17863	0.0179085	0.33754
WBGene00077783	30.72	0.0364101	0.143561	0.0179241	0.33754
WBGene00021238	41.1266	0.0776854	0.167608	0.0179723	0.337944
WBGene00044547	4.25324	0.0237269	0.139754	0.0180105	0.338158
WBGene00255704	14.1692	0.0384619	0.144289	0.0180399	0.338209
WBGene00021078	323.83	-0.246794	0.436083	0.018134	0.339469
WBGene00015042	4.48633	0.0254021	0.14017	0.0183797	0.342893
WBGene00219979	207.905	0.0544343	0.151748	0.0184156	0.342893
WBGene00219908	430.72	-0.157148	0.277559	0.0184003	0.342893
WBGene00010246	4.37852	-0.0205963	0.139011	0.0184255	0.342893
WBGene00000165	956.683	0.148842	0.259457	0.0184541	0.342921
WBGene00004429	37769.4	-0.134327	0.234312	0.0186054	0.345224
WBGene00008040	122.524	0.103211	0.192254	0.0186419	0.345394
WBGene00195043	9.63632	0.0445484	0.146751	0.0186971	0.345911
WBGene00011004	6.36434	0.0373192	0.14382	0.0187933	0.347182
WBGene00010238	62.1897	0.0623283	0.156328	0.0188397	0.34753
WBGene00011129	4.52784	0.0312328	0.141735	0.0190011	0.349487
WBGene00017991	14.3146	-0.0343305	0.142815	0.0189832	0.349487
WBGene00010514	40.8326	0.0732237	0.163923	0.0190963	0.350628
WBGene00010734	207.918	0.105872	0.195282	0.0191186	0.350628
WBGene00009688	14909.1	-0.092379	0.180648	0.0191813	0.35076
WBGene00006352	2308.84	0.254801	0.425425	0.0191768	0.35076
WBGene00008741	1026.49	0.143463	0.248547	0.0192542	0.351584
WBGene00022679	10.6573	-0.0252294	0.140082	0.0194011	0.353245
WBGene00219329	29.4492	0.0528961	0.150886	0.0193785	0.353245
WBGene00012538	111.766	0.0916027	0.179672	0.0196345	0.356468
WBGene00000779	1609.74	-0.105488	0.194599	0.0196289	0.356468
WBGene00045157	88.9548	0.0246947	0.140011	0.0197202	0.356799
WBGene00194992	5.64747	0.0216057	0.139214	0.0197374	0.356799
WBGene00014470	15.8694	0.00767013	0.137229	0.0197007	0.356799
WBGene00002125	516.921	-0.175661	0.308574	0.0198438	0.357797
WBGene00009664	560.121	-0.196351	0.348798	0.0198493	0.357797
WBGene00020413	12.411	-0.029094	0.141052	0.0198888	0.357998
WBGene00013506	24.7024	0.0619761	0.155994	0.0199863	0.358731
WBGene00021857	5470.23	-0.127556	0.223119	0.0199856	0.358731
WBGene00003096	361.656	0.0578026	0.153594	0.0200653	0.359088
WBGene00008607	249.101	0.097373	0.185598	0.0200965	0.359088
WBGene00020713	86.8077	-0.0135486	0.137864	0.0201199	0.359088
WBGene00021799	20.691	0.0645546	0.157599	0.0200646	0.359088
WBGene00003721	9.78913	0.0324115	0.142081	0.0201805	0.359458
WBGene00022336	13076.7	-0.272685	0.331747	0.0201975	0.359458
WBGene00018729	183.657	0.0587237	0.154127	0.0202357	0.359632
WBGene00019430	23.7493	-0.030066	0.141412	0.0202697	0.35973
WBGene00008356	298.148	0.0721774	0.163088	0.020568	0.363683
WBGene00000680	6046.46	-0.148762	0.255783	0.0205476	0.363683
WBGene00009685	4.82203	-0.0194042	0.138817	0.0205788	0.363683
WBGene00014173	49.1317	0.0569937	0.153049	0.02078	0.366726
WBGene00003154	2074.05	-0.076323	0.166261	0.0208261	0.366726
WBGene00009824	35.4333	0.0528032	0.150742	0.0208381	0.366726
WBGene00005903	4.04737	0.0185947	0.138673	0.0208688	0.366757
WBGene00014268	14.4769	0.0259523	0.140289	0.0209305	0.36733
WBGene00008960	4.75781	0.0328301	0.142209	0.0209853	0.367345
WBGene00015783	21.206	0.0533523	0.151001	0.0210144	0.367345
WBGene00008480	749.185	-0.268085	0.326422	0.0210185	0.367345
WBGene00019488	30.5897	0.0798347	0.16895	0.0210916	0.36774
WBGene00000799	42.6864	0.0756611	0.165548	0.0210994	0.36774
WBGene00000977	102.669	0.0938617	0.181668	0.0212681	0.36789
WBGene00015786	8.74924	0.0458988	0.147297	0.0211454	0.36789
WBGene00004993	238.332	0.0859896	0.174286	0.0212007	0.36789
WBGene00003438	48.3031	-0.0151267	0.138085	0.0212444	0.36789
WBGene00002112	8.22023	0.0306336	0.141588	0.0211955	0.36789
WBGene00010479	1084.49	-0.146867	0.251293	0.0212826	0.36789
WBGene00021635	45.3387	0.0515533	0.150106	0.021337	0.368326
WBGene00001703	43.3291	-0.0517819	0.150155	0.0213853	0.368655
WBGene00012277	1525.25	0.0858517	0.174245	0.021418	0.368716
WBGene00006063	23.2109	0.0672356	0.159232	0.0214849	0.369365
WBGene00044167	7.01998	0.0351232	0.142975	0.0215347	0.369719
WBGene00007606	520.32	-0.210719	0.345107	0.0216308	0.369781
WBGene00012831	52.7633	-0.0433867	0.146224	0.0217575	0.369781
WBGene00004473	8395.14	-0.164406	0.280405	0.0217725	0.369781
WBGene00010085	108.475	-0.110101	0.19972	0.0216579	0.369781
WBGene00015413	517.27	-0.120294	0.212167	0.02161	0.369781
WBGene00022047	103.968	0.0642121	0.157421	0.02175	0.369781
WBGene00045391	135.514	0.0184631	0.138648	0.021745	0.369781
WBGene00017128	292.52	0.114471	0.205031	0.0216184	0.369781
WBGene00000667	9.70507	-0.0172058	0.138399	0.0219108	0.371631
WBGene00045200	5.94558	0.0216698	0.139204	0.022026	0.372085
WBGene00000594	100.713	-0.0195083	0.138847	0.0220204	0.372085
WBGene00012990	782.241	0.0753681	0.165306	0.0219679	0.372085
WBGene00019084	8.29174	-0.0218237	0.139331	0.0221131	0.373059
WBGene00012564	57.711	0.072965	0.163311	0.0222686	0.373766
WBGene00016763	34.376	0.0796102	0.168559	0.0223029	0.373766
WBGene00003040	487.462	0.195098	0.331349	0.022287	0.373766
WBGene00010922	23.7682	0.0606689	0.154965	0.0222072	0.373766
WBGene00018561	7.625	-0.0302639	0.141375	0.0222457	0.373766
WBGene00006040	54.2882	-0.0135553	0.13786	0.0223464	0.373999
WBGene00016865	8.5963	0.0431034	0.145963	0.0224681	0.374053
WBGene00003129	303.152	-0.14184	0.24313	0.0224304	0.374053
WBGene00012180	6.76224	0.0308362	0.14162	0.0224607	0.374053
WBGene00012553	5810.76	-0.126891	0.220546	0.0224448	0.374053
WBGene00015805	26.712	0.0381973	0.144121	0.0227678	0.378545
WBGene00016058	38.1759	-0.0129058	0.137774	0.0228183	0.378886
WBGene00001150	3.91385	-0.0275452	0.140639	0.0231551	0.382968
WBGene00022754	133.541	-0.0157875	0.138184	0.0231366	0.382968
WBGene00044939	16.586	0.0253155	0.140146	0.0231423	0.382968
WBGene00022100	7.57335	0.0363618	0.143345	0.0232284	0.383678
WBGene00011774	55.9112	0.0842023	0.17227	0.0232851	0.384114
WBGene00008232	479.225	0.101415	0.1887	0.0235089	0.384212
WBGene00013567	2210.17	-0.13062	0.225293	0.0236255	0.384212
WBGene00269383	114.348	0.0828082	0.171109	0.0235622	0.384212
WBGene00004430	45775.5	-0.110469	0.199005	0.0236106	0.384212
WBGene00004432	48672.7	-0.0861208	0.173989	0.023588	0.384212
WBGene00009526	11.6249	0.038643	0.144171	0.0233244	0.384212
WBGene00019022	15.6674	-0.0521408	0.150193	0.0235777	0.384212
WBGene00007856	22.3459	0.0514293	0.149918	0.0234	0.384212
WBGene00012557	7463.28	0.105419	0.193537	0.0234729	0.384212
WBGene00012719	623.616	0.123365	0.21539	0.0236201	0.384212
WBGene00044943	28.4212	0.0299114	0.141356	0.0236151	0.384212
WBGene00000410	952.122	-0.0909908	0.178474	0.0236645	0.38435
WBGene00019799	545.55	-0.12125	0.213117	0.0237029	0.38448
WBGene00013692	34.1613	0.0808318	0.169262	0.023801	0.385099
WBGene00022751	103.9	-0.0098293	0.137422	0.0238749	0.385099
WBGene00020105	5.91299	-0.0216081	0.139263	0.0238305	0.385099
WBGene00021338	3.33742	0.0204962	0.139021	0.0238935	0.385099
WBGene00021702	165.554	0.106202	0.194109	0.0238828	0.385099
WBGene00006392	1192.57	-0.238652	0.332659	0.023926	0.385132
WBGene00016234	57.8552	-0.0921965	0.179233	0.0240397	0.38549
WBGene00001598	3500.76	-0.128053	0.221897	0.0240285	0.38549
WBGene00021334	250.071	0.12298	0.214451	0.0240389	0.38549
WBGene00016616	135.178	-0.0805774	0.169265	0.024109	0.386111
WBGene00007937	20.4987	0.0570555	0.15288	0.0241404	0.386125
WBGene00020496	1315.35	-0.130664	0.225817	0.0242164	0.38685
WBGene00044379	8.80982	0.0247482	0.139921	0.024265	0.387136
WBGene00012975	95.6494	0.0605438	0.154939	0.0243007	0.387217
WBGene00016877	48.7778	0.0446078	0.146693	0.0244032	0.388362
WBGene00012689	11.0607	-0.0238504	0.139763	0.0245019	0.389228
WBGene00001234	710.281	-0.212357	0.341941	0.0245193	0.389228
WBGene00022288	3.22457	-0.0146164	0.137992	0.0245622	0.38942
WBGene00015074	1128.58	0.107002	0.194894	0.0246851	0.39039
WBGene00022991	3.94378	0.0165293	0.138292	0.0246751	0.39039
WBGene00013083	45.5473	-0.0821806	0.17019	0.0247492	0.390719
WBGene00013463	4309.77	-0.203465	0.324389	0.0247678	0.390719
WBGene00018437	6.95462	-0.0276711	0.140636	0.0249252	0.392406
WBGene00014207	302.666	-0.0983149	0.185395	0.0249368	0.392406
WBGene00006584	333.814	-0.0501423	0.149368	0.0250127	0.39311
WBGene00022894	3.878	0.0186505	0.138631	0.0250454	0.393136
WBGene00006434	6210.07	-0.173708	0.28703	0.025144	0.393704
WBGene00269421	32.9093	0.042576	0.145791	0.0251255	0.393704
WBGene00020025	483.892	0.19293	0.315219	0.0251855	0.393866
WBGene00003495	495.025	-0.0864098	0.17407	0.0252861	0.39495
WBGene00003224	34.5998	0.0567315	0.152615	0.0253536	0.395377
WBGene00000251	27.6575	-0.00990759	0.137431	0.0254315	0.395377
WBGene00009165	127.408	-0.105271	0.19223	0.0254251	0.395377
WBGene00044796	12.6552	0.0241265	0.139802	0.0254386	0.395377
WBGene00014001	270.374	0.0954662	0.182412	0.0256495	0.397125
WBGene00008448	23.2971	-0.0126213	0.137735	0.0256999	0.397125
WBGene00018393	1050.97	-0.0659247	0.158333	0.0257081	0.397125
WBGene00020579	43.7413	0.0547143	0.151501	0.0257011	0.397125
WBGene00014219	1047.5	0.111003	0.199215	0.0256998	0.397125
WBGene00022008	3.24614	-0.0136363	0.137862	0.0257509	0.3973
WBGene00009724	132.496	0.0783771	0.167201	0.0257995	0.397564
WBGene00012683	10.5815	0.0361766	0.143241	0.0260222	0.397573
WBGene00021167	6.05517	0.0302198	0.141313	0.0264294	0.397573
WBGene00007941	83.8444	-0.0712773	0.161927	0.0260462	0.397573
WBGene00018568	23.5992	0.0580172	0.15334	0.026357	0.397573
WBGene00001119	44.9768	0.046657	0.147563	0.0261969	0.397573
WBGene00003955	2658.44	-0.118156	0.208077	0.0263601	0.397573
WBGene00008075	5.32352	0.0382235	0.144033	0.0259122	0.397573
WBGene00019952	9.27809	0.0325025	0.142087	0.0262866	0.397573
WBGene00021121	140.796	0.0239341	0.139766	0.0263959	0.397573
WBGene00010049	586.786	0.107106	0.194658	0.0259519	0.397573
WBGene00010196	3152.81	0.101383	0.188372	0.0263772	0.397573
WBGene00019703	10.0037	0.0263383	0.140322	0.0261743	0.397573
WBGene00045083	4.02984	0.0180653	0.138524	0.0260324	0.397573
WBGene00003083	1221.36	-0.103117	0.189933	0.0262618	0.397573
WBGene00004418	19861.5	-0.122456	0.212445	0.0262391	0.397573
WBGene00004677	89.9569	0.00917421	0.137354	0.0261891	0.397573
WBGene00010651	9.00911	-0.0187127	0.138666	0.0262628	0.397573
WBGene00044925	7.21022	0.0280959	0.140806	0.0263857	0.397573
WBGene00011733	182.965	0.0459819	0.147278	0.0258727	0.397573
WBGene00014854	22.889	0.0236912	0.139673	0.0264	0.397573
WBGene00020275	7031.91	-0.13036	0.222576	0.0264725	0.397748
WBGene00021253	145.946	0.0702837	0.161183	0.0266653	0.40017
WBGene00013200	648.762	-0.122171	0.211935	0.0267557	0.40105
WBGene00022162	21.3112	-0.00830035	0.137285	0.0268255	0.401145
WBGene00018963	2235.45	-0.0903527	0.177524	0.0268065	0.401145
WBGene00009984	24.6484	0.0465107	0.14743	0.0269578	0.401732
WBGene00012376	335.751	-0.194291	0.30675	0.0269903	0.401732
WBGene00003956	152.955	0.115165	0.203354	0.026992	0.401732
WBGene00022166	160.976	0.119358	0.208362	0.0269242	0.401732
WBGene00003771	1342.74	-0.0816487	0.17015	0.0271027	0.402472
WBGene00018892	3248.62	-0.147711	0.245865	0.0271054	0.402472
WBGene00016172	41.8049	0.0839664	0.171412	0.027187	0.402959
WBGene00009454	5894.51	-0.129128	0.220455	0.0272019	0.402959
WBGene00009457	13.4379	-0.0298015	0.141223	0.0272609	0.403359
WBGene00000465	20967.5	-0.0840029	0.171641	0.0273068	0.403565
WBGene00009898	757.223	0.0756786	0.165076	0.0273999	0.404262
WBGene00009271	35.4791	0.0798459	0.167995	0.0274179	0.404262
WBGene00003847	24.3864	0.0504367	0.149225	0.0274511	0.404279
WBGene00013335	43.0631	0.0527727	0.15046	0.0274902	0.404385
WBGene00021644	334.274	-0.125976	0.216849	0.0275862	0.405325
WBGene00019650	18.9147	0.0713189	0.161667	0.0280222	0.407082
WBGene00009623	57.3026	0.046786	0.147574	0.0280246	0.407082
WBGene00022944	8.2738	0.0293983	0.141135	0.0279385	0.407082
WBGene00007793	3.87908	-0.0116239	0.137611	0.0278544	0.407082
WBGene00013119	19.2003	0.0521823	0.150101	0.0279516	0.407082
WBGene00015541	16.4425	-0.0584041	0.153494	0.0279949	0.407082
WBGene00020379	135.858	-0.0991613	0.1855	0.028028	0.407082
WBGene00022835	1233.8	-0.0945643	0.181092	0.0277413	0.407082
WBGene00004986	2834.49	0.0627682	0.156117	0.0277776	0.407082
WBGene00011367	329.223	0.136317	0.230188	0.0279805	0.407082
WBGene00007605	114.966	0.0997843	0.186054	0.0284639	0.407148
WBGene00013941	5.24357	0.0168569	0.13831	0.0283751	0.407148
WBGene00020182	23.1982	-0.0508713	0.14946	0.0281038	0.407148
WBGene00006066	117.294	-0.0743029	0.164063	0.0282451	0.407148
WBGene00007308	41.1576	-0.0154846	0.138122	0.0282024	0.407148
WBGene00013304	11.8966	-0.0224256	0.139367	0.0285158	0.407148
WBGene00015627	5.94892	-0.0160212	0.138217	0.028386	0.407148
WBGene00012897	655.146	-0.163629	0.266156	0.0285032	0.407148
WBGene00017123	87.0565	-0.0731702	0.162979	0.0284174	0.407148
WBGene00001725	5.52161	-0.0116891	0.13762	0.0283048	0.407148
WBGene00010422	25.0335	0.0514555	0.149716	0.0283422	0.407148
WBGene00016456	22.1195	0.0340694	0.142577	0.0281805	0.407148
WBGene00007579	469.907	-0.208837	0.30402	0.0283288	0.407148
WBGene00013238	2273.73	-0.134171	0.226684	0.028437	0.407148
WBGene00019199	611.14	-0.168282	0.271415	0.0283422	0.407148
WBGene00001431	2188.9	-0.178563	0.285274	0.0286691	0.407616
WBGene00021875	22.501	0.0605874	0.154631	0.0286169	0.407616
WBGene00044704	16.5715	0.0291124	0.141059	0.0286846	0.407616
WBGene00009243	217.99	0.1067	0.193303	0.0287099	0.407616
WBGene00303021	832.029	-0.175531	0.278414	0.028679	0.407616
WBGene00020139	145.145	0.0740212	0.163611	0.0287599	0.407867
WBGene00007958	245.285	0.0664475	0.158428	0.0290232	0.41114
WBGene00017084	775.708	-0.168447	0.273035	0.0290619	0.411227
WBGene00001394	2784.18	0.10294	0.189281	0.0291867	0.412531
WBGene00000229	6238.35	-0.142402	0.236414	0.0292254	0.412617
WBGene00001007	939.511	-0.154602	0.250338	0.0294451	0.415255
WBGene00004475	24978.2	-0.0969906	0.18301	0.0295566	0.415899
WBGene00021352	692.552	0.227303	0.274681	0.029537	0.415899
WBGene00044609	125.832	0.0957496	0.181686	0.0295922	0.415937
WBGene00002269	1261.64	0.0961991	0.182389	0.0297811	0.418127
WBGene00016366	21.0704	0.0270049	0.140455	0.0301476	0.42199
WBGene00020386	38.7267	0.0368475	0.143496	0.0302232	0.42199
WBGene00006929	37434.6	0.0575123	0.152979	0.0302055	0.42199
WBGene00015084	10.4688	-0.0229495	0.139481	0.0301404	0.42199
WBGene00018363	38.6376	0.0421183	0.145507	0.0301677	0.42199
WBGene00015551	278.355	0.178318	0.280921	0.0303018	0.42262
WBGene00020896	2260.55	-0.115523	0.202359	0.0304506	0.424226
WBGene00004003	62.4456	0.0698338	0.160499	0.0305407	0.424546
WBGene00001633	66.5494	-0.0691516	0.159985	0.0305323	0.424546
WBGene00016481	12.383	0.0427782	0.145714	0.0307158	0.426511
WBGene00045265	136.416	-0.0973084	0.182948	0.0308315	0.427648
WBGene00050512	125.789	-0.0346013	0.142714	0.0308874	0.427953
WBGene00003442	50.9318	-0.00949225	0.137384	0.0309236	0.427985
WBGene00008218	8610.03	-0.191705	0.286722	0.0312968	0.428576
WBGene00012696	27.1011	0.0592089	0.153698	0.0311098	0.428576
WBGene00044958	8.95651	0.0229034	0.139505	0.0314411	0.428576
WBGene00235314	3.2696	0.0228376	0.139443	0.0310733	0.428576
WBGene00016894	116.342	0.120139	0.20755	0.0313512	0.428576
WBGene00013790	331.027	-0.0927679	0.178862	0.0311804	0.428576
WBGene00013146	28.2901	0.0404625	0.144862	0.0313704	0.428576
WBGene00016809	100.689	0.0469759	0.147578	0.0313406	0.428576
WBGene00019209	1652.96	-0.12655	0.214817	0.0313089	0.428576
WBGene00020715	35.4989	-0.0148422	0.13802	0.0314396	0.428576
WBGene00009562	65.528	0.117323	0.204238	0.0310355	0.428576
WBGene00017854	63.1567	-0.0469789	0.147546	0.0314307	0.428576
WBGene00019362	9.29725	0.0437531	0.146001	0.0312191	0.428576
WBGene00014179	6.54195	-0.0194559	0.138769	0.0312911	0.428576
WBGene00000083	42.865	-0.0821488	0.169737	0.0315383	0.429438
WBGene00013087	5.07135	-0.0141656	0.137877	0.031638	0.430331
WBGene00000691	128.681	-0.0164944	0.13828	0.0316758	0.430382
WBGene00020003	14.7145	-0.0298349	0.141216	0.0317368	0.430748
WBGene00235331	4.20378	0.0279155	0.140641	0.031891	0.431645
WBGene00000625	9.55214	-0.0278535	0.140716	0.0319054	0.431645
WBGene00012937	4.02051	-0.016236	0.138233	0.031844	0.431645
WBGene00003179	6.79731	0.0293099	0.14103	0.032104	0.43248
WBGene00010982	36.1565	0.0357903	0.143116	0.0320478	0.43248
WBGene00010419	2834.7	-0.165096	0.259461	0.0321032	0.43248
WBGene00016635	98.8098	0.0657947	0.157776	0.032087	0.43248
WBGene00010993	217.314	-0.193065	0.281047	0.0323584	0.434671
WBGene00009542	701.07	-0.121579	0.207566	0.0323698	0.434671
WBGene00007253	4.48001	0.0262226	0.140203	0.0323126	0.434671
WBGene00004302	11873.7	-0.133482	0.222257	0.0325081	0.436065
WBGene00017542	38.412	-0.00988371	0.137419	0.0325466	0.436118
WBGene00014906	3.63376	0.0130047	0.137703	0.0326897	0.437005
WBGene00015391	404.391	-0.134746	0.224334	0.0326825	0.437005
WBGene00004014	1132.16	-0.17001	0.262323	0.0327425	0.437005
WBGene00021766	204.437	0.129552	0.217973	0.0327512	0.437005
WBGene00017640	34.6646	0.0763414	0.16468	0.032885	0.438328
WBGene00001088	4483.63	-0.110637	0.195993	0.0330467	0.438341
WBGene00003963	3591.23	-0.104333	0.18945	0.0330463	0.438341
WBGene00011679	177.316	-0.127952	0.215082	0.0334063	0.438341
WBGene00016191	21.4174	0.051583	0.149543	0.0333368	0.438341
WBGene00044339	325.428	0.0603729	0.15446	0.0331241	0.438341
WBGene00004492	47824.8	-0.0893542	0.175367	0.033091	0.438341
WBGene00013382	24.6828	0.0555143	0.1516	0.0333364	0.438341
WBGene00018069	8.09339	0.043297	0.145785	0.0333761	0.438341
WBGene00019020	6.42769	-0.0275841	0.1406	0.0333618	0.438341
WBGene00021995	6.57316	-0.0171221	0.138341	0.0332188	0.438341
WBGene00011672	31.9251	0.050327	0.148926	0.0329545	0.438341
WBGene00001816	15.3248	-0.0415522	0.145055	0.0333924	0.438341
WBGene00020915	5788.4	-0.0756361	0.164398	0.0332736	0.438341
WBGene00022034	2843.15	-0.0978042	0.182757	0.033172	0.438341
WBGene00022492	400.909	-0.190677	0.279517	0.0331605	0.438341
WBGene00018959	821.251	0.117789	0.203847	0.0334955	0.439055
WBGene00235133	4.28534	0.0216127	0.139166	0.0335571	0.439407
WBGene00194674	1878.26	0.0756462	0.164378	0.0336187	0.439758
WBGene00001404	357.626	-0.210511	0.254993	0.0336831	0.440144
WBGene00001819	102.832	0.118356	0.204291	0.0337472	0.440527
WBGene00001564	333.196	-0.191466	0.275306	0.0338386	0.440802
WBGene00008333	13.4776	-0.0549512	0.15135	0.0339003	0.440802
WBGene00012354	3994.92	-0.104949	0.189856	0.0339003	0.440802
WBGene00004414	23078.8	-0.131051	0.21835	0.0339078	0.440802
WBGene00045084	73.3362	0.0171544	0.138389	0.0340912	0.44273
WBGene00020921	49.8909	0.0532328	0.150449	0.0341329	0.442817
WBGene00021880	3.61445	-0.0111275	0.137551	0.0343464	0.444386
WBGene00077462	12.0654	0.028373	0.14081	0.0343107	0.444386
WBGene00022597	76.4881	0.0755484	0.164225	0.0343594	0.444386
WBGene00003762	865.034	-0.067553	0.158819	0.0344684	0.44458
WBGene00004442	28310.5	-0.0952248	0.180369	0.034436	0.44458
WBGene00021928	81.2968	0.0620007	0.15532	0.0344894	0.44458
WBGene00023424	4.006	-0.0154566	0.13811	0.0345483	0.44458
WBGene00017127	300.89	0.0561937	0.152033	0.0345503	0.44458
WBGene00044475	6.29454	-0.0192909	0.138706	0.0346782	0.445772
WBGene00195952	17.9638	0.0280224	0.140682	0.0347344	0.44604
WBGene00009638	327.471	0.0500561	0.14892	0.0347933	0.446124
WBGene00018795	59.8056	0.106919	0.191301	0.0348115	0.446124
WBGene00045147	71.3804	0.0172522	0.1384	0.0349319	0.447214
WBGene00008993	23.6769	-0.0642048	0.156733	0.0350549	0.447727
WBGene00021625	21.8017	-0.00827672	0.13728	0.0351411	0.447727
WBGene00013866	84.538	0.0688741	0.159538	0.0350887	0.447727
WBGene00004845	8.23511	0.0280337	0.140668	0.0350866	0.447727
WBGene00017980	16.531	0.0405692	0.144753	0.0351492	0.447727
WBGene00045154	4.12397	0.0162245	0.138221	0.0352548	0.448494
WBGene00018969	6.70983	-0.0244103	0.139843	0.0352804	0.448494
WBGene00020661	21.3982	-0.0199764	0.138858	0.0353334	0.448717
WBGene00008767	384.61	-0.101976	0.186667	0.035407	0.449199
WBGene00008634	12.9034	0.0434493	0.145865	0.0356102	0.450127
WBGene00016361	825.012	0.075444	0.163944	0.035784	0.450127
WBGene00019354	2448.4	-0.103387	0.187052	0.0357879	0.450127
WBGene00044478	3.56631	0.0254522	0.140032	0.0356671	0.450127
WBGene00195142	115.108	0.0733273	0.162567	0.03574	0.450127
WBGene00004489	4603.7	-0.101328	0.185368	0.0357957	0.450127
WBGene00015229	3.73849	0.018069	0.138529	0.0357595	0.450127
WBGene00017831	586.43	-0.205143	0.251277	0.0357846	0.450127
WBGene00269434	16.953	0.0345539	0.14261	0.0358007	0.450127
WBGene00000718	18.1974	-0.00604236	0.137117	0.0361542	0.450476
WBGene00019472	5.48835	0.0256383	0.139995	0.0362486	0.450476
WBGene00044174	129.96	0.0457138	0.1469	0.0362833	0.450476
WBGene00044340	15.9012	0.0397389	0.144426	0.0360146	0.450476
WBGene00003465	29.5223	-0.00685739	0.137168	0.03616	0.450476
WBGene00015994	3.8168	-0.0104825	0.137481	0.0358795	0.450476
WBGene00012157	964.556	0.12509	0.21058	0.0362704	0.450476
WBGene00012207	9.48405	-0.0186937	0.138602	0.0359144	0.450476
WBGene00020251	48.0702	0.0742499	0.162957	0.0362099	0.450476
WBGene00011433	10.529	0.0309134	0.141513	0.0361943	0.450476
WBGene00012474	2279.44	-0.0886951	0.175031	0.0361615	0.450476
WBGene00016902	57.4708	-0.0769134	0.164927	0.0362919	0.450476
WBGene00010809	302.421	0.189122	0.267154	0.0360011	0.450476
WBGene00008724	12.6771	-0.0216315	0.13916	0.0366717	0.450589
WBGene00012633	44.2524	0.0406767	0.1448	0.0366419	0.450589
WBGene00021610	6.00632	-0.0246476	0.139707	0.0365544	0.450589
WBGene00009091	167.42	0.0695284	0.159934	0.0365713	0.450589
WBGene00001606	1798.79	-0.142838	0.228265	0.0366656	0.450589
WBGene00008505	5312.77	-0.15548	0.242729	0.0365248	0.450589
WBGene00010920	6.75973	-0.026164	0.140231	0.0366373	0.450589
WBGene00014085	4.14172	-0.0170387	0.138299	0.0366173	0.450589
WBGene00012728	42.3078	0.0403916	0.144721	0.0364978	0.450589
WBGene00013156	475.69	-0.129035	0.213022	0.036703	0.450589
WBGene00236789	3.83856	-0.0225405	0.139221	0.0365212	0.450589
WBGene00001660	140.721	0.0786522	0.166259	0.0367289	0.450589
WBGene00003450	26.3554	-0.0108638	0.137514	0.0367707	0.450663
WBGene00012631	24.123	0.0506095	0.149047	0.0368101	0.450709
WBGene00001977	6582.22	-0.144452	0.231085	0.036851	0.450774
WBGene00000266	77.3166	-0.0716757	0.161286	0.0370717	0.453035
WBGene00020453	5.3729	0.0263444	0.140245	0.0371451	0.453493
WBGene00018645	4.47314	0.0202051	0.138914	0.0372886	0.454806
WBGene00001508	25.8028	0.0715956	0.161147	0.0375912	0.457605
WBGene00010515	24.2683	0.0351624	0.142793	0.0377786	0.457605
WBGene00011339	8.69481	-0.0393123	0.144148	0.0376742	0.457605
WBGene00016061	88.8723	0.0868717	0.172477	0.038008	0.457605
WBGene00022258	10.1787	-0.0396884	0.14432	0.0379371	0.457605
WBGene00007201	538.972	-0.12364	0.207872	0.0380139	0.457605
WBGene00007733	27.9498	-0.0303332	0.141339	0.0378788	0.457605
WBGene00044502	28.1288	-0.0784174	0.165944	0.0380251	0.457605
WBGene00004090	630.038	0.1342	0.214704	0.0379092	0.457605
WBGene00016002	2288.38	-0.0801818	0.167338	0.0378177	0.457605
WBGene00000409	641.724	0.198033	0.248455	0.0376277	0.457605
WBGene00013690	172.015	0.0909382	0.176034	0.0378735	0.457605
WBGene00009442	297.94	0.126062	0.21022	0.0378049	0.457605
WBGene00022490	156.443	0.0697908	0.159947	0.0379764	0.457605
WBGene00006681	4.14509	0.0279647	0.14057	0.0380627	0.457622
WBGene00009539	8.10663	0.0227621	0.139402	0.0382806	0.458452
WBGene00022138	92.0966	-0.110041	0.194355	0.0382902	0.458452
WBGene00045077	22.7095	0.0336759	0.14229	0.0382428	0.458452
WBGene00011811	82.8531	0.0726106	0.161905	0.0382661	0.458452
WBGene00020636	591.408	-0.174111	0.254568	0.0383131	0.458452
WBGene00000065	3296.64	-0.138895	0.226386	0.0391154	0.45998
WBGene00011795	7.83627	-0.0207521	0.138975	0.0387538	0.45998
WBGene00013827	5.45298	0.0188541	0.138626	0.0388751	0.45998
WBGene00000510	6.00092	0.0336898	0.142184	0.0391325	0.45998
WBGene00011107	16.7968	-0.0395322	0.14437	0.0386919	0.45998
WBGene00013307	1202.76	-0.159902	0.243787	0.0385638	0.45998
WBGene00017238	593.061	0.13668	0.220492	0.0390986	0.45998
WBGene00021518	39.8353	-0.083145	0.169317	0.0387454	0.45998
WBGene00022002	3.37505	-0.0108182	0.137513	0.039113	0.45998
WBGene00007633	3.25628	-0.017962	0.138432	0.0390621	0.45998
WBGene00014447	14.6299	0.0290423	0.140963	0.0388882	0.45998
WBGene00018806	453.694	-0.164709	0.247758	0.0386277	0.45998
WBGene00271651	9.9372	0.0334582	0.142215	0.0390619	0.45998
WBGene00009050	1743.25	-0.113027	0.196414	0.0390742	0.45998
WBGene00000878	45.3148	-0.0457528	0.146785	0.0390581	0.45998
WBGene00003055	443.481	-0.0871325	0.172787	0.039058	0.45998
WBGene00008167	101.948	0.0389523	0.144143	0.0390524	0.45998
WBGene00045124	60.6008	0.0524154	0.149873	0.0388705	0.45998
WBGene00045168	5.38612	0.020051	0.138856	0.0387769	0.45998
WBGene00009888	2147.42	-0.0599206	0.153781	0.0392324	0.460298
WBGene00009187	1618.81	-0.135218	0.219312	0.039228	0.460298
WBGene00012144	214.815	0.0559352	0.151696	0.0393496	0.461244
WBGene00017772	1782.7	-0.0901496	0.17519	0.0394042	0.461457
WBGene00009466	13.5868	0.0375871	0.143545	0.0394934	0.462073
WBGene00001526	275.965	-0.12918	0.214316	0.0397535	0.463288
WBGene00007480	7.8901	0.0305568	0.141336	0.0397613	0.463288
WBGene00001427	4568.47	-0.13446	0.223373	0.039717	0.463288
WBGene00004401	10.7199	0.0314764	0.14163	0.0397267	0.463288
WBGene00006591	46.0567	-0.0550628	0.151239	0.0397805	0.463288
WBGene00013263	80.4729	-0.0751775	0.163379	0.0398956	0.463346
WBGene00016627	2113.49	0.16615	0.24922	0.0398631	0.463346
WBGene00020116	9.60134	-0.0265958	0.140347	0.0398787	0.463346
WBGene00011425	4.86866	-0.0198188	0.138834	0.0399689	0.463771
WBGene00012156	1074.65	-0.136881	0.221335	0.0400391	0.46416
WBGene00000051	4.08756	0.0236706	0.139562	0.0404724	0.464223
WBGene00022745	52.752	0.0542974	0.150775	0.0403952	0.464223
WBGene00006433	1468.38	-0.117501	0.200435	0.0402959	0.464223
WBGene00016556	3.2476	0.013081	0.137768	0.0402542	0.464223
WBGene00022849	7.35973	-0.0258753	0.140144	0.0403872	0.464223
WBGene00220226	60.8338	0.0994568	0.183301	0.0404854	0.464223
WBGene00004506	830.812	-0.181267	0.251163	0.0404758	0.464223
WBGene00006715	712.889	-0.0964954	0.180399	0.0402943	0.464223
WBGene00013988	21.5327	-0.0233272	0.139524	0.0404495	0.464223
WBGene00020604	3203.54	-0.0883497	0.173662	0.040366	0.464223
WBGene00021043	257.193	-0.143131	0.225948	0.0404649	0.464223
WBGene00022167	16.8041	0.0371569	0.143418	0.040288	0.464223
WBGene00013107	8.07372	-0.0288242	0.140821	0.0405518	0.464563
WBGene00011800	12.4592	0.0383527	0.143868	0.0406938	0.464925
WBGene00000743	28.6438	-0.00765788	0.137226	0.0407306	0.464925
WBGene00017112	109.259	-0.0103143	0.137457	0.0407011	0.464925
WBGene00010913	832.413	0.134636	0.219729	0.0406915	0.464925
WBGene00018760	62.9033	0.0449891	0.146427	0.0407749	0.46501
WBGene00022590	29.7918	0.0589415	0.153277	0.0408604	0.465566
WBGene00004467	1014.27	-0.153744	0.233322	0.0410745	0.467327
WBGene00001860	3143.68	-0.132427	0.215884	0.041126	0.467327
WBGene00011065	59.9836	0.0702299	0.159967	0.0411058	0.467327
WBGene00017413	176.645	-0.0840948	0.170076	0.0411697	0.467404
WBGene00012760	74.8877	0.0388464	0.14407	0.0412404	0.467786
WBGene00010980	12.2831	-0.0303693	0.141253	0.041312	0.46813
WBGene00022822	3782.69	0.136803	0.219908	0.0413448	0.46813
WBGene00009493	12.0869	0.0458796	0.146655	0.0416178	0.470239
WBGene00017916	470.956	0.107683	0.189641	0.0416249	0.470239
WBGene00004798	181386	-0.0494302	0.14838	0.0416799	0.470239
WBGene00000829	2255.91	0.0842338	0.170153	0.0416439	0.470239
WBGene00020954	20.3133	0.0488922	0.148097	0.0418146	0.471337
WBGene00020282	7.18167	-0.0218613	0.139211	0.0418668	0.471505
WBGene00003583	163.442	0.0843204	0.170108	0.0420834	0.473522
WBGene00021605	143.255	-0.0522179	0.149639	0.0421509	0.473861
WBGene00023183	8.86934	0.0362365	0.143082	0.0423118	0.475246
WBGene00013415	9.10172	0.030213	0.141193	0.0423779	0.47547
WBGene00009054	222.666	0.126902	0.213647	0.042407	0.47547
WBGene00043743	11.8961	-0.021339	0.139072	0.0425843	0.477034
WBGene00003614	35.9076	0.0595407	0.153453	0.0434718	0.477246
WBGene00010174	4915.26	0.0620773	0.154958	0.0432762	0.477246
WBGene00015683	4207.11	0.061667	0.154751	0.0426861	0.477246
WBGene00050956	3.36162	-0.0103746	0.137465	0.0428785	0.477246
WBGene00003828	208.34	0.1039	0.186589	0.0430553	0.477246
WBGene00012326	447.61	-0.11315	0.195333	0.0431982	0.477246
WBGene00003448	39.4923	-0.00860741	0.137296	0.0433636	0.477246
WBGene00004419	23322.8	-0.102582	0.185191	0.0432082	0.477246
WBGene00008027	33.5239	0.0441466	0.145999	0.0434132	0.477246
WBGene00010084	769.618	-0.136768	0.218447	0.0428639	0.477246
WBGene00020827	491.988	-0.160521	0.236663	0.0433202	0.477246
WBGene00021888	847.854	-0.0844535	0.170142	0.0431784	0.477246
WBGene00022046	2046.47	-0.109631	0.191813	0.0434538	0.477246
WBGene00006510	937.963	-0.0958221	0.179393	0.042892	0.477246
WBGene00019590	13.7694	0.0257323	0.140078	0.0431276	0.477246
WBGene00044767	4.37237	-0.0248921	0.139827	0.0434182	0.477246
WBGene00003989	5077.85	-0.100166	0.183132	0.0429592	0.477246
WBGene00009665	450.705	0.160941	0.238254	0.0430865	0.477246
WBGene00014864	4.37499	0.0273081	0.140439	0.0432233	0.477246
WBGene00020346	1314.83	-0.115365	0.197151	0.0431131	0.477246
WBGene00003796	1255.8	-0.110314	0.192618	0.0427749	0.477246
WBGene00013544	2614.15	-0.0837629	0.16905	0.0434227	0.477246
WBGene00019501	6.57674	-0.014142	0.13788	0.0432405	0.477246
WBGene00008957	4.26016	0.0225929	0.139317	0.0438303	0.478686
WBGene00022089	3002.4	-0.125797	0.206955	0.0438149	0.478686
WBGene00206368	3.26635	-0.0104236	0.137469	0.0437294	0.478686
WBGene00008529	5.67249	-0.0262056	0.140118	0.0436912	0.478686
WBGene00000512	114.583	-0.0619625	0.154794	0.0437935	0.478686
WBGene00017162	2951.57	-0.0895643	0.173937	0.0437244	0.478686
WBGene00011173	3.2366	-0.0104811	0.137474	0.0440293	0.47925
WBGene00000012	58.5312	0.0353541	0.142789	0.0440017	0.47925
WBGene00016040	3.89833	-0.0217762	0.139194	0.0440337	0.47925
WBGene00012379	4.17914	-0.0129734	0.137757	0.0439594	0.47925
WBGene00022712	126.757	-0.103639	0.186513	0.0441169	0.479743
WBGene00023468	13.417	0.0247381	0.139847	0.0442132	0.480377
WBGene00018602	1050.42	0.0896624	0.174054	0.0443066	0.480831
WBGene00022036	698.134	-0.107085	0.189156	0.0443638	0.480831
WBGene00004316	13.6654	0.0322615	0.141815	0.0443691	0.480831
WBGene00004988	4114.87	0.0736529	0.162138	0.0445151	0.480873
WBGene00001934	415.764	0.159869	0.235036	0.0445391	0.480873
WBGene00010919	13.1573	0.0518884	0.149337	0.0445436	0.480873
WBGene00002065	596.22	-0.0956656	0.178331	0.0445434	0.480873
WBGene00017142	466.468	0.152992	0.229951	0.0446701	0.480873
WBGene00045074	5.41444	0.0237088	0.139543	0.0446775	0.480873
WBGene00044436	49.167	0.0805727	0.166708	0.0445733	0.480873
WBGene00044438	86.3924	0.0832049	0.168755	0.0446395	0.480873
WBGene00197803	14864.5	0.0267613	0.140348	0.0447283	0.481011
WBGene00008127	25.8356	0.0493863	0.148228	0.0449956	0.482557
WBGene00018375	5.37283	0.0314122	0.141478	0.0450154	0.482557
WBGene00013192	3.50735	-0.0105388	0.137479	0.0449723	0.482557
WBGene00077519	13.8598	-0.0311915	0.141448	0.0450249	0.482557
WBGene00016995	344.457	-0.126593	0.207255	0.0452634	0.484702
WBGene00001829	1373.93	-0.125607	0.205953	0.0454209	0.485394
WBGene00016558	145.66	0.043524	0.145762	0.0454433	0.485394
WBGene00022244	607.241	-0.102484	0.184696	0.0454207	0.485394
WBGene00271779	4.7301	-0.0156644	0.138126	0.0455062	0.485656
WBGene00018145	678.08	-0.136259	0.215569	0.0455625	0.485846
WBGene00008377	5164.74	0.122385	0.203263	0.0456896	0.486088
WBGene00194836	274.913	0.0677017	0.15816	0.0457391	0.486088
WBGene00000160	523.458	0.175463	0.245068	0.0456969	0.486088
WBGene00014177	1767.7	0.168944	0.237057	0.0457341	0.486088
WBGene00011070	38.6072	0.0332949	0.142136	0.0459365	0.487776
WBGene00044797	12.5866	0.0415885	0.14485	0.0460569	0.488559
WBGene00046698	445.651	0.0825332	0.168553	0.0460875	0.488559
WBGene00003057	5.98954	-0.0177968	0.138467	0.0461979	0.488786
WBGene00045093	3.80988	0.0208693	0.139003	0.0461626	0.488786
WBGene00021345	165.7	0.056903	0.151953	0.0462251	0.488786
WBGene00022363	220.945	0.10697	0.188347	0.0463852	0.489858
WBGene00013541	25.033	-0.0467498	0.146918	0.046404	0.489858
WBGene00006366	13.2916	-0.0316824	0.141568	0.0464964	0.490424
WBGene00000560	94.3197	0.0165057	0.138246	0.0466676	0.491819
WBGene00003415	1124.11	-0.125525	0.205201	0.0467916	0.491864
WBGene00014158	7.07562	-0.0229669	0.139374	0.0467528	0.491864
WBGene00044975	4.1429	0.0187577	0.138597	0.046738	0.491864
WBGene00006911	2311.5	-0.163007	0.23112	0.0468276	0.491864
WBGene00002260	6.55151	-0.0256039	0.139986	0.047055	0.49311
WBGene00009449	7.41003	-0.0179528	0.138439	0.0469954	0.49311
WBGene00017444	4.70653	-0.0259272	0.140072	0.0470632	0.49311
WBGene00016379	200.422	0.0760354	0.1635	0.0471034	0.493123
WBGene00017621	136.871	-0.0698925	0.15935	0.0472931	0.494289
WBGene00004416	32026.3	-0.100539	0.182448	0.0472888	0.494289
WBGene00019194	28.8584	0.0260799	0.140148	0.0476067	0.497094
WBGene00003062	2821.88	-0.112018	0.192476	0.0476401	0.497094
WBGene00007153	206.707	0.0587689	0.15287	0.047729	0.49731
WBGene00017881	911.95	0.0921947	0.17562	0.0477396	0.49731
WBGene00020393	291.204	0.0776681	0.164556	0.04787	0.497848
WBGene00000275	1584.3	-0.149303	0.22555	0.0478418	0.497848
WBGene00002055	26.2687	-0.0455113	0.146418	0.0481006	0.498799
WBGene00008390	89.8789	-0.0717896	0.160544	0.0481054	0.498799
WBGene00023460	8.16341	-0.0202082	0.138821	0.0481019	0.498799
WBGene00003577	130.16	0.0992569	0.181309	0.0481193	0.498799
WBGene00013530	1376.89	0.0934964	0.176875	0.0481846	0.499066
WBGene00000002	14.8639	0.0504042	0.148584	0.0482541	0.499376
WBGene00017075	9687.53	-0.137577	0.21424	0.0484388	0.499651
WBGene00045013	27.7205	0.0473738	0.147246	0.0483978	0.499651
WBGene00009125	14.2961	0.0435626	0.145642	0.0484111	0.499651
WBGene00045375	114.225	0.0142643	0.137918	0.0484057	0.499651
WBGene00018930	6.14184	-0.0215656	0.139065	0.0485618	0.500103
WBGene00019608	2668.09	-0.0901346	0.173709	0.048538	0.500103
WBGene00013393	5122.89	0.0855743	0.170509	0.0486085	0.500177
WBGene00009789	27.5074	-0.0386287	0.143801	0.0487181	0.500897
WBGene00018071	565.681	0.114432	0.194881	0.0488159	0.501494
WBGene00003770	9.09786	0.021204	0.139018	0.0491694	0.504715
WBGene00012298	269.401	0.139456	0.215496	0.0493206	0.505856
WBGene00003864	1963.75	-0.111688	0.192248	0.0495178	0.507299
WBGene00011755	38.9961	0.0393286	0.144082	0.0495416	0.507299
WBGene00013473	18.1537	-0.00619122	0.137122	0.0497164	0.508677
WBGene00018294	1457.86	-0.110772	0.191795	0.0497986	0.509106
WBGene00001490	13.1787	-0.0415452	0.144812	0.0498973	0.509291
WBGene00011336	52.5805	-0.00757127	0.137212	0.0498676	0.509291
WBGene00002023	330.072	-0.0920628	0.174955	0.0499791	0.509382
WBGene00017699	403.249	-0.0978791	0.17978	0.0499868	0.509382
WBGene00004427	28148.8	-0.128904	0.206073	0.0500761	0.509881
WBGene00013877	388.524	0.15348	0.222282	0.05032	0.511128
WBGene00004487	28898.9	-0.0941866	0.176599	0.0502925	0.511128
WBGene00007808	40.3793	0.0441115	0.145869	0.0503095	0.511128
WBGene00009969	5.22895	0.0219829	0.139178	0.0505774	0.511362
WBGene00010977	17.3098	0.0386978	0.143792	0.0507759	0.511362
WBGene00022500	723.758	-0.0611123	0.153881	0.0508015	0.511362
WBGene00008148	320.162	-0.100125	0.181252	0.0508286	0.511362
WBGene00012498	25.6189	-0.0605904	0.153544	0.0508242	0.511362
WBGene00000296	4.89342	0.0169218	0.138281	0.050672	0.511362
WBGene00002088	13.8713	-0.0482891	0.147591	0.050478	0.511362
WBGene00003241	1862.23	-0.179626	0.230607	0.0508241	0.511362
WBGene00020501	22.0886	-0.060859	0.1537	0.0505655	0.511362
WBGene00004225	9.59501	-0.0335222	0.142137	0.0507302	0.511362
WBGene00013708	77.2739	0.0693441	0.158751	0.050485	0.511362
WBGene00009443	297.54	0.130916	0.20767	0.0506934	0.511362
WBGene00022649	32.6612	-0.0390022	0.143948	0.050897	0.511642
WBGene00007487	16.6344	-0.038566	0.143819	0.0512039	0.514318
WBGene00020237	19.8713	-0.0230681	0.139389	0.0513579	0.515047
WBGene00017456	20.509	-0.0523118	0.149404	0.0513451	0.515047
WBGene00001122	6.7781	0.0344618	0.142333	0.0516045	0.516291
WBGene00011361	38.1626	0.0429234	0.145377	0.0515629	0.516291
WBGene00004031	136.998	-0.10885	0.189305	0.0515988	0.516291
WBGene00001632	306.222	-0.124093	0.19983	0.0516789	0.516625
WBGene00004788	579.987	-0.112441	0.191547	0.0517216	0.516644
WBGene00001714	3.89266	-0.010186	0.137441	0.0518151	0.517056
WBGene00022087	336.679	-0.0535723	0.150049	0.0518447	0.517056
WBGene00003647	10.5279	0.0283734	0.140587	0.0521563	0.517216
WBGene00019276	190.035	-0.0889011	0.172266	0.0521713	0.517216
WBGene00044213	115.189	0.0645154	0.155872	0.0523142	0.517216
WBGene00020595	5.53004	0.0284317	0.14066	0.0523929	0.517216
WBGene00007777	6.34683	-0.0254961	0.139962	0.0522877	0.517216
WBGene00017140	37.472	0.0570894	0.151639	0.0521371	0.517216
WBGene00000832	104.087	-0.0619692	0.154388	0.0521833	0.517216
WBGene00013894	3362.75	-0.11292	0.191759	0.0522431	0.517216
WBGene00016388	4.53156	-0.0122325	0.137604	0.0521249	0.517216
WBGene00017733	1991.04	-0.12836	0.204601	0.0521728	0.517216
WBGene00043056	613.97	-0.0741943	0.161809	0.0519839	0.517216
WBGene00003978	36.2143	0.0516673	0.149109	0.0522895	0.517216
WBGene00014458	4.36758	0.0150762	0.138004	0.0523879	0.517216
WBGene00012535	10.2528	-0.0368993	0.143165	0.0524888	0.517432
WBGene00194828	25.9747	0.0101195	0.137429	0.0524967	0.517432
WBGene00014095	7447.62	-0.139196	0.212323	0.0527596	0.519214
WBGene00018144	14.8116	0.0476211	0.147235	0.0527362	0.519214
WBGene00020408	252.727	-0.0574966	0.151922	0.0529145	0.520332
WBGene00000730	10.651	-0.0266253	0.140252	0.0532101	0.520382
WBGene00004810	199.691	0.056732	0.151594	0.0530288	0.520382
WBGene00017653	7.31699	0.0277635	0.140467	0.0533345	0.520382
WBGene00017957	7.41799	0.0245808	0.139735	0.0535784	0.520382
WBGene00008260	31.9919	-0.0675529	0.157479	0.0531664	0.520382
WBGene00008589	17.0214	0.0512282	0.148893	0.0534075	0.520382
WBGene00007734	4.70126	0.0180806	0.138434	0.0531841	0.520382
WBGene00019900	8145.1	-0.0995805	0.180454	0.0529699	0.520382
WBGene00021197	19.0638	0.0361004	0.142893	0.0531364	0.520382
WBGene00000653	48.0603	-0.0123845	0.137678	0.0534503	0.520382
WBGene00007913	8.86928	0.0360715	0.142842	0.0532298	0.520382
WBGene00013696	15.2416	-0.0241665	0.13962	0.0534929	0.520382
WBGene00021275	5.82035	0.0296917	0.140972	0.0534458	0.520382
WBGene00022150	680.74	-0.0995165	0.179367	0.0535412	0.520382
WBGene00220004	7.23981	0.0214436	0.139028	0.0535607	0.520382
WBGene00004326	1695.98	-0.106451	0.186769	0.0532568	0.520382
WBGene00077488	4.52095	0.0177633	0.138405	0.053662	0.520794
WBGene00019111	21.3213	-0.0376393	0.143362	0.0537244	0.520998
WBGene00010289	17.1319	-0.0312706	0.141467	0.0538627	0.521939
WBGene00009361	50.4255	-0.0755164	0.162617	0.0539305	0.522196
WBGene00019174	6.80509	0.0362296	0.142884	0.0540052	0.522519
WBGene00009878	1011.5	-0.149722	0.219736	0.054108	0.522713
WBGene00011037	274.761	-0.116501	0.193819	0.0541037	0.522713
WBGene00044773	207.062	0.0769521	0.163487	0.0544137	0.525264
WBGene00010897	179.553	0.117238	0.1947	0.0544731	0.525437
WBGene00016461	54.8408	-0.0360468	0.142884	0.0546608	0.526845
WBGene00015705	8.05021	0.0293255	0.140779	0.0549173	0.528511
WBGene00017864	624.152	-0.115654	0.194971	0.0549137	0.528511
WBGene00007200	31.908	0.0569934	0.151597	0.0550024	0.528525
WBGene00022583	1768.89	0.089594	0.172479	0.0549693	0.528525
WBGene00009884	17.5622	-0.0256109	0.139933	0.0550976	0.529038
WBGene00001051	2880.77	-0.0960316	0.177374	0.0553148	0.53072
WBGene00022538	15.7997	0.0349902	0.142526	0.0558602	0.531513
WBGene00000742	29.0175	-0.0134161	0.137783	0.0558219	0.531513
WBGene00007288	7.17126	0.0268293	0.140249	0.0556327	0.531513
WBGene00000376	2553.38	-0.122661	0.198187	0.0558273	0.531513
WBGene00013325	222.584	-0.127481	0.203101	0.0558503	0.531513
WBGene00013806	22.2864	0.0630847	0.154708	0.055558	0.531513
WBGene00020679	982.64	-0.126137	0.201987	0.0556204	0.531513
WBGene00006636	26.0771	0.0485847	0.147604	0.0558413	0.531513
WBGene00021786	9.74122	-0.0170603	0.138324	0.0557194	0.531513
WBGene00011232	2499.09	-0.147527	0.213004	0.055634	0.531513
WBGene00014456	6.29436	0.0170351	0.138288	0.0558363	0.531513
WBGene00006714	39.0764	0.0770213	0.163349	0.0564488	0.532004
WBGene00219613	12.2381	0.0239153	0.139579	0.0563783	0.532004
WBGene00015716	18.5403	0.0442933	0.145774	0.0563795	0.532004
WBGene00012783	43.6221	0.050029	0.148242	0.0559767	0.532004
WBGene00020649	19.3964	0.0487083	0.147511	0.0560898	0.532004
WBGene00000198	1733.92	-0.10181	0.181557	0.0562248	0.532004
WBGene00008431	183.401	0.11783	0.19426	0.0564264	0.532004
WBGene00023407	55.4837	-0.0818973	0.166646	0.0563945	0.532004
WBGene00004888	5500.23	-0.0953156	0.175622	0.0564257	0.532004
WBGene00004915	3142.99	-0.0848367	0.168517	0.0564535	0.532004
WBGene00008514	173.253	-0.119978	0.195654	0.0564778	0.532004
WBGene00009440	767.471	-0.115978	0.192945	0.0564947	0.532004
WBGene00012660	346.255	-0.102577	0.182452	0.0565012	0.532004
WBGene00016523	6.25793	-0.0215104	0.139111	0.0562462	0.532004
WBGene00009769	69.368	0.0599355	0.152972	0.0566401	0.532167
WBGene00010900	14.2078	-0.00871391	0.137299	0.0566448	0.532167
WBGene00013693	10.2708	0.0377557	0.143402	0.0566109	0.532167
WBGene00008389	5.43283	0.0198595	0.138736	0.0568291	0.533501
WBGene00045163	4.28609	0.0156393	0.138077	0.0569397	0.534142
WBGene00195356	13.6579	0.0353069	0.14257	0.0571492	0.53571
WBGene00219307	17.1065	0.0400722	0.144143	0.057265	0.536398
WBGene00006523	855.82	-0.12896	0.20072	0.0573393	0.536414
WBGene00003087	230.915	-0.100167	0.180318	0.0574264	0.536414
WBGene00002344	3296.11	-0.109434	0.187184	0.0576488	0.536414
WBGene00007358	8.4016	0.0293752	0.140798	0.0576283	0.536414
WBGene00013647	413.858	0.0936696	0.175221	0.057428	0.536414
WBGene00016541	18.2432	-0.0070877	0.137178	0.0576087	0.536414
WBGene00022761	12.1199	-0.0308266	0.141265	0.0575714	0.536414
WBGene00044389	65.8323	0.0552355	0.150685	0.057601	0.536414
WBGene00284847	5.75303	0.0321392	0.141645	0.0574856	0.536414
WBGene00021929	787.322	-0.101111	0.180313	0.0577583	0.537038
WBGene00010471	277.148	0.0887791	0.17134	0.0578308	0.537316
WBGene00044922	81.5808	-0.050235	0.148233	0.0580251	0.537756
WBGene00006924	9018.55	-0.0919375	0.173593	0.0580909	0.537756
WBGene00019139	51.9009	0.0973983	0.177654	0.0580604	0.537756
WBGene00005712	43.2846	0.0526245	0.149363	0.0580599	0.537756
WBGene00018793	1463.28	-0.109227	0.186955	0.0580274	0.537756
WBGene00016644	153.094	0.0567079	0.151388	0.0583957	0.538966
WBGene00008490	5.14961	0.0275564	0.140345	0.0585038	0.538966
WBGene00018681	560.915	-0.0740569	0.161134	0.058555	0.538966
WBGene00044952	11.4394	0.0243114	0.139662	0.058325	0.538966
WBGene00018782	778.423	-0.100115	0.179766	0.0583984	0.538966
WBGene00001595	1164.87	-0.110533	0.188132	0.0584689	0.538966
WBGene00009269	4.71932	-0.0154593	0.138018	0.0584929	0.538966
WBGene00022149	946.767	-0.134507	0.205289	0.0585629	0.538966
WBGene00008099	35.504	0.0415757	0.144733	0.0587034	0.539494
WBGene00008139	83.7814	0.107054	0.185123	0.0587057	0.539494
WBGene00050946	12.9692	0.047415	0.146986	0.0587994	0.539963
WBGene00007029	2069.57	-0.140391	0.214736	0.0589446	0.540845
WBGene00011061	2747.51	-0.143938	0.20925	0.058981	0.540845
WBGene00018590	19.1764	0.0435444	0.145453	0.0591518	0.540889
WBGene00017246	25.1045	-0.0337198	0.142064	0.0591457	0.540889
WBGene00000673	1638.12	-0.0585026	0.152412	0.0590626	0.540889
WBGene00010782	5.30617	0.0296417	0.140928	0.0591899	0.540889
WBGene00022181	24.9829	0.0474835	0.14703	0.0591999	0.540889
WBGene00004505	2985.88	-0.0764588	0.162646	0.059574	0.543595
WBGene00014697	7.95766	-0.0291793	0.140759	0.059582	0.543595
WBGene00000558	235.16	0.0350872	0.14252	0.0597025	0.544301
WBGene00010731	988.152	-0.0820508	0.16615	0.0598165	0.544947
WBGene00015778	499.616	-0.146306	0.20931	0.0599348	0.545481
WBGene00019932	29.5855	0.0401703	0.144205	0.0600046	0.545481
WBGene00173303	3.78102	0.0244953	0.139613	0.0600027	0.545481
WBGene00010959	2659.62	0.0931068	0.174788	0.0600517	0.545516
WBGene00012768	3000.16	-0.13861	0.204998	0.0602354	0.546008
WBGene00019772	14.1493	0.0371935	0.143153	0.0602139	0.546008
WBGene00009140	517.923	0.0826642	0.166807	0.0601796	0.546008
WBGene00000931	1702.19	-0.102455	0.181093	0.0604021	0.547126
WBGene00013901	44.261	0.0348584	0.142453	0.0605818	0.547671
WBGene00020324	4.29521	-0.0253001	0.139812	0.0605725	0.547671
WBGene00015910	4.96346	-0.0273563	0.140277	0.0605922	0.547671
WBGene00017541	553.859	0.0821054	0.1666	0.0607917	0.548297
WBGene00219715	5.23719	0.0258544	0.139954	0.0607675	0.548297
WBGene00019800	998.507	-0.121096	0.195673	0.0607284	0.548297
WBGene00021114	398.547	0.0985767	0.178069	0.0609766	0.548789
WBGene00044120	3.58735	-0.0184185	0.138419	0.0609477	0.548789
WBGene00004027	2693.36	-0.0667904	0.156871	0.060893	0.548789
WBGene00022072	334.144	-0.0827708	0.166567	0.0610546	0.5491
WBGene00004450	68166.5	-0.0656305	0.155937	0.0611821	0.549856
WBGene00011637	549.93	0.115184	0.190613	0.0612357	0.549946
WBGene00017919	46.1146	0.0571433	0.151368	0.0613077	0.550201
WBGene00044101	4.57035	0.0132677	0.137763	0.0615436	0.551066
WBGene00003661	226.618	-0.0698738	0.158575	0.0614593	0.551066
WBGene00045268	592.785	0.0680876	0.157432	0.0615784	0.551066
WBGene00010905	457.207	-0.110201	0.187164	0.0615774	0.551066
WBGene00012840	654.9	-0.0472704	0.146926	0.061718	0.551924
WBGene00045129	727.714	0.0117052	0.137589	0.0618928	0.553096
WBGene00044291	40.9814	0.0354429	0.142609	0.062075	0.5531
WBGene00008959	619.523	-0.0791769	0.164135	0.0620656	0.5531
WBGene00001752	24.5489	-0.0486854	0.147336	0.0620405	0.5531
WBGene00001823	135.965	0.0781839	0.163533	0.0621122	0.5531
WBGene00017304	174.845	0.0971789	0.17702	0.061967	0.5531
WBGene00013684	3.68678	-0.0124584	0.137598	0.0623569	0.554889
WBGene00044188	435.121	0.148244	0.205279	0.0624785	0.55558
WBGene00044623	4.9762	0.0137402	0.137819	0.0626369	0.556597
WBGene00019651	90.6535	0.0699202	0.158379	0.0627975	0.556848
WBGene00017076	29.3971	0.0440516	0.145608	0.0627876	0.556848
WBGene00019060	59.95	-0.0421435	0.144832	0.0627246	0.556848
WBGene00018273	5.33868	0.021152	0.138947	0.0631569	0.558991
WBGene00017063	40.2555	0.039918	0.144059	0.0631718	0.558991
WBGene00220168	40.1175	0.0306165	0.141119	0.063112	0.558991
WBGene00003901	5810.91	-0.0634861	0.15466	0.0632414	0.559215
WBGene00016407	8.16682	0.0386061	0.14353	0.0634082	0.559516
WBGene00012606	114.814	-0.0728715	0.160243	0.0633563	0.559516
WBGene00020189	248.306	-0.136131	0.202146	0.0633876	0.559516
WBGene00013847	75.6299	0.0437335	0.145453	0.0635714	0.560564
WBGene00006705	5.31687	-0.0196641	0.138679	0.0637071	0.560741
WBGene00011019	13.2218	0.0325582	0.141667	0.0637246	0.560741
WBGene00045368	17.4856	0.0263335	0.140073	0.0636522	0.560741
WBGene00018516	22.8542	-0.0586657	0.152059	0.0637915	0.560939
WBGene00195147	4.73963	-0.019727	0.138678	0.0640649	0.56256
WBGene00006982	16.8287	0.0496108	0.147829	0.0640342	0.56256
WBGene00005000	211.584	0.0535056	0.149636	0.0642456	0.563364
WBGene00013689	3629.16	-0.0568436	0.15137	0.0642409	0.563364
WBGene00003685	73.3899	0.0623756	0.154026	0.0643151	0.563582
WBGene00004448	58369.1	-0.0635888	0.154635	0.0644242	0.563756
WBGene00009173	353.234	0.108089	0.184401	0.0643938	0.563756
WBGene00003162	2212.72	-0.115162	0.187948	0.0645384	0.564365
WBGene00021795	302.934	0.0807979	0.16504	0.0648207	0.565975
WBGene00000189	543.601	0.114712	0.18905	0.0648333	0.565975
WBGene00020200	47.2225	0.0648602	0.155338	0.0648569	0.565975
WBGene00189958	87.7236	0.0389113	0.14372	0.0649638	0.566516
WBGene00019727	77.8944	-0.0749711	0.161519	0.0650297	0.5667
WBGene00021379	17.6461	-0.0365052	0.142806	0.0652402	0.567751
WBGene00018953	6555.69	-0.0627813	0.154186	0.0652367	0.567751
WBGene00016340	13.9225	0.0356088	0.14256	0.06532	0.567988
WBGene00009476	64.1187	0.0441588	0.145626	0.0653573	0.567988
WBGene00011450	4.11265	0.0206159	0.138879	0.0654217	0.568157
WBGene00008748	78.9937	0.0555487	0.150503	0.0654899	0.568359
WBGene00001578	49.0595	-0.0581947	0.151645	0.0660429	0.56852
WBGene00005018	21.3814	-0.0320036	0.141506	0.0660397	0.56852
WBGene00045151	3.70316	0.0129869	0.137722	0.0656332	0.56852
WBGene00013379	504.634	0.0850868	0.16774	0.0659818	0.56852
WBGene00045078	211.835	0.0677342	0.157046	0.0660239	0.56852
WBGene00003435	96.4424	-0.0088824	0.137307	0.0656904	0.56852
WBGene00016018	116.635	-0.0906586	0.17143	0.06569	0.56852
WBGene00004445	25593	-0.0805235	0.164631	0.0660616	0.56852
WBGene00010243	8.11622	0.0352016	0.142482	0.0658904	0.56852
WBGene00003372	1806.48	-0.113687	0.18782	0.0659284	0.56852
WBGene00008348	46.8845	0.0624557	0.154015	0.065579	0.56852
WBGene00020449	8.1789	0.032894	0.141707	0.0658263	0.56852
WBGene00021852	113.035	0.0929885	0.173016	0.0660934	0.56852
WBGene00015791	288.721	-0.0595667	0.152367	0.0663288	0.568996
WBGene00235359	3.36362	-0.00845239	0.13728	0.0663277	0.568996
WBGene00012545	24.523	0.0699729	0.158041	0.0662864	0.568996
WBGene00022194	650.796	0.0951106	0.174743	0.0662927	0.568996
WBGene00010368	4.35855	-0.0240773	0.13954	0.0663743	0.569
WBGene00004758	92.1572	-0.10003	0.177837	0.0665143	0.569591
WBGene00021633	32.9928	-0.0449553	0.145894	0.0665334	0.569591
WBGene00003541	4.33682	-0.0234276	0.139447	0.066621	0.569955
WBGene00019720	33.2992	0.0354396	0.142538	0.0668016	0.571113
WBGene00235296	5.82884	0.0279486	0.140389	0.0672956	0.574559
WBGene00271643	3.77151	0.0174263	0.138324	0.0672592	0.574559
WBGene00016768	33.3035	0.0566141	0.150841	0.0673836	0.574921
WBGene00008426	16.2349	0.0391203	0.143634	0.0674948	0.575482
WBGene00013345	13.7456	0.0276906	0.140313	0.0677005	0.575682
WBGene00018361	2145.13	-0.0733834	0.160064	0.0676658	0.575682
WBGene00011501	8604.9	-0.0922278	0.172278	0.0676521	0.575682
WBGene00013033	4.3459	-0.0144832	0.137819	0.0676791	0.575682
WBGene00004928	41.5013	-0.0654391	0.155587	0.0679026	0.576008
WBGene00007286	47.5259	-0.0561322	0.150751	0.0679212	0.576008
WBGene00011984	12.7016	0.0402416	0.144061	0.0678319	0.576008
WBGene00016353	242.497	0.0670937	0.156414	0.0677857	0.576008
WBGene00015089	7.24338	-0.0186613	0.138526	0.0680293	0.576538
WBGene00022951	403.704	0.0461471	0.146357	0.0682426	0.577191
WBGene00007112	260.863	0.0242215	0.13961	0.0682315	0.577191
WBGene00003392	2095.69	-0.100696	0.177077	0.0682434	0.577191
WBGene00003031	9.46652	0.031593	0.141314	0.0683833	0.577411
WBGene00011423	320.389	0.0521471	0.148869	0.0684522	0.577411
WBGene00017711	6.68953	-0.0266604	0.140088	0.0683944	0.577411
WBGene00021349	23.7932	0.0368441	0.143001	0.0684287	0.577411
WBGene00008392	27.0046	0.044072	0.145538	0.0689337	0.578403
WBGene00000072	30.778	0.0418227	0.144647	0.0687535	0.578403
WBGene00000751	9078.27	-0.0776087	0.162538	0.0687517	0.578403
WBGene00235356	1358.46	-0.0800789	0.164111	0.0688584	0.578403
WBGene00019248	9.80334	-0.0172024	0.138296	0.0688981	0.578403
WBGene00020398	398.909	0.104217	0.180546	0.068684	0.578403
WBGene00020990	17.5726	-0.00489157	0.13704	0.068936	0.578403
WBGene00000179	124.346	0.0584783	0.15181	0.0688769	0.578403
WBGene00010958	20275.4	0.0398747	0.144017	0.0691023	0.579414
WBGene00017901	10.2666	0.025238	0.139785	0.0691545	0.579467
WBGene00013854	17.7833	-0.00352041	0.136988	0.0695214	0.580804
WBGene00017506	1248.28	-0.0738901	0.159534	0.0694459	0.580804
WBGene00022415	6.66095	-0.0229861	0.139361	0.0695306	0.580804
WBGene00017922	5.92322	-0.0193659	0.138631	0.0695605	0.580804
WBGene00021883	1438.25	-0.112174	0.185184	0.0697057	0.580804
WBGene00008053	2506.83	-0.126213	0.193859	0.0697278	0.580804
WBGene00014965	134.895	0.0773452	0.162233	0.0696726	0.580804
WBGene00021664	8.16416	0.0205048	0.138804	0.0695545	0.580804
WBGene00010957	806.786	0.0527107	0.149026	0.0696446	0.580804
WBGene00006416	5.01227	-0.0179123	0.138338	0.0698324	0.581292
WBGene00019719	756.398	-0.111706	0.183734	0.069935	0.581763
WBGene00019510	11410.2	-0.0745255	0.160552	0.0700113	0.581912
WBGene00189949	357.036	0.0717974	0.158311	0.070091	0.581912
WBGene00003594	201.868	0.0936449	0.17249	0.0700468	0.581912
WBGene00219759	5.37628	0.0288488	0.140606	0.0701843	0.581922
WBGene00006702	1327.77	-0.100959	0.177708	0.0701464	0.581922
WBGene00011773	608.43	0.110823	0.184599	0.0703292	0.582599
WBGene00021466	971.249	-0.0933692	0.172413	0.0703582	0.582599
WBGene00021012	372.52	-0.0944244	0.173334	0.0704156	0.582693
WBGene00000728	118.104	-0.0559536	0.150564	0.0706183	0.583736
WBGene00003444	9.99959	-0.00635921	0.137113	0.0706341	0.583736
WBGene00015392	214.15	0.0564326	0.150862	0.0707802	0.583943
WBGene00016759	25.1089	0.0319421	0.141402	0.0707219	0.583943
WBGene00001229	462.881	-0.112273	0.185256	0.0707978	0.583943
WBGene00013149	4.71586	0.0207864	0.138827	0.0709204	0.584573
WBGene00012344	2566.76	-0.0836013	0.165206	0.0710292	0.585088
WBGene00021190	68.592	0.073112	0.159564	0.0713185	0.586795
WBGene00219803	35.2007	-0.0591975	0.15206	0.0713758	0.586795
WBGene00018867	729.65	0.116294	0.187028	0.0713433	0.586795
WBGene00004995	1153.32	0.106313	0.181285	0.071575	0.586906
WBGene00009895	284.027	0.0224898	0.139237	0.0714907	0.586906
WBGene00020403	801.096	0.140668	0.195364	0.0715065	0.586906
WBGene00004857	158.13	0.0629385	0.153958	0.0715444	0.586906
WBGene00007677	5.87633	0.0245449	0.13959	0.0717197	0.58733
WBGene00001558	870.1	-0.131353	0.19378	0.0717176	0.58733
WBGene00206356	4.69428	0.0197376	0.138664	0.071842	0.587951
WBGene00011803	69.6516	0.03977	0.143891	0.0719479	0.588236
WBGene00021020	148.546	0.0778121	0.162569	0.07197	0.588236
WBGene00023431	3.90949	0.0166552	0.138213	0.0720559	0.588557
WBGene00000626	31.6955	-0.0067438	0.137147	0.0722794	0.590001
WBGene00017059	3.23093	-0.0117373	0.137582	0.0723643	0.590313
WBGene00003602	3.25873	-0.0200003	0.138719	0.0724249	0.590426
WBGene00010722	5.57791	-0.0234802	0.139286	0.072738	0.591592
WBGene00019410	33.4247	-0.00930691	0.137337	0.0726881	0.591592
WBGene00022891	7.62111	0.0378706	0.1432	0.0727551	0.591592
WBGene00004459	2442.92	-0.0975144	0.172954	0.0727149	0.591592
WBGene00000655	3.29231	-0.00840369	0.137275	0.072828	0.591803
WBGene00011190	7.63318	-0.0231847	0.139345	0.0730341	0.592688
WBGene00019403	87.0204	-0.0738715	0.160191	0.0732203	0.592688
WBGene00012875	94.2437	-0.0501416	0.147781	0.0731282	0.592688
WBGene00018435	26.2965	0.0402542	0.144037	0.0732289	0.592688
WBGene00004460	2064.73	-0.114291	0.185275	0.0731683	0.592688
WBGene00011407	122.699	0.039492	0.143794	0.0732114	0.592688
WBGene00022599	4985.73	-0.142774	0.192135	0.0732652	0.592688
WBGene00010079	32.5041	0.0383684	0.143393	0.0734143	0.593515
WBGene00021276	556.743	-0.0980702	0.174542	0.0735163	0.593677
WBGene00003952	1921.54	-0.120542	0.188345	0.0735284	0.593677
WBGene00018031	3.21152	-0.013005	0.137724	0.0737457	0.595052
WBGene00018776	3993.34	-0.0637122	0.154307	0.0738171	0.595248
WBGene00010963	4071.48	0.0901141	0.17056	0.0738907	0.595461
WBGene00001864	267.787	0.0908959	0.170258	0.0740767	0.59583
WBGene00013081	894.851	0.0731778	0.159417	0.0741482	0.59583
WBGene00020994	1241.63	-0.108004	0.181156	0.0743283	0.59583
WBGene00044937	6.23988	0.0263828	0.14003	0.0743965	0.59583
WBGene00002079	1789.52	-0.0743285	0.160012	0.0740552	0.59583
WBGene00013956	16.2952	-0.00351747	0.136988	0.074408	0.59583
WBGene00002186	5.77386	-0.0145529	0.137919	0.0742822	0.59583
WBGene00012550	2191.55	-0.0976442	0.174701	0.0743991	0.59583
WBGene00017320	8.64726	-0.0277435	0.140257	0.0743521	0.59583
WBGene00017754	4.56717	0.019653	0.138676	0.0743752	0.59583
WBGene00022738	1441.8	-0.0758817	0.160993	0.0745131	0.596293
WBGene00000555	3.72245	0.0127273	0.137631	0.0746285	0.596839
WBGene00008852	883.819	-0.108421	0.18228	0.0751078	0.598778
WBGene00077764	528.541	0.0678213	0.156217	0.0750691	0.598778
WBGene00001749	2706.48	-0.0872787	0.168959	0.075024	0.598778
WBGene00003391	2542.01	-0.0898928	0.168998	0.0750693	0.598778
WBGene00007580	1278.79	-0.120443	0.184466	0.0749932	0.598778
WBGene00235346	367.947	-0.0874519	0.168063	0.0753019	0.599946
WBGene00012087	15.9804	-0.00353443	0.136989	0.0755389	0.601276
WBGene00015124	13.8069	0.035933	0.142522	0.075564	0.601276
WBGene00016428	3.94136	0.0196749	0.138671	0.07565	0.601582
WBGene00013858	15.9221	-0.00351609	0.136988	0.0757547	0.602036
WBGene00015517	27.1338	0.0507957	0.147965	0.0758611	0.602502
WBGene00021076	198.086	0.0925471	0.171473	0.0759777	0.602671
WBGene00011920	382.86	0.0720665	0.158753	0.0759363	0.602671
WBGene00008421	14.7486	0.0425881	0.144678	0.076251	0.604459
WBGene00009580	867.864	-0.0850296	0.16582	0.0764252	0.605344
WBGene00020020	9.69891	0.0373833	0.142986	0.0764585	0.605344
WBGene00009854	6.8774	0.0216054	0.138994	0.0765309	0.605538
WBGene00016351	10.6437	-0.00601079	0.137094	0.0766525	0.605742
WBGene00022983	50.4266	0.0388993	0.143528	0.076641	0.605742
WBGene00020647	1366.04	0.0871014	0.16846	0.0767758	0.606096
WBGene00000020	19.8613	0.0497727	0.14761	0.0767933	0.606096
WBGene00020349	255.424	0.0551068	0.149988	0.0769579	0.607016
WBGene00009429	13.1498	-0.0258438	0.139865	0.0771934	0.608129
WBGene00002258	1364.33	0.100716	0.176264	0.0771953	0.608129
WBGene00016629	19.9845	-0.049206	0.147224	0.0772575	0.60824
WBGene00013895	14.0976	-0.029005	0.140649	0.0773525	0.608609
WBGene00012142	50.676	0.0828566	0.164957	0.0775842	0.609802
WBGene00020246	2059.37	-0.105951	0.177107	0.0780506	0.609802
WBGene00003628	84.9332	0.0668103	0.15572	0.0777866	0.609802
WBGene00019225	38.2126	0.0453191	0.145754	0.0779788	0.609802
WBGene00019779	219.562	0.0863601	0.167443	0.078026	0.609802
WBGene00015330	533.428	-0.113968	0.183533	0.0780319	0.609802
WBGene00020831	262.442	-0.0716567	0.158584	0.0781314	0.609802
WBGene00044967	80.4232	0.0322718	0.14145	0.0776745	0.609802
WBGene00016416	21.4163	-0.00699967	0.137163	0.0779861	0.609802
WBGene00017283	556.959	0.128509	0.185372	0.0777773	0.609802
WBGene00002107	18.5428	0.0427971	0.144925	0.0779042	0.609802
WBGene00021328	8.8839	0.0303662	0.140941	0.0777711	0.609802
WBGene00045150	4.08266	0.0128948	0.137693	0.0780981	0.609802
WBGene00016013	11.0187	-0.0210674	0.138874	0.0781872	0.60986
WBGene00015939	384.061	0.0847698	0.1661	0.0782902	0.610287
WBGene00022378	693.259	-0.0903499	0.17089	0.0784798	0.611388
WBGene00020588	6445.35	-0.110748	0.181477	0.0785902	0.61176
WBGene00006508	72.3609	0.0628385	0.153548	0.0786244	0.61176
WBGene00012693	527.732	-0.0832112	0.16466	0.0789053	0.611792
WBGene00269384	24.6712	0.0502058	0.14773	0.0788896	0.611792
WBGene00077690	47.8427	-0.0661113	0.155349	0.0789191	0.611792
WBGene00011042	3.47338	0.0224219	0.139174	0.0787897	0.611792
WBGene00016460	64.0812	0.0842161	0.165554	0.0787663	0.611792
WBGene00045376	6.28373	0.0250831	0.13968	0.0786913	0.611792
WBGene00004776	5.29452	0.0239627	0.139393	0.0790591	0.612502
WBGene00002095	17.1312	0.0343892	0.142021	0.0791534	0.612739
WBGene00007600	7.96624	-0.0323803	0.141511	0.0792836	0.612739
WBGene00021113	15.0116	-0.00351481	0.136988	0.0792488	0.612739
WBGene00019682	1095.42	0.0816289	0.164273	0.0792006	0.612739
WBGene00012130	37.4302	-0.0545309	0.149556	0.0794761	0.61353
WBGene00019515	27.0057	0.0412799	0.144249	0.0794831	0.61353
WBGene00009965	8.4416	0.0307422	0.141024	0.0796146	0.61358
WBGene00010450	406.586	0.104727	0.178094	0.0796352	0.61358
WBGene00016165	33.1623	0.0557842	0.150025	0.0796035	0.61358
WBGene00015400	255.206	0.0532041	0.149024	0.0798389	0.614774
WBGene00219572	43.8726	0.0322679	0.141476	0.0799388	0.615169
WBGene00013906	16.0378	0.0359859	0.14252	0.080119	0.61618
WBGene00000218	5635.1	0.0521805	0.148361	0.0803957	0.616839
WBGene00003689	8.44956	0.0309032	0.141042	0.0803786	0.616839
WBGene00006692	5.82934	-0.0256339	0.139786	0.0805666	0.616839
WBGene00011832	22.6746	0.051773	0.148198	0.080478	0.616839
WBGene00004756	407.962	-0.115025	0.183157	0.0803499	0.616839
WBGene00020300	1461	0.0709955	0.157417	0.0805724	0.616839
WBGene00010198	1411.57	-0.0705297	0.157504	0.0805952	0.616839
WBGene00022880	983.847	-0.115787	0.184816	0.0805829	0.616839
WBGene00007495	7.64239	0.0262906	0.139904	0.0807303	0.617499
WBGene00017448	23.8022	0.0556888	0.149937	0.0807857	0.617549
WBGene00002250	1294.09	-0.0735199	0.158802	0.0811226	0.617873
WBGene00003764	238.855	0.051918	0.148423	0.0823847	0.617873
WBGene00003844	158.633	-0.0768439	0.161026	0.0812398	0.617873
WBGene00003927	1805.9	-0.0736494	0.159199	0.0812783	0.617873
WBGene00004336	2298.46	-0.126489	0.187439	0.0833708	0.617873
WBGene00008221	10.5717	-0.0266568	0.14009	0.082687	0.617873
WBGene00008894	3.49646	0.0195826	0.138638	0.0809787	0.617873
WBGene00009804	9.12595	0.0315104	0.14115	0.0831343	0.617873
WBGene00010187	5.40728	0.0276016	0.140225	0.0815061	0.617873
WBGene00010474	14.2995	-0.00350968	0.136987	0.0822322	0.617873
WBGene00011006	54.2438	0.0450396	0.145568	0.0825303	0.617873
WBGene00011589	368.463	0.0941439	0.171027	0.0827796	0.617873
WBGene00013073	15.1318	0.0194303	0.13861	0.0815507	0.617873
WBGene00020592	73.406	-0.0610151	0.15242	0.0820184	0.617873
WBGene00020950	1686.69	-0.089196	0.168212	0.0816839	0.617873
WBGene00219447	10.0425	0.0196252	0.138617	0.082021	0.617873
WBGene00000618	6.55704	-0.025323	0.139709	0.0819938	0.617873
WBGene00018656	323.88	-0.0640343	0.154186	0.0820913	0.617873
WBGene00021044	63.9526	-0.0646818	0.154331	0.0812526	0.617873
WBGene00044283	33.5536	0.0344988	0.142081	0.0832075	0.617873
WBGene00194641	133.649	0.0892147	0.168175	0.0812519	0.617873
WBGene00001839	7.43036	-0.0234907	0.139376	0.0820204	0.617873
WBGene00001940	354.214	-0.0644618	0.154133	0.0822736	0.617873
WBGene00006779	169.166	0.0644245	0.154136	0.0832222	0.617873
WBGene00008197	1417.45	0.101116	0.175948	0.0818572	0.617873
WBGene00009589	80.1173	0.0391768	0.143615	0.0817854	0.617873
WBGene00010666	105.633	0.0866427	0.166715	0.0819204	0.617873
WBGene00013306	29.2151	0.0347132	0.142134	0.0826133	0.617873
WBGene00016053	3.49777	-0.0110204	0.137434	0.0831458	0.617873
WBGene00017120	10.1496	0.0334014	0.141776	0.0814842	0.617873
WBGene00021930	1346.65	-0.114039	0.181522	0.0811192	0.617873
WBGene00021935	24.5762	0.0580683	0.150907	0.0830394	0.617873
WBGene00044741	5.38911	-0.021191	0.138913	0.0813385	0.617873
WBGene00002066	5581.48	-0.0613175	0.152604	0.0827789	0.617873
WBGene00007064	14.7665	0.0245735	0.13959	0.0824224	0.617873
WBGene00013284	108.201	-0.0480303	0.146716	0.0815255	0.617873
WBGene00017182	33.8983	0.0233998	0.139331	0.0829414	0.617873
WBGene00017250	41.7768	-0.0453754	0.145614	0.0833131	0.617873
WBGene00017440	269.874	0.0935972	0.170959	0.0824396	0.617873
WBGene00022440	61.7095	0.0399572	0.143808	0.0816111	0.617873
WBGene00002232	29.3171	0.0399268	0.143741	0.0832054	0.617873
WBGene00008062	44.9598	0.0654304	0.154544	0.0829791	0.617873
WBGene00011388	209.302	-0.07412	0.15962	0.0813453	0.617873
WBGene00014870	3.2876	-0.0193893	0.138592	0.0825346	0.617873
WBGene00017978	14.0658	-0.00351108	0.136987	0.0832667	0.617873
WBGene00020348	481.311	-0.109501	0.17905	0.0833223	0.617873
WBGene00021237	60.1467	0.0436355	0.145075	0.0821146	0.617873
WBGene00021681	886.938	-0.0827886	0.16341	0.0816695	0.617873
WBGene00022027	903.905	-0.0895669	0.168738	0.0821598	0.617873
WBGene00044933	10.6267	0.0193526	0.138609	0.0832415	0.617873
WBGene00004212	15.6611	-0.0349146	0.142097	0.0818026	0.617873
WBGene00012127	71.5853	0.0371009	0.142875	0.0825638	0.617873
WBGene00011776	343.892	0.0943849	0.171142	0.0835052	0.618507
WBGene00010621	1086.42	-0.0896855	0.16747	0.0836371	0.618998
WBGene00020917	272.579	0.0465324	0.146158	0.0836696	0.618998
WBGene00235374	3.36672	0.0193082	0.138556	0.0837414	0.619167
WBGene00022814	9.07306	-0.0350318	0.142257	0.0839274	0.620179
WBGene00012452	61.4317	0.0662917	0.155018	0.0840422	0.620537
WBGene00021627	14.083	-0.00582694	0.137097	0.0840927	0.620537
WBGene00013602	5.56376	0.0273775	0.140189	0.0841231	0.620537
WBGene00013123	168.894	-0.092024	0.169479	0.084218	0.620874
WBGene00017058	12.4801	-0.00524874	0.137058	0.0844031	0.621876
WBGene00012584	1819.7	-0.0975084	0.176019	0.0844751	0.622044
WBGene00011397	7.61203	0.0308939	0.141027	0.0847818	0.62287
WBGene00003741	26.7568	0.0551171	0.149623	0.084923	0.62287
WBGene00019824	855.784	0.138776	0.185255	0.0850523	0.62287
WBGene00271791	4.85614	0.0152115	0.137956	0.0850592	0.62287
WBGene00004920	2039.67	0.0610696	0.151761	0.0850493	0.62287
WBGene00007992	4.27875	0.0194584	0.138617	0.0851108	0.62287
WBGene00021763	4102.87	-0.0795758	0.161639	0.0847625	0.62287
WBGene00000204	597.142	-0.0734943	0.158781	0.0851295	0.62287
WBGene00006389	172.844	0.0695301	0.156665	0.0847553	0.62287
WBGene00017647	29.4218	-0.0300617	0.140849	0.0850205	0.62287
WBGene00019333	1799.53	-0.102519	0.178556	0.0848694	0.62287
WBGene00009035	4656.6	-0.110179	0.18214	0.0852279	0.623229
WBGene00009274	14.6207	0.0351155	0.142182	0.0854842	0.624742
WBGene00004723	1046.99	-0.0879739	0.166817	0.0857176	0.626085
WBGene00013437	5.38619	-0.0250552	0.139651	0.0858197	0.626469
WBGene00010089	415.467	0.0960525	0.171425	0.0866354	0.627361
WBGene00010520	13.6717	0.0276651	0.140235	0.086566	0.627361
WBGene00003458	32.9914	-0.0050041	0.137046	0.0863222	0.627361
WBGene00011291	155.489	0.0768773	0.160664	0.0860183	0.627361
WBGene00016403	241.788	0.0354984	0.142358	0.0864013	0.627361
WBGene00018548	7.34423	-0.0186103	0.138422	0.0866369	0.627361
WBGene00000413	530.033	0.0895055	0.167977	0.0864854	0.627361
WBGene00000801	101.639	0.066439	0.154955	0.0865619	0.627361
WBGene00003229	3195.56	-0.0650577	0.155054	0.0866018	0.627361
WBGene00007159	15.5696	-0.00463263	0.137026	0.0861013	0.627361
WBGene00010612	5.23796	-0.0135684	0.137747	0.0865996	0.627361
WBGene00007131	8.20449	0.0220767	0.13902	0.0864074	0.627361
WBGene00008811	3.90056	-0.0132118	0.137674	0.0865738	0.627361
WBGene00015810	2766.79	-0.0930495	0.168856	0.086608	0.627361
WBGene00044236	168.515	0.0894466	0.167645	0.0867616	0.627903
WBGene00020466	671.785	0.0757169	0.159899	0.0868461	0.628155
WBGene00019262	5.83054	0.0188681	0.138457	0.0870093	0.628469
WBGene00044015	7.1477	-0.00475899	0.13704	0.0870627	0.628469
WBGene00010705	20.0687	0.0258222	0.13977	0.0871235	0.628469
WBGene00000763	158.086	0.079222	0.161728	0.0871022	0.628469
WBGene00017025	1175.4	-0.0747796	0.159668	0.0871381	0.628469
WBGene00015393	21.1457	0.0335386	0.141769	0.0872091	0.628622
WBGene00016823	708.954	0.0806057	0.162559	0.0874081	0.629339
WBGene00003755	64.1885	0.0362517	0.142556	0.0873669	0.629339
WBGene00045480	39.1089	0.0422777	0.144495	0.0877323	0.630954
WBGene00018045	334.099	-0.10405	0.17622	0.0877284	0.630954
WBGene00000064	9059.28	-0.0786936	0.16133	0.0883996	0.631737
WBGene00235159	17.5599	0.0216179	0.138983	0.0883856	0.631737
WBGene00001981	11.9182	0.0378844	0.142961	0.0879144	0.631737
WBGene00018885	43.2837	-0.0419135	0.1443	0.0883848	0.631737
WBGene00022615	47.1127	-0.0291406	0.140572	0.0881098	0.631737
WBGene00020084	7.09467	-0.0199066	0.138648	0.0884046	0.631737
WBGene00001832	995.329	-0.091666	0.168884	0.0884912	0.631737
WBGene00003803	1622.25	0.104159	0.178176	0.0879502	0.631737
WBGene00009477	5010.7	-0.0707583	0.157076	0.0883404	0.631737
WBGene00014510	6.33593	0.0131862	0.137718	0.0884527	0.631737
WBGene00016463	3.69163	-0.0203678	0.138748	0.0883575	0.631737
WBGene00019322	14296.8	-0.0614668	0.152406	0.0882134	0.631737
WBGene00011400	7.70401	0.0256543	0.13975	0.088441	0.631737
WBGene00002111	36.7573	0.0299982	0.14082	0.0886419	0.632456
WBGene00018398	161.359	0.035652	0.142375	0.0888224	0.632862
WBGene00271701	3.52401	0.0169227	0.138178	0.0888491	0.632862
WBGene00195011	7.7182	0.0273337	0.140114	0.0887623	0.632862
WBGene00011195	2487.91	-0.0686776	0.155712	0.0889787	0.633428
WBGene00009518	22.277	0.0380704	0.143072	0.0890555	0.633618
WBGene00015476	66.3282	0.0363246	0.142565	0.089236	0.634251
WBGene00020884	11.568	0.038007	0.143023	0.0892951	0.634251
WBGene00021354	59.2143	0.0597057	0.151554	0.0892923	0.634251
WBGene00007939	35.1995	0.0472496	0.146166	0.0893667	0.634403
WBGene00011463	6.21323	0.020435	0.138722	0.0895238	0.634408
WBGene00006699	2325.75	-0.0788874	0.160408	0.089506	0.634408
WBGene00007707	1257.57	0.118638	0.180244	0.0895682	0.634408
WBGene00022042	10519.9	-0.0909769	0.167984	0.0894244	0.634408
WBGene00219942	338.953	0.0201242	0.138732	0.0896675	0.634755
WBGene00013832	3.28816	-0.0139011	0.137802	0.0898927	0.634927
WBGene00022929	9.6496	0.0256336	0.139757	0.0898626	0.634927
WBGene00000370	83.4629	0.0718033	0.157403	0.0898779	0.634927
WBGene00003148	1462.81	-0.104934	0.176169	0.0897559	0.634927
WBGene00004959	44.5044	0.0679309	0.155466	0.0899801	0.635189
WBGene00010115	63.5306	0.0326986	0.141481	0.0901169	0.6358
WBGene00013650	17.3664	0.0365818	0.142535	0.0903344	0.636707
WBGene00011870	127.661	0.0392197	0.143432	0.0903463	0.636707
WBGene00006573	1317.17	-0.075963	0.159655	0.090546	0.637759
WBGene00018957	252.823	-0.0917757	0.168356	0.0907042	0.638517
WBGene00014103	20.7656	0.0486301	0.146717	0.090793	0.638786
WBGene00012871	12.4866	-0.00348747	0.136986	0.0910449	0.640202
WBGene00304202	57.7163	0.0322649	0.141368	0.0911515	0.640595
WBGene00018346	6.89397	0.0278991	0.140137	0.0912368	0.640838
WBGene00018121	12.4128	-0.00350925	0.136987	0.0914519	0.641757
WBGene00008432	31.6429	0.0298235	0.140727	0.0914692	0.641757
WBGene00003914	1130.67	-0.0957594	0.16695	0.0917266	0.642493
WBGene00045370	38.2718	0.0286463	0.140447	0.0916886	0.642493
WBGene00012559	132.01	0.054255	0.149045	0.0916997	0.642493
WBGene00013735	519.772	-0.0902234	0.167373	0.0918591	0.643065
WBGene00012698	87.1869	0.0496347	0.147086	0.0921236	0.644202
WBGene00022573	5.58066	0.0245755	0.139474	0.0921234	0.644202
WBGene00008081	675.573	-0.107428	0.175447	0.0922186	0.64451
WBGene00007911	14.8236	0.041329	0.144039	0.0923393	0.644997
WBGene00004337	7177.62	-0.0703735	0.156557	0.0928673	0.645474
WBGene00007536	51.6493	0.0535062	0.148648	0.0928137	0.645474
WBGene00020662	4015.75	0.0676647	0.155365	0.0925778	0.645474
WBGene00000075	64.9227	-0.0574166	0.150398	0.0928639	0.645474
WBGene00011012	226.106	-0.087586	0.165957	0.0927838	0.645474
WBGene00003831	913.949	-0.111322	0.176676	0.0928177	0.645474
WBGene00020377	12.3549	-0.0243255	0.139406	0.0925017	0.645474
WBGene00011559	374.526	-0.105287	0.174822	0.0925748	0.645474
WBGene00017272	405.906	0.0984283	0.171232	0.0928217	0.645474
WBGene00010063	72.7701	-0.0424665	0.144422	0.0930652	0.646494
WBGene00012700	75.3623	0.052401	0.148214	0.0931756	0.646905
WBGene00000816	385.334	0.101832	0.173198	0.0933458	0.64702
WBGene00010623	43.238	0.0594376	0.151146	0.0933062	0.64702
WBGene00012551	1176.7	-0.102139	0.172434	0.0933306	0.64702
WBGene00007315	557.373	0.0555032	0.149586	0.0934544	0.647418
WBGene00011794	6.67251	0.0238311	0.139281	0.0935777	0.647916
WBGene00003368	56.2414	-0.0600248	0.15177	0.0939918	0.648983
WBGene00012784	20.8492	-0.0330045	0.141487	0.0938352	0.648983
WBGene00017920	2295.29	-0.0952942	0.171819	0.0939841	0.648983
WBGene00018647	30.2847	0.0374011	0.142793	0.0940399	0.648983
WBGene00219917	3.86871	0.016932	0.138195	0.093802	0.648983
WBGene00002249	800.765	-0.0982568	0.170893	0.093964	0.648983
WBGene00009536	4.18728	0.0128123	0.137663	0.0941508	0.64904
WBGene00000088	49.9285	0.0623832	0.152529	0.0941357	0.64904
WBGene00001500	6.21233	-0.0229689	0.139074	0.0943385	0.649979
WBGene00045194	7.72552	0.0108487	0.137456	0.094668	0.651893
WBGene00019998	72.0575	0.0656675	0.15421	0.0947557	0.652142
WBGene00008304	5.62764	-0.0197235	0.138644	0.0949746	0.652222
WBGene00017241	281.508	0.0664185	0.154553	0.0949142	0.652222
WBGene00010149	71.573	0.065188	0.153758	0.0949268	0.652222
WBGene00019255	3.36647	-0.0162368	0.138098	0.0949642	0.652222
WBGene00009649	33.588	0.0501367	0.147224	0.0950254	0.652222
WBGene00015922	105.945	-0.0797642	0.161084	0.0952059	0.652564
WBGene00021984	22.9833	0.0357099	0.142244	0.0952024	0.652564
WBGene00011969	531.93	0.0860812	0.164512	0.0952301	0.652564
WBGene00194908	121.033	0.0538999	0.148784	0.0952945	0.652651
WBGene00016200	1178.39	-0.0790718	0.161741	0.0955476	0.65403
WBGene00044500	41.3012	0.0688344	0.155521	0.09598	0.656634
WBGene00019203	136.088	0.050095	0.147217	0.0961703	0.657224
WBGene00010807	865.954	0.131199	0.18904	0.0961617	0.657224
WBGene00016048	233.477	0.050711	0.147477	0.0963379	0.65734
WBGene00016653	2029.67	-0.11091	0.174342	0.0963433	0.65734
WBGene00021689	203.319	-0.0860689	0.164557	0.0962449	0.65734
WBGene00001876	25.4611	-0.0260826	0.13984	0.0965682	0.657809
WBGene00012672	427.083	-0.0826675	0.162614	0.0965353	0.657809
WBGene00016585	29.1782	0.049302	0.146798	0.0965164	0.657809
WBGene00195209	22.3602	0.0380399	0.142938	0.096684	0.65814
WBGene00015064	176.862	-0.102776	0.172275	0.0967209	0.65814
WBGene00004173	76.5578	0.0388503	0.143216	0.0973555	0.658937
WBGene00022410	44.9959	-0.0468469	0.145953	0.0972493	0.658937
WBGene00019871	233.663	-0.0803286	0.16173	0.0973835	0.658937
WBGene00001390	258.271	0.0649778	0.153712	0.0971742	0.658937
WBGene00017926	3696.96	-0.0790905	0.160673	0.097237	0.658937
WBGene00012906	24.7319	0.032416	0.141231	0.0969028	0.658937
WBGene00013148	6.55519	-0.0154207	0.137945	0.0971543	0.658937
WBGene00271819	11.5231	-0.0050069	0.13704	0.0973206	0.658937
WBGene00013204	407.893	0.0977012	0.170485	0.0969743	0.658937
WBGene00000231	692.48	-0.0461172	0.145692	0.0972598	0.658937
WBGene00003401	965.28	-0.0950538	0.166794	0.0974117	0.658937
WBGene00004479	43996.2	-0.0712907	0.156644	0.0976993	0.6604
WBGene00045190	4.16375	0.0239362	0.13936	0.0977325	0.6604
WBGene00004151	213.975	-0.0713363	0.156656	0.0981972	0.661519
WBGene00011932	107.901	0.0650069	0.15355	0.0985088	0.661519
WBGene00020695	501.37	-0.0943773	0.167637	0.0980798	0.661519
WBGene00021079	65.6749	0.0497244	0.147001	0.0984118	0.661519
WBGene00206524	4.51205	0.0230933	0.139198	0.0988358	0.661519
WBGene00003957	32.6554	0.0503432	0.147144	0.0987422	0.661519
WBGene00017070	733.78	-0.0872292	0.163877	0.0988405	0.661519
WBGene00002076	1734.58	-0.0917272	0.167154	0.0986374	0.661519
WBGene00013093	219.825	-0.0608812	0.152019	0.0983574	0.661519
WBGene00014210	9.65036	0.0336259	0.141633	0.0987432	0.661519
WBGene00019605	23.5592	0.0439569	0.144812	0.0985741	0.661519
WBGene00008566	4.62268	-0.0249251	0.139576	0.0980967	0.661519
WBGene00017675	3373.88	-0.0654426	0.153786	0.0985997	0.661519
WBGene00011115	1775.85	0.0699216	0.156083	0.098821	0.661519
WBGene00012962	3.45009	0.0163701	0.138096	0.0987662	0.661519
WBGene00269391	4.28741	0.0225443	0.139055	0.098158	0.661519
WBGene00284846	44.905	0.0404264	0.143668	0.0986727	0.661519
WBGene00010964	20721.6	0.100692	0.171495	0.0980807	0.661519
WBGene00002123	4.19479	-0.0228359	0.139186	0.0991629	0.662274
WBGene00219876	5425.95	0.0225849	0.139136	0.099158	0.662274
WBGene00001336	775.838	-0.124348	0.174259	0.0990407	0.662274
WBGene00006773	986.243	0.0880884	0.165071	0.0991492	0.662274
WBGene00022707	11.0735	-0.00347552	0.136986	0.0994755	0.664011
WBGene00018399	150.891	0.104629	0.172251	0.0996674	0.66459
WBGene00008272	4.08909	-0.0176094	0.138267	0.0996521	0.66459
WBGene00010351	8210.59	-0.0730337	0.157377	0.0997565	0.664833
WBGene00012692	2319.71	-0.0710056	0.156522	0.100181	0.665081
WBGene00021979	8.7294	-0.0273237	0.140032	0.100443	0.665081
WBGene00000216	3771.8	0.065756	0.153973	0.100402	0.665081
WBGene00001687	7.69147	0.0180338	0.138327	0.100483	0.665081
WBGene00015471	35.5494	0.0372188	0.14266	0.100491	0.665081
WBGene00020160	25.1242	-0.0490674	0.146754	0.100531	0.665081
WBGene00018328	116.262	0.0807853	0.161258	0.0999607	0.665081
WBGene00044007	181.863	0.0649948	0.15362	0.0999774	0.665081
WBGene00003221	757.717	0.0667483	0.154377	0.100151	0.665081
WBGene00014150	78.7082	0.07269	0.157016	0.100239	0.665081
WBGene00019993	389.58	0.107283	0.173256	0.0999169	0.665081
WBGene00196235	3.92524	0.0167116	0.138142	0.100172	0.665081
WBGene00000268	779.375	-0.0868238	0.164091	0.100089	0.665081
WBGene00013037	39.2146	0.045167	0.14526	0.100413	0.665081
WBGene00006945	101.619	0.0689521	0.15531	0.100664	0.665265
WBGene00021515	302.103	-0.0717629	0.156743	0.100649	0.665265
WBGene00219415	4.21683	0.0201922	0.138599	0.100845	0.665767
WBGene00016485	351.294	-0.105112	0.172844	0.100797	0.665767
WBGene00009659	193.891	-0.0876112	0.164556	0.100998	0.666083
WBGene00020762	1788.14	-0.0637531	0.152873	0.100948	0.666083
WBGene00002196	1523.74	-0.0977778	0.168798	0.101349	0.668045
WBGene00001834	971.834	-0.0837357	0.162486	0.101694	0.6689
WBGene00006635	16.1896	0.0260647	0.139742	0.101717	0.6689
WBGene00018332	3.61733	-0.0159671	0.138055	0.101587	0.6689
WBGene00021897	3.86166	0.0225636	0.139024	0.101735	0.6689
WBGene00020599	36.1588	0.0302497	0.140768	0.101743	0.6689
WBGene00013164	13.6741	0.0282493	0.140149	0.10188	0.669453
WBGene00003797	910.644	-0.0628248	0.153264	0.101934	0.66946
WBGene00008596	9.74363	0.0339185	0.141654	0.102121	0.670192
WBGene00001168	51084.9	-0.0766885	0.158948	0.102152	0.670192
WBGene00045195	13.8777	0.0274415	0.140098	0.102346	0.671115
WBGene00000603	15.119	-0.0214122	0.138859	0.102642	0.671316
WBGene00022379	30.4563	0.0253916	0.13964	0.102497	0.671316
WBGene00006918	1822.89	-0.0878048	0.162459	0.102597	0.671316
WBGene00017979	74.8395	0.0657882	0.153844	0.10245	0.671316
WBGene00001946	3328.59	-0.10403	0.174065	0.102585	0.671316
WBGene00003474	9818.65	0.0571222	0.149743	0.103035	0.671511
WBGene00013962	4.66371	0.0201912	0.138646	0.103454	0.671511
WBGene00017471	21.1038	0.0439777	0.144762	0.103107	0.671511
WBGene00010745	11.9825	-0.0272971	0.14	0.103299	0.671511
WBGene00021365	466.561	-0.108105	0.172418	0.103184	0.671511
WBGene00044757	47.0762	0.0388184	0.143122	0.10327	0.671511
WBGene00002266	58.7307	-0.0501872	0.147047	0.103469	0.671511
WBGene00010681	343.111	0.0584716	0.150405	0.103215	0.671511
WBGene00016003	20.7414	0.0283432	0.140231	0.102927	0.671511
WBGene00195143	13.353	0.0304524	0.140737	0.102854	0.671511
WBGene00004043	1075.82	-0.0750031	0.158038	0.103451	0.671511
WBGene00006726	558.375	0.0608172	0.151559	0.103209	0.671511
WBGene00018582	15.3939	0.0382877	0.142895	0.102876	0.671511
WBGene00194703	10.4995	-0.00349956	0.136987	0.103432	0.671511
WBGene00003589	202.912	0.081326	0.161328	0.102918	0.671511
WBGene00000723	18.2888	-0.0314166	0.140984	0.103594	0.671634
WBGene00011273	4946.71	-0.0694142	0.154384	0.103552	0.671634
WBGene00000620	11.3735	-0.0373704	0.142591	0.104312	0.67215
WBGene00012634	95.921	0.0455071	0.145365	0.103937	0.67215
WBGene00020948	1612.65	-0.0739773	0.157509	0.104289	0.67215
WBGene00015946	28.9307	0.0330797	0.141464	0.103828	0.67215
WBGene00017703	23.1018	-0.0281385	0.140188	0.10423	0.67215
WBGene00017088	2833.48	-0.0778431	0.159374	0.104149	0.67215
WBGene00021547	61.062	0.0594874	0.150892	0.103852	0.67215
WBGene00022455	699.265	0.0957262	0.167644	0.104291	0.67215
WBGene00044289	4.64591	0.0172503	0.138176	0.104007	0.67215
WBGene00007320	10.4029	-0.0034986	0.136986	0.1041	0.67215
WBGene00015267	328.439	-0.088683	0.164833	0.104062	0.67215
WBGene00020104	26.2653	-0.0442901	0.144859	0.103798	0.67215
WBGene00007702	51.9923	-0.0622531	0.151724	0.104433	0.672588
WBGene00019744	123.653	0.0495695	0.146782	0.104692	0.673228
WBGene00002210	46.1782	0.0407065	0.143784	0.104594	0.673228
WBGene00000678	14.2557	-0.0192723	0.138486	0.104665	0.673228
WBGene00000599	34.595	-0.0205706	0.13864	0.104878	0.673392
WBGene00001853	513.042	-0.09069	0.16521	0.104811	0.673392
WBGene00001337	1768	-0.115845	0.171448	0.104826	0.673392
WBGene00000868	4245.87	-0.0966225	0.167921	0.104978	0.673695
WBGene00017017	1417.6	0.0774464	0.160568	0.105068	0.673752
WBGene00045390	11.8536	0.0370023	0.142447	0.105241	0.673752
WBGene00008605	7.14331	-0.0220714	0.138974	0.10536	0.673752
WBGene00168759	6.28708	0.021609	0.138893	0.105335	0.673752
WBGene00020482	29.6748	0.0456841	0.14521	0.105226	0.673752
WBGene00017756	181.582	0.0502875	0.147064	0.105226	0.673752
WBGene00044341	334.394	0.0695233	0.155297	0.105309	0.673752
WBGene00001999	2245.28	-0.0826356	0.161479	0.105472	0.674061
WBGene00004409	57539.4	-0.0625499	0.152054	0.105515	0.674061
WBGene00014672	3.40424	-0.0157727	0.137861	0.105667	0.674186
WBGene00021597	395.494	-0.0857778	0.163087	0.105695	0.674186
WBGene00010962	60060.1	0.0629889	0.152428	0.105589	0.674186
WBGene00015366	5.12534	-0.0174993	0.138219	0.10622	0.674843
WBGene00022015	557.307	-0.0854234	0.162727	0.106352	0.674843
WBGene00219308	26.5826	0.0414859	0.143873	0.106454	0.674843
WBGene00016848	50.8987	0.055109	0.14884	0.106083	0.674843
WBGene00022706	49.8077	-0.0255516	0.139657	0.106244	0.674843
WBGene00185076	7.01487	0.0210547	0.138803	0.106492	0.674843
WBGene00007352	5437.79	-0.101671	0.171518	0.106131	0.674843
WBGene00013211	187.475	0.0614892	0.151634	0.106014	0.674843
WBGene00194851	44.8758	0.0353066	0.142057	0.105975	0.674843
WBGene00007254	18.4351	0.0384953	0.142932	0.10606	0.674843
WBGene00021027	23.0284	0.0404661	0.143571	0.106418	0.674843
WBGene00021351	2246.23	-0.0740935	0.154552	0.106434	0.674843
WBGene00013225	170.113	0.063195	0.152377	0.106125	0.674843
WBGene00009082	780.468	-0.1061	0.176399	0.106577	0.675041
WBGene00044990	7.96034	0.0316144	0.141016	0.106707	0.675524
WBGene00017386	37.3856	-0.0111238	0.137468	0.106969	0.676167
WBGene00002025	868.922	-0.066582	0.153673	0.106954	0.676167
WBGene00012646	377.403	-0.0883648	0.163571	0.106967	0.676167
[truncated: 13,716 more rows]

## Sheet: padj<0.05 (B)
Wormbase ID	baseMean	log2FoldChange	lfcSE	p value	Adjusted p value
WBGene00001399	189.561	-11.9435	3.20808	5.93e-16	3.75e-12
WBGene00001387	149.146	-4.50697	1.0731	5.37e-06	0.00157689
WBGene00003467	42.2743	-4.09714	1.16268	9.92e-06	0.00250709
WBGene00009221	41.1635	-2.4117	0.62028	3.07e-06	0.0009948
WBGene00007892	90.4806	-2.36887	0.713121	4.98e-05	0.00774992
WBGene00000733	6226.9	-2.26532	0.667794	2.26e-05	0.00449691
WBGene00021818	154.666	-2.04986	0.470643	6.42e-07	0.00030044
WBGene00000698	7641.88	-1.77246	0.789203	0.00060261	0.0447919
WBGene00012867	132.072	-1.70446	0.423702	2.42e-06	0.00082587
WBGene00000656	4967.38	-1.60459	0.639628	0.00034273	0.0300748
WBGene00009787	637.018	-1.56121	0.489291	5.14e-05	0.00782104
WBGene00018099	261.057	-1.52469	0.492638	7.13e-05	0.0102349
WBGene00003246	297.434	-1.50735	0.456943	3.9e-05	0.00680673
WBGene00001694	647.921	-1.47281	0.523063	0.00016117	0.0188777
WBGene00004196	117.238	-1.39421	0.482417	0.00014008	0.01702
WBGene00021296	248.266	-1.10335	0.408518	0.00024728	0.0252297
WBGene00000757	5773.52	-1.09946	0.45167	0.00047323	0.0385792
WBGene00000696	10011.5	-1.06646	0.387452	0.00020525	0.0221669
WBGene00001713	91.332	-0.116962	0.225733	0.00029192	0.0278522
WBGene00000732	614.221	-0.115719	0.229335	3.42e-08	2.7e-05
WBGene00021779	74.0899	-0.10017	0.199793	2.4e-05	0.00466099
WBGene00015355	47.2215	-0.0980582	0.194237	0.00048337	0.0391191
WBGene00000668	3880.95	-0.0978416	0.194406	0.00051803	0.0406483
WBGene00019540	2652.98	-0.0965621	0.193621	0.0001381	0.0169421
WBGene00008629	25.9911	-0.0844002	0.179319	3.57e-05	0.00645009
WBGene00001702	39.3779	-0.0730175	0.167624	8.84e-05	0.0121476
WBGene00000715	1944.89	-0.072377	0.167409	8.78e-06	0.00236091
WBGene00007875	44.8337	-0.0716525	0.166432	3.47e-05	0.00636081
WBGene00016659	32.8782	-0.0657709	0.161071	0.00037077	0.0320897
WBGene00008955	10.7494	-0.0632555	0.158749	0.00040231	0.0338909
WBGene00013474	18.3213	-0.0629103	0.159317	4.43e-05	0.00718285
WBGene00000256	66.721	-0.0619493	0.158879	3.46e-06	0.00109349
WBGene00003463	56.2427	-0.0612206	0.158353	2.34e-06	0.00082437
WBGene00003429	64.1109	-0.058706	0.156454	5.52e-06	0.0015864
WBGene00003457	33.299	-0.0579865	0.155926	9.23e-06	0.00238479
WBGene00003470	41.0987	-0.0578165	0.155908	2.23e-06	0.00082437
WBGene00019586	24.4277	-0.057383	0.15517	0.00031688	0.0291683
WBGene00007307	37.7813	-0.0525774	0.152499	3.72e-06	0.00114708
WBGene00021993	18.0773	-0.0490953	0.15033	1.8e-05	0.00393984
WBGene00011214	30.895	-0.0484687	0.150064	1.23e-05	0.00299185
WBGene00003443	39.6569	-0.0473819	0.149372	2.28e-05	0.00449691
WBGene00010563	21.0657	-0.0473317	0.149188	0.00030766	0.028586
WBGene00004904	13.09	-0.0464506	0.148747	0.00029034	0.0278522
WBGene00012595	37.2698	-0.0456424	0.148566	1.36e-06	0.000571
WBGene00003469	17.9383	-0.0446769	0.147826	0.00021687	0.0232239
WBGene00016447	68.8481	-0.0446689	0.147835	0.00017329	0.0194298
WBGene00000703	1199.87	-0.0445615	0.148045	3.11e-07	0.00017074
WBGene00016440	20.6212	-0.0435088	0.147207	0.00029316	0.0278522
WBGene00003424	21.8156	-0.0422654	0.146701	0.00013427	0.0167986
WBGene00000712	1682.21	-0.0415585	0.146543	1.95e-07	0.00011946
WBGene00016322	33.2274	-0.0405356	0.145767	0.00067769	0.049452
WBGene00000657	1289.26	-0.0403552	0.145995	4.74e-07	0.0002497
WBGene00020860	25.6452	-0.0401495	0.145722	0.00014805	0.0178164
WBGene00007601	23.0201	-0.0388671	0.145099	0.00044141	0.0366948
WBGene00000606	22.397	-0.0385458	0.145062	5e-05	0.00774992
WBGene00000649	43.6593	-0.038432	0.145067	9.25e-06	0.00238479
WBGene00015024	27.7884	-0.0373	0.144564	4.25e-05	0.00716827
WBGene00021381	14.8433	-0.0365781	0.144129	0.00059016	0.0441259
WBGene00015688	20.3975	-0.0354232	0.143749	0.00028617	0.0278522
WBGene00005016	21.0038	-0.0352999	0.143756	5.36e-05	0.00805812
WBGene00004398	19.2379	-0.0330431	0.142828	0.00015039	0.0179277
WBGene00009581	25.7318	-0.0322956	0.142592	0.00022577	0.0237738
WBGene00005012	11.0032	-0.0296833	0.141596	0.00070276	0.0504549
WBGene00022090	9.00673	-0.0281938	0.141192	0.00032496	0.02933
WBGene00010486	13.4855	-0.0279578	0.141143	0.00043661	0.0365366
WBGene00000753	22.9655	-0.0275496	0.141037	0.00011384	0.0148302
WBGene00021207	13.2827	-0.0271006	0.140851	0.00068393	0.049452
WBGene00021996	127.731	-0.0265558	0.140796	8.38e-06	0.00230284
WBGene00011114	12.2154	-0.0252034	0.140351	0.00022427	0.0237738
WBGene00194787	8.3218	-0.0247375	0.140194	0.0006356	0.0469671
WBGene00016054	48.8974	-0.0180375	0.138693	0.00013681	0.0169421
WBGene00000719	42.8402	-0.0032916	0.13698	7.08e-08	4.71e-05
WBGene00194997	21.3462	0.0618187	0.157874	0.00067142	0.0493261
WBGene00044292	94.8392	0.148047	0.321535	1.59e-06	0.00060807
WBGene00011144	365.328	0.919216	0.376958	0.00050046	0.0400242
WBGene00017293	1024.45	1.03616	0.387385	0.0002665	0.0269397
WBGene00011434	402.539	1.04824	0.399125	0.00030309	0.0285807
WBGene00007303	201.414	1.13737	0.471161	0.00052113	0.0406483
WBGene00012201	101.841	1.20472	0.373363	4.63e-05	0.00740508
WBGene00007362	143.885	1.25822	0.491991	0.00033183	0.029528
WBGene00011059	1758.95	1.26582	0.437268	0.00013351	0.0167986
WBGene00018384	48.1603	1.31701	0.53338	0.00037892	0.0325716
WBGene00006986	44.8732	1.31969	0.590504	0.00068488	0.049452
WBGene00002259	130.342	1.32725	0.533221	0.00039526	0.0337112
WBGene00009215	693.849	1.34076	0.55885	0.00048605	0.0391191
WBGene00016745	93.112	1.40532	0.418307	3.16e-05	0.00586425
WBGene00009902	284.029	1.40889	0.542336	0.00029276	0.0278522
WBGene00013035	179.087	1.43491	0.612569	0.0005331	0.0410749
WBGene00010597	5082.34	1.47691	0.643744	0.00057506	0.043512
WBGene00004989	388.28	1.53124	0.489447	6.29e-05	0.00924882
WBGene00009192	257.188	1.54821	0.442702	1.84e-05	0.00393984
WBGene00012139	180.995	1.55197	0.48321	5.03e-05	0.00774992
WBGene00021662	75.3719	1.58801	0.673034	0.00051304	0.0406103
WBGene00010212	170.358	1.62571	0.693049	0.00054458	0.0417046
WBGene00022887	80.679	1.64535	0.667364	0.00039751	0.0337112
WBGene00017105	189.675	1.68591	0.368875	1.99e-07	0.00011946
WBGene00017964	317.157	1.69254	0.705454	0.00045702	0.0377449
WBGene00011364	55.5957	1.70971	0.747909	0.00055271	0.0420728
WBGene00011330	216.324	1.71605	0.61682	0.00016741	0.0194076
WBGene00001938	64.6825	1.74148	0.544836	4.38e-05	0.00718285
WBGene00017093	25.4235	1.75669	0.645217	0.00019125	0.021014
WBGene00010769	379.46	1.79966	0.681622	0.00024758	0.0252297
WBGene00009397	120.511	1.84717	0.497961	7.34e-06	0.00205968
WBGene00021335	101.583	1.87818	0.680111	0.00017124	0.0194298
WBGene00021055	26.8574	1.89192	0.641408	0.00011263	0.0148243
WBGene00017103	29.1765	1.94684	0.670181	0.00012046	0.0153751
WBGene00000298	386.768	2.03305	0.581888	1.64e-05	0.00376637
WBGene00022564	101.717	2.04169	0.605406	2.5e-05	0.00478097
WBGene00077757	58.5625	2.10385	0.839309	0.00029195	0.0278522
WBGene00017498	111.997	2.18424	0.679803	4.37e-05	0.00718285
WBGene00016052	144.891	2.18625	0.644664	2.21e-05	0.00449691
WBGene00004055	134.936	2.21933	0.461421	5.51e-08	3.87e-05
WBGene00302993	42.3201	2.22074	0.802568	0.00017376	0.0194298
WBGene00008358	90.8845	2.29296	0.894926	0.00028259	0.0278522
WBGene00004057	100.44	2.32757	0.796971	0.00011113	0.0147809
WBGene00012910	24.466	2.33447	0.926091	0.00028761	0.0278522
WBGene00044472	285.823	2.39156	1.03646	0.00051422	0.0406103
WBGene00004056	69.6163	2.4578	0.475082	9.55e-09	9.28e-06
WBGene00284858	1994.51	2.49411	0.953652	0.00023902	0.0247561
WBGene00219748	15.2166	2.52033	0.850642	0.00010435	0.0141778
WBGene00008577	23.6767	2.53695	1.07129	0.00047156	0.0385792
WBGene00007283	286.252	2.54561	0.588578	5.74e-07	0.00027888
WBGene00000368	84.1916	2.55152	0.978081	0.00023314	0.0243469
WBGene00194985	11.8964	2.56988	1.14605	0.00058755	0.0441259
WBGene00194926	17.0499	2.62934	1.08162	0.0003381	0.0298756
WBGene00019368	20.8568	2.70971	0.744394	1.02e-05	0.00252883
WBGene00220238	67.1581	2.71287	1.18666	0.0005266	0.0408231
WBGene00021581	28.8323	2.86856	0.722529	2.35e-06	0.00082437
WBGene00000708	5747.03	2.90624	0.53482	2.47e-09	2.6e-06
WBGene00044183	10.1298	3.02944	1.06488	0.00019417	0.0211515
WBGene00220198	35.2595	3.0734	1.29702	0.00032086	0.0291683
WBGene00008681	31.1102	3.10168	1.02994	8.54e-05	0.0118612
WBGene00009903	17.672	3.15681	1.09357	0.00010588	0.0142331
WBGene00045117	9.07951	3.26272	1.28885	0.00036447	0.0317614
WBGene00194821	20.5622	3.30012	1.25433	0.0001877	0.0208056
WBGene00018903	41.4157	3.31249	0.559943	1.75e-10	2.76e-07
WBGene00002090	85.027	3.3939	0.811918	1.05e-06	0.00045949
WBGene00044811	90.8582	3.44241	0.619133	9.52e-10	1.09e-06
WBGene00018971	12.7382	3.45409	1.22948	0.00011711	0.0150996
WBGene00045208	62.7872	3.46944	0.846556	1.57e-06	0.00060807
WBGene00000986	45.5912	3.48824	1.01744	2.26e-05	0.00449691
WBGene00009522	13.9061	3.49131	1.15274	6.4e-05	0.00929605
WBGene00003094	108.69	3.52394	0.892037	2.61e-06	0.0008666
WBGene00013101	8.85123	3.52652	1.07505	4.01e-05	0.00685289
WBGene00022040	40.7601	3.53609	1.18307	7.86e-05	0.0110404
WBGene00001677	17.8391	3.60856	0.967942	4.65e-06	0.00139837
WBGene00019029	44.9033	3.62026	0.78148	5.45e-08	3.87e-05
WBGene00045171	830.549	3.63864	1.36012	0.00017103	0.0194298
WBGene00045132	3942.38	3.72447	0.856863	5.05e-07	0.00025538
WBGene00015052	195.652	3.82079	1.4267	0.00016135	0.0188777
WBGene00044723	13.4862	3.93295	1.17343	2.1e-05	0.00442954
WBGene00021772	15.6921	3.93905	0.934122	7.73e-07	0.00034895
WBGene00021582	6.53167	3.97274	1.52421	0.00030767	0.028586
WBGene00044974	39.7295	3.98045	1.32112	7.81e-05	0.0110404
WBGene00004622	1.31376e+06	3.98115	1.29309	5.87e-05	0.00872508
WBGene00019105	152.397	4.17475	0.818611	1.06e-08	9.58e-06
WBGene00006418	156.195	4.29304	0.464291	5.46e-22	6.9e-18
WBGene00021072	6.51591	4.37255	1.66582	0.00033142	0.029528
WBGene00010005	1090.85	4.37486	1.28764	1.8e-05	0.00393984
WBGene00000213	13.844	4.43906	1.2298	1.47e-05	0.00349835
WBGene00004987	288.186	4.44969	0.638513	1.2e-13	3.04e-10
WBGene00008323	11.9644	4.46829	0.976984	2.78e-07	0.00015958
WBGene00023069	6105.3	4.5283	1.37532	2.66e-05	0.00501568
WBGene00044471	195.769	4.62004	0.790045	5.53e-10	6.99e-07
WBGene00020900	9.44248	5.09486	1.4324	1.83e-05	0.00393984
WBGene00016670	15.9629	5.16233	1.55035	3.93e-05	0.00680673
WBGene00016833	13.5313	5.22297	2.14514	0.00032038	0.0291683
WBGene00013900	11.454	5.27146	1.59311	3.9e-05	0.00680673
WBGene00020016	13.3508	5.55378	1.54436	1.54e-05	0.00359832
WBGene00018731	2006.92	5.55853	0.848967	2.62e-12	5.52e-09
WBGene00010062	43.7876	5.97276	1.02068	2.3e-10	3.23e-07
WBGene00015152	99.5839	7.4489	1.01348	9.8e-15	3.1e-11
WBGene00077616	33.0309	8.16208	1.6932	1.79e-08	1.51e-05
WBGene00005327	9.44085	8.3828	2.96108	1.42e-06	0.00058023
WBGene00011150	86.7894	9.99842	1.4442	4.28e-15	1.8e-11
WBGene00013939	32.5659	10.1069	2.84112	4.07e-11	7.35e-08

## Sheet: Down (C)
Wormbase ID	baseMean	log2FoldChange	lfcSE	p value	Adjusted p value
WBGene00001399	189.561	-11.9435	3.20808	5.93e-16	3.75e-12
WBGene00000732	614.221	-0.115719	0.229335	3.42e-08	2.7e-05
WBGene00000719	42.8402	-0.0032916	0.13698	7.08e-08	4.71e-05
WBGene00000712	1682.21	-0.0415585	0.146543	1.95e-07	0.00011946
WBGene00000703	1199.87	-0.0445615	0.148045	3.11e-07	0.00017074
WBGene00000657	1289.26	-0.0403552	0.145995	4.74e-07	0.0002497
WBGene00021818	154.666	-2.04986	0.470643	6.42e-07	0.00030044
WBGene00012595	37.2698	-0.0456424	0.148566	1.36e-06	0.000571
WBGene00003463	56.2427	-0.0612206	0.158353	2.34e-06	0.00082437
WBGene00003470	41.0987	-0.0578165	0.155908	2.23e-06	0.00082437
WBGene00012867	132.072	-1.70446	0.423702	2.42e-06	0.00082587
WBGene00009221	41.1635	-2.4117	0.62028	3.07e-06	0.0009948
WBGene00000256	66.721	-0.0619493	0.158879	3.46e-06	0.00109349
WBGene00007307	37.7813	-0.0525774	0.152499	3.72e-06	0.00114708
WBGene00001387	149.146	-4.50697	1.0731	5.37e-06	0.00157689
WBGene00003429	64.1109	-0.058706	0.156454	5.52e-06	0.0015864
WBGene00021996	127.731	-0.0265558	0.140796	8.38e-06	0.00230284
WBGene00000715	1944.89	-0.072377	0.167409	8.78e-06	0.00236091
WBGene00003457	33.299	-0.0579865	0.155926	9.23e-06	0.00238479
WBGene00000649	43.6593	-0.038432	0.145067	9.25e-06	0.00238479
WBGene00003467	42.2743	-4.09714	1.16268	9.92e-06	0.00250709
WBGene00011214	30.895	-0.0484687	0.150064	1.23e-05	0.00299185
WBGene00021993	18.0773	-0.0490953	0.15033	1.8e-05	0.00393984
WBGene00000733	6226.9	-2.26532	0.667794	2.26e-05	0.00449691
WBGene00003443	39.6569	-0.0473819	0.149372	2.28e-05	0.00449691
WBGene00021779	74.0899	-0.10017	0.199793	2.4e-05	0.00466099
WBGene00007875	44.8337	-0.0716525	0.166432	3.47e-05	0.00636081
WBGene00008629	25.9911	-0.0844002	0.179319	3.57e-05	0.00645009
WBGene00003246	297.434	-1.50735	0.456943	3.9e-05	0.00680673
WBGene00015024	27.7884	-0.0373	0.144564	4.25e-05	0.00716827
WBGene00013474	18.3213	-0.0629103	0.159317	4.43e-05	0.00718285
WBGene00007892	90.4806	-2.36887	0.713121	4.98e-05	0.00774992
WBGene00000606	22.397	-0.0385458	0.145062	5e-05	0.00774992
WBGene00009787	637.018	-1.56121	0.489291	5.14e-05	0.00782104
WBGene00005016	21.0038	-0.0352999	0.143756	5.36e-05	0.00805812
WBGene00018099	261.057	-1.52469	0.492638	7.13e-05	0.0102349
WBGene00001702	39.3779	-0.0730175	0.167624	8.84e-05	0.0121476
WBGene00000753	22.9655	-0.0275496	0.141037	0.00011384	0.0148302
WBGene00003424	21.8156	-0.0422654	0.146701	0.00013427	0.0167986
WBGene00019540	2652.98	-0.0965621	0.193621	0.0001381	0.0169421
WBGene00016054	48.8974	-0.0180375	0.138693	0.00013681	0.0169421
WBGene00004196	117.238	-1.39421	0.482417	0.00014008	0.01702
WBGene00020860	25.6452	-0.0401495	0.145722	0.00014805	0.0178164
WBGene00004398	19.2379	-0.0330431	0.142828	0.00015039	0.0179277
WBGene00001694	647.921	-1.47281	0.523063	0.00016117	0.0188777
WBGene00016447	68.8481	-0.0446689	0.147835	0.00017329	0.0194298
WBGene00000696	10011.5	-1.06646	0.387452	0.00020525	0.0221669
WBGene00003469	17.9383	-0.0446769	0.147826	0.00021687	0.0232239
WBGene00009581	25.7318	-0.0322956	0.142592	0.00022577	0.0237738
WBGene00011114	12.2154	-0.0252034	0.140351	0.00022427	0.0237738
WBGene00021296	248.266	-1.10335	0.408518	0.00024728	0.0252297
WBGene00001713	91.332	-0.116962	0.225733	0.00029192	0.0278522
WBGene00004904	13.09	-0.0464506	0.148747	0.00029034	0.0278522
WBGene00016440	20.6212	-0.0435088	0.147207	0.00029316	0.0278522
WBGene00015688	20.3975	-0.0354232	0.143749	0.00028617	0.0278522
WBGene00010563	21.0657	-0.0473317	0.149188	0.00030766	0.028586
WBGene00019586	24.4277	-0.057383	0.15517	0.00031688	0.0291683
WBGene00022090	9.00673	-0.0281938	0.141192	0.00032496	0.02933
WBGene00000656	4967.38	-1.60459	0.639628	0.00034273	0.0300748
WBGene00016659	32.8782	-0.0657709	0.161071	0.00037077	0.0320897
WBGene00008955	10.7494	-0.0632555	0.158749	0.00040231	0.0338909
WBGene00010486	13.4855	-0.0279578	0.141143	0.00043661	0.0365366
WBGene00007601	23.0201	-0.0388671	0.145099	0.00044141	0.0366948
WBGene00000757	5773.52	-1.09946	0.45167	0.00047323	0.0385792
WBGene00015355	47.2215	-0.0980582	0.194237	0.00048337	0.0391191
WBGene00000668	3880.95	-0.0978416	0.194406	0.00051803	0.0406483
WBGene00021381	14.8433	-0.0365781	0.144129	0.00059016	0.0441259
WBGene00000698	7641.88	-1.77246	0.789203	0.00060261	0.0447919
WBGene00194787	8.3218	-0.0247375	0.140194	0.0006356	0.0469671
WBGene00016322	33.2274	-0.0405356	0.145767	0.00067769	0.049452
WBGene00021207	13.2827	-0.0271006	0.140851	0.00068393	0.049452
WBGene00005012	11.0032	-0.0296833	0.141596	0.00070276	0.0504549

## Sheet: Up (D)
Wormbase ID	baseMean	log2FoldChange	lfcSE	p value	Adjusted p value
WBGene00006418	156.195	4.29304	0.464291	5.46e-22	6.9e-18
WBGene00011150	86.7894	9.99842	1.4442	4.28e-15	1.8e-11
WBGene00015152	99.5839	7.4489	1.01348	9.8e-15	3.1e-11
WBGene00004987	288.186	4.44969	0.638513	1.2e-13	3.04e-10
WBGene00018731	2006.92	5.55853	0.848967	2.62e-12	5.52e-09
WBGene00013939	32.5659	10.1069	2.84112	4.07e-11	7.35e-08
WBGene00018903	41.4157	3.31249	0.559943	1.75e-10	2.76e-07
WBGene00010062	43.7876	5.97276	1.02068	2.3e-10	3.23e-07
WBGene00044471	195.769	4.62004	0.790045	5.53e-10	6.99e-07
WBGene00044811	90.8582	3.44241	0.619133	9.52e-10	1.09e-06
WBGene00000708	5747.03	2.90624	0.53482	2.47e-09	2.6e-06
WBGene00004056	69.6163	2.4578	0.475082	9.55e-09	9.28e-06
WBGene00019105	152.397	4.17475	0.818611	1.06e-08	9.58e-06
WBGene00077616	33.0309	8.16208	1.6932	1.79e-08	1.51e-05
WBGene00004055	134.936	2.21933	0.461421	5.51e-08	3.87e-05
WBGene00019029	44.9033	3.62026	0.78148	5.45e-08	3.87e-05
WBGene00017105	189.675	1.68591	0.368875	1.99e-07	0.00011946
WBGene00008323	11.9644	4.46829	0.976984	2.78e-07	0.00015958
WBGene00045132	3942.38	3.72447	0.856863	5.05e-07	0.00025538
WBGene00007283	286.252	2.54561	0.588578	5.74e-07	0.00027888
WBGene00021772	15.6921	3.93905	0.934122	7.73e-07	0.00034895
WBGene00002090	85.027	3.3939	0.811918	1.05e-06	0.00045949
WBGene00005327	9.44085	8.3828	2.96108	1.42e-06	0.00058023
WBGene00044292	94.8392	0.148047	0.321535	1.59e-06	0.00060807
WBGene00045208	62.7872	3.46944	0.846556	1.57e-06	0.00060807
WBGene00021581	28.8323	2.86856	0.722529	2.35e-06	0.00082437
WBGene00003094	108.69	3.52394	0.892037	2.61e-06	0.0008666
WBGene00001677	17.8391	3.60856	0.967942	4.65e-06	0.00139837
WBGene00009397	120.511	1.84717	0.497961	7.34e-06	0.00205968
WBGene00019368	20.8568	2.70971	0.744394	1.02e-05	0.00252883
WBGene00000213	13.844	4.43906	1.2298	1.47e-05	0.00349835
WBGene00020016	13.3508	5.55378	1.54436	1.54e-05	0.00359832
WBGene00000298	386.768	2.03305	0.581888	1.64e-05	0.00376637
WBGene00009192	257.188	1.54821	0.442702	1.84e-05	0.00393984
WBGene00010005	1090.85	4.37486	1.28764	1.8e-05	0.00393984
WBGene00020900	9.44248	5.09486	1.4324	1.83e-05	0.00393984
WBGene00044723	13.4862	3.93295	1.17343	2.1e-05	0.00442954
WBGene00016052	144.891	2.18625	0.644664	2.21e-05	0.00449691
WBGene00000986	45.5912	3.48824	1.01744	2.26e-05	0.00449691
WBGene00022564	101.717	2.04169	0.605406	2.5e-05	0.00478097
WBGene00023069	6105.3	4.5283	1.37532	2.66e-05	0.00501568
WBGene00016745	93.112	1.40532	0.418307	3.16e-05	0.00586425
WBGene00016670	15.9629	5.16233	1.55035	3.93e-05	0.00680673
WBGene00013900	11.454	5.27146	1.59311	3.9e-05	0.00680673
WBGene00013101	8.85123	3.52652	1.07505	4.01e-05	0.00685289
WBGene00001938	64.6825	1.74148	0.544836	4.38e-05	0.00718285
WBGene00017498	111.997	2.18424	0.679803	4.37e-05	0.00718285
WBGene00012201	101.841	1.20472	0.373363	4.63e-05	0.00740508
WBGene00012139	180.995	1.55197	0.48321	5.03e-05	0.00774992
WBGene00004622	1.31376e+06	3.98115	1.29309	5.87e-05	0.00872508
WBGene00004989	388.28	1.53124	0.489447	6.29e-05	0.00924882
WBGene00009522	13.9061	3.49131	1.15274	6.4e-05	0.00929605
WBGene00022040	40.7601	3.53609	1.18307	7.86e-05	0.0110404
WBGene00044974	39.7295	3.98045	1.32112	7.81e-05	0.0110404
WBGene00008681	31.1102	3.10168	1.02994	8.54e-05	0.0118612
WBGene00219748	15.2166	2.52033	0.850642	0.00010435	0.0141778
WBGene00009903	17.672	3.15681	1.09357	0.00010588	0.0142331
WBGene00004057	100.44	2.32757	0.796971	0.00011113	0.0147809
WBGene00021055	26.8574	1.89192	0.641408	0.00011263	0.0148243
WBGene00018971	12.7382	3.45409	1.22948	0.00011711	0.0150996
WBGene00017103	29.1765	1.94684	0.670181	0.00012046	0.0153751
WBGene00011059	1758.95	1.26582	0.437268	0.00013351	0.0167986
WBGene00015052	195.652	3.82079	1.4267	0.00016135	0.0188777
WBGene00011330	216.324	1.71605	0.61682	0.00016741	0.0194076
WBGene00021335	101.583	1.87818	0.680111	0.00017124	0.0194298
WBGene00302993	42.3201	2.22074	0.802568	0.00017376	0.0194298
WBGene00045171	830.549	3.63864	1.36012	0.00017103	0.0194298
WBGene00194821	20.5622	3.30012	1.25433	0.0001877	0.0208056
WBGene00017093	25.4235	1.75669	0.645217	0.00019125	0.021014
WBGene00044183	10.1298	3.02944	1.06488	0.00019417	0.0211515
WBGene00000368	84.1916	2.55152	0.978081	0.00023314	0.0243469
WBGene00284858	1994.51	2.49411	0.953652	0.00023902	0.0247561
WBGene00010769	379.46	1.79966	0.681622	0.00024758	0.0252297
WBGene00017293	1024.45	1.03616	0.387385	0.0002665	0.0269397
WBGene00009902	284.029	1.40889	0.542336	0.00029276	0.0278522
WBGene00077757	58.5625	2.10385	0.839309	0.00029195	0.0278522
WBGene00008358	90.8845	2.29296	0.894926	0.00028259	0.0278522
WBGene00012910	24.466	2.33447	0.926091	0.00028761	0.0278522
WBGene00011434	402.539	1.04824	0.399125	0.00030309	0.0285807
WBGene00021582	6.53167	3.97274	1.52421	0.00030767	0.028586
WBGene00220198	35.2595	3.0734	1.29702	0.00032086	0.0291683
WBGene00016833	13.5313	5.22297	2.14514	0.00032038	0.0291683
WBGene00007362	143.885	1.25822	0.491991	0.00033183	0.029528
WBGene00021072	6.51591	4.37255	1.66582	0.00033142	0.029528
WBGene00194926	17.0499	2.62934	1.08162	0.0003381	0.0298756
WBGene00045117	9.07951	3.26272	1.28885	0.00036447	0.0317614
WBGene00018384	48.1603	1.31701	0.53338	0.00037892	0.0325716
WBGene00002259	130.342	1.32725	0.533221	0.00039526	0.0337112
WBGene00022887	80.679	1.64535	0.667364	0.00039751	0.0337112
WBGene00017964	317.157	1.69254	0.705454	0.00045702	0.0377449
WBGene00008577	23.6767	2.53695	1.07129	0.00047156	0.0385792
WBGene00009215	693.849	1.34076	0.55885	0.00048605	0.0391191
WBGene00011144	365.328	0.919216	0.376958	0.00050046	0.0400242
WBGene00021662	75.3719	1.58801	0.673034	0.00051304	0.0406103
WBGene00044472	285.823	2.39156	1.03646	0.00051422	0.0406103
WBGene00007303	201.414	1.13737	0.471161	0.00052113	0.0406483
WBGene00220238	67.1581	2.71287	1.18666	0.0005266	0.0408231
WBGene00013035	179.087	1.43491	0.612569	0.0005331	0.0410749
WBGene00010212	170.358	1.62571	0.693049	0.00054458	0.0417046
WBGene00011364	55.5957	1.70971	0.747909	0.00055271	0.0420728
WBGene00010597	5082.34	1.47691	0.643744	0.00057506	0.043512
WBGene00194985	11.8964	2.56988	1.14605	0.00058755	0.0441259
WBGene00194997	21.3462	0.0618187	0.157874	0.00067142	0.0493261
WBGene00006986	44.8732	1.31969	0.590504	0.00068488	0.049452
